# Supplementary material for: Pan-cancer integrative analysis of whole-genome De novo somatic point mutations reveals 17 cancer types
Source: Research Square preprint supplement (doi:10.21203/rs.3.rs-1567157/v1), 2022-04-20
Supplement: Supplementary file 1 [file 51fcd43a2e56fb458177008a.xlsx]

## Sheet: Supplementary Table S1
Table S1. Complete list of candidate genes with their corresponding P-value for each cancer type separately.
Bladder		Blood		Bone		Brain		Breast		Cervix		Colocteral		Esophagus		Head&Neck		Kidney		Liver		Lung		Nervous System		Ovary		Pancreas		Prostate		Skin		Stomach		Uterus
gene_id	pval	gene_id	pval	gene_id	pval	gene_id	pval	gene_id	pval	gene_id	pval	gene_id	pval	gene_id	pval	gene_id	pval	gene_id	pval	gene_id	pval	gene_id	pval	gene_id	pval	gene_id	pval	gene_id	pval	gene_id	pval	gene_id	pval	gene_id	pval	gene_id	pval
ENSG00000005339	0.000889516	ENSG00000009694	0.000569159	ENSG00000009694	0.000211056	ENSG00000009694	0.000257482	ENSG00000021645	1.86e-05	ENSG00000005339	6.3e-05	ENSG00000002746	0.000304369	ENSG00000141510	0.000727009	ENSG00000007174	0.000271462	ENSG00000021645	0.000205145	ENSG00000042781	0.000649775	ENSG00000007174	0.000460755	ENSG00000171094	0	ENSG00000021645	0.000507281	ENSG00000002746	0.000434748	ENSG00000018236	0.000346094	ENSG00000039139	0.000701638	ENSG00000007174	0.000161621	ENSG00000009694	0.000511249
ENSG00000005810	0.000889516	ENSG00000021645	7.86e-06	ENSG00000021645	1.03e-07	ENSG00000021645	4.83e-06	ENSG00000033122	0.000310997	ENSG00000006788	0.000458314	ENSG00000039139	0.000272274			ENSG00000009307	1.72e-05	ENSG00000041515	0.000799354	ENSG00000046889	0.000690428	ENSG00000033122	0.000658534	ENSG00000179295	0.000468258	ENSG00000033122	0.000544433	ENSG00000018236	0.000512769	ENSG00000021645	1.19e-06	ENSG00000155657	0.000346224	ENSG00000009694	0.000277678	ENSG00000041515	0.000787181
ENSG00000008300	0.000551136	ENSG00000033122	0.000250896	ENSG00000033122	0.000999777	ENSG00000033122	0.000832876	ENSG00000041515	0.000674548	ENSG00000008710	3.21e-05	ENSG00000042781	0.000380208			ENSG00000021645	0.000803665	ENSG00000042781	0.000138864	ENSG00000048052	0.000953981	ENSG00000039139	0.000285497			ENSG00000041515	0.000831624	ENSG00000021645	1.66e-05	ENSG00000033122	0.000169827	ENSG00000181143	0.000438522	ENSG00000021645	0.000416037	ENSG00000042781	0.000159861
ENSG00000039139	4.79e-05	ENSG00000038945	0.000110395	ENSG00000038945	0.000999777	ENSG00000038945	0.000217622	ENSG00000042781	4.83e-05	ENSG00000009694	0.000874415	ENSG00000042832	0.000592336			ENSG00000039139	0.000356511	ENSG00000048052	0.00040543	ENSG00000066032	0.000663054	ENSG00000040731	0.000321867			ENSG00000042781	0.000410307	ENSG00000033122	0.000455744	ENSG00000038945	0.000741917	ENSG00000204969	0.000905253	ENSG00000039139	4.14e-05	ENSG00000055609	0.000908448
ENSG00000042781	0.000128374	ENSG00000041515	0.00015954	ENSG00000041515	0.000211056	ENSG00000042781	1.34e-05	ENSG00000048052	0.000234097	ENSG00000011451	0.000122902	ENSG00000046889	0.000424861			ENSG00000041515	0.000803665	ENSG00000066032	0.000125944	ENSG00000078328	0.000993287	ENSG00000042781	4.75e-07			ENSG00000066032	0.000472655	ENSG00000041515	0.000477753	ENSG00000041515	0.000165563	ENSG00000204970	0.000849479	ENSG00000042781	1.82e-05	ENSG00000081842	2.18e-07
ENSG00000047410	2.91e-05	ENSG00000042781	3.45e-05	ENSG00000042781	3.76e-06	ENSG00000048052	5.19e-05	ENSG00000058091	0.000814331	ENSG00000038427	0.000238229	ENSG00000055609	4.51e-05			ENSG00000042781	2.27e-05	ENSG00000067798	0.000969979	ENSG00000080224	0.000916222	ENSG00000055609	0.000138591			ENSG00000078295	0.000722167	ENSG00000042781	0.000143304	ENSG00000042781	1.17e-05	ENSG00000255408	0.000964618	ENSG00000042832	0.000242592	ENSG00000081853	8.71e-08
ENSG00000048707	2.91e-05	ENSG00000044524	0.000305802	ENSG00000048052	6.92e-05	ENSG00000058091	0.000984417	ENSG00000066032	7.7e-06	ENSG00000039139	0.000874415	ENSG00000058453	2.04e-05			ENSG00000042832	0.000271462	ENSG00000075884	0.000880569	ENSG00000130226	0.000916222	ENSG00000058453	0.000584729			ENSG00000078328	0.000544433	ENSG00000048052	6.12e-05	ENSG00000044524	5.01e-05			ENSG00000046889	0.000107541	ENSG00000091656	0.000681897
ENSG00000053747	0.000340223	ENSG00000048052	0.000585443	ENSG00000053918	0.000999777	ENSG00000060709	0.000832876	ENSG00000072657	0.000580117	ENSG00000042781	8.18e-06	ENSG00000081842	5.29e-13			ENSG00000054654	0.000803665	ENSG00000078328	0.000138864	ENSG00000134516	0.000748595	ENSG00000060718	0.000253196			ENSG00000079841	0.000672943	ENSG00000050767	0.000747588	ENSG00000048052	1.95e-05			ENSG00000054654	0.0007116	ENSG00000117713	0.000185021
ENSG00000054654	8.09e-09	ENSG00000066032	5.43e-06	ENSG00000060709	0.000641594	ENSG00000066032	6.26e-07	ENSG00000075213	0.000755261	ENSG00000047410	0.000458314	ENSG00000081853	1.67e-11			ENSG00000055609	9.82e-06	ENSG00000080224	0.000333799	ENSG00000135298	0.000934912	ENSG00000066032	0.000285497			ENSG00000080224	0.000892396	ENSG00000058091	0.000445123	ENSG00000060718	0.000373521			ENSG00000055609	0.000813424	ENSG00000120549	0.000787181
ENSG00000055609	0.000889516	ENSG00000067715	0.000237098	ENSG00000066032	6.56e-08	ENSG00000069020	0.00046345	ENSG00000075884	0.00091165	ENSG00000047578	0.000874415	ENSG00000089876	0.0002178			ENSG00000064012	5.22e-05	ENSG00000081842	0.000725589	ENSG00000138829	0.000552639	ENSG00000067798	8.54e-05			ENSG00000107518	0.000544433	ENSG00000060709	0.000466619	ENSG00000066032	3.45e-08			ENSG00000060718	0.000813424	ENSG00000121879	5.33e-10
ENSG00000058453	0.000889516	ENSG00000067798	0.000821113	ENSG00000067715	0.00013515	ENSG00000071242	0.000905499	ENSG00000078328	5.78e-06	ENSG00000054654	1.02e-06	ENSG00000091656	1.29e-05			ENSG00000066032	0.000356511	ENSG00000081853	0.00040543	ENSG00000143341	0.000733611	ENSG00000081479	0.00019905			ENSG00000108684	0.000892396	ENSG00000066032	1.78e-05	ENSG00000067715	0.000533172			ENSG00000066032	0.000475906	ENSG00000121904	0.000442494
ENSG00000068078	1.07e-05	ENSG00000072657	0.0002439	ENSG00000071242	0.000999777	ENSG00000072657	0.000217622	ENSG00000080224	0.000190032	ENSG00000055609	1.42e-08	ENSG00000104447	0.000304369			ENSG00000080224	0.000803665	ENSG00000107518	0.000880569	ENSG00000144229	0.000862352	ENSG00000081842	7.56e-05			ENSG00000112232	0.000544433	ENSG00000067715	0.00035998	ENSG00000069667	0.00080069			ENSG00000067798	0.000544297	ENSG00000127603	0.000511249
ENSG00000072195	0.000551136	ENSG00000075213	3.35e-05	ENSG00000072657	8.65e-05	ENSG00000075213	0.000391866	ENSG00000083067	0.000137622	ENSG00000058453	6.3e-05	ENSG00000105877	0.000194763			ENSG00000081842	4.24e-06	ENSG00000107611	0.000367884	ENSG00000145191	0.000993287	ENSG00000081853	7.84e-07			ENSG00000115896	0.000831624	ENSG00000072657	0.000881553	ENSG00000072657	6.14e-05			ENSG00000078018	0.0007116	ENSG00000133703	0.000511249
ENSG00000073910	0.000889516	ENSG00000077092	0.000945294	ENSG00000075884	0.000999777	ENSG00000075884	0.00054804	ENSG00000085276	0.000894663	ENSG00000059915	0.000874415	ENSG00000106571	0.000155687			ENSG00000081853	5.87e-07	ENSG00000108684	0.000367884	ENSG00000145526	0.000828201	ENSG00000084674	0.00093962			ENSG00000116117	0.000957586	ENSG00000075213	0.000633936	ENSG00000075213	9.71e-05			ENSG00000079841	0.0007116	ENSG00000141510	8.58e-07
ENSG00000078295	0.000551136	ENSG00000078295	0.000394341	ENSG00000078295	0.000800979	ENSG00000078328	2.06e-07	ENSG00000102466	0.000322992	ENSG00000065526	0.000238229	ENSG00000107611	0.0005303			ENSG00000083067	0.000467844	ENSG00000113396	0.000658595	ENSG00000146555	0.000897903	ENSG00000091656	4.19e-07			ENSG00000128573	0.000722167	ENSG00000075884	0.000110485	ENSG00000075884	8.33e-05			ENSG00000081479	0.00092964	ENSG00000143341	0.000787181
ENSG00000081479	0.000128374	ENSG00000078328	4.45e-06	ENSG00000078328	5.48e-09	ENSG00000079841	0.000984417	ENSG00000106536	0.000784244	ENSG00000067798	3.21e-05	ENSG00000107736	0.0002178			ENSG00000083857	3.2e-06	ENSG00000113448	0.000302857	ENSG00000149972	0.000993287	ENSG00000105877	0.000138591			ENSG00000130226	0.000544433	ENSG00000078295	0.000991657	ENSG00000078328	2.74e-08			ENSG00000081842	4.84e-09	ENSG00000145191	4.93e-05
ENSG00000081842	3.33e-16	ENSG00000080224	1.69e-05	ENSG00000079841	0.000329413	ENSG00000080224	7.39e-06	ENSG00000107518	0.000661956	ENSG00000081479	6.3e-05	ENSG00000108018	0.000738707			ENSG00000111215	1.3e-05	ENSG00000116117	0.000969979	ENSG00000150275	0.000433366	ENSG00000107611	0.000741516			ENSG00000131374	0.000831624	ENSG00000078328	1.22e-05	ENSG00000079841	0.000446267			ENSG00000081853	4.2e-09	ENSG00000150275	0.000214092
ENSG00000081853	4.66e-15	ENSG00000081803	0.000138478	ENSG00000080224	4.71e-06	ENSG00000081803	0.000236718	ENSG00000108018	0.000799147	ENSG00000081842	1.09e-13	ENSG00000109536	0.000139172			ENSG00000117983	0.000613444	ENSG00000121904	0.000799354	ENSG00000150471	0.000811633	ENSG00000115762	0.000224514			ENSG00000132932	0.000831624	ENSG00000079841	0.000343386	ENSG00000080224	5.27e-05			ENSG00000086289	0.000813424	ENSG00000151914	0.00028645
ENSG00000083857	0.000889516	ENSG00000083067	0.000123644	ENSG00000083067	8.65e-05	ENSG00000081853	7.28e-05	ENSG00000108684	7.07e-05	ENSG00000081853	1.22e-15	ENSG00000111215	9.17e-06			ENSG00000121879	0.00020655	ENSG00000127603	0.000658595	ENSG00000153707	0.000845105	ENSG00000116147	0.000741516			ENSG00000135298	0.000472655	ENSG00000080224	4.19e-05	ENSG00000082397	0.000546897			ENSG00000086570	0.0007116	ENSG00000154358	0.000787181
ENSG00000086570	0.000209314	ENSG00000086991	0.000893522	ENSG00000085276	0.000411449	ENSG00000083067	7.28e-05	ENSG00000110693	0.000861626	ENSG00000084674	0.000122902	ENSG00000111799	0.0005303			ENSG00000121904	3e-05	ENSG00000128573	0.000799354	ENSG00000155052	0.00077948	ENSG00000116183	0.000285497			ENSG00000136267	0.000957586	ENSG00000083067	0.000298047	ENSG00000083067	0.000312629			ENSG00000091656	6.24e-05	ENSG00000155052	0.000590523
ENSG00000090920	4.79e-05	ENSG00000101333	0.000372682	ENSG00000086991	0.000641594	ENSG00000085224	0.000110936	ENSG00000112232	0.000148484	ENSG00000085224	0.000238229	ENSG00000113212	0.000920695			ENSG00000127603	0.000467844	ENSG00000130226	0.00024928	ENSG00000155093	0.000828201	ENSG00000117983	0.000834794			ENSG00000137766	0.000831624	ENSG00000088538	0.000680365	ENSG00000088538	0.0002135			ENSG00000101680	0.000161621	ENSG00000155657	1.87e-07
ENSG00000091656	1.77e-05	ENSG00000101746	0.000674095	ENSG00000101746	0.000999777	ENSG00000085276	0.000155409	ENSG00000112530	0.000700451	ENSG00000090920	1.62e-05	ENSG00000117983	2.86e-05			ENSG00000130226	0.000613444	ENSG00000131558	0.000880569	ENSG00000155657	9.05e-05	ENSG00000118997	0.0005191			ENSG00000139915	0.000957586	ENSG00000102290	5.7e-05	ENSG00000091831	0.00070515			ENSG00000102452	0.000242592	ENSG00000163092	0.000511249
ENSG00000095066	0.000340223	ENSG00000102290	4.09e-05	ENSG00000102466	8.65e-05	ENSG00000088538	0.00054804	ENSG00000112541	0.000591161	ENSG00000091536	6.3e-05	ENSG00000120322	0.000304369			ENSG00000131018	9.06e-05	ENSG00000132549	0.00040543	ENSG00000162670	0.000953981	ENSG00000121904	0.000253196			ENSG00000140945	0.000507281	ENSG00000102452	0.000633936	ENSG00000095777	0.000128386			ENSG00000104447	0.000277678	ENSG00000164796	8.25e-06
ENSG00000100031	0.000128374	ENSG00000102466	0.000146548	ENSG00000104059	0.000263693	ENSG00000091831	0.000426165	ENSG00000112902	0.000462555	ENSG00000091656	0.000458314	ENSG00000121879	2.86e-05			ENSG00000132938	0.000613444	ENSG00000132932	0.000725589	ENSG00000163092	0.000845105	ENSG00000124721	0.000658534			ENSG00000141510	1.96e-06	ENSG00000102466	0.00027767	ENSG00000099715	0.000546897			ENSG00000105877	9.39e-05	ENSG00000165323	7.67e-05
ENSG00000100345	0.000889516	ENSG00000104723	0.000194501	ENSG00000105877	0.000999777	ENSG00000101972	0.00054804	ENSG00000113448	7.63e-05	ENSG00000095066	0.000458314	ENSG00000121904	0.000474695			ENSG00000134516	0.000613444	ENSG00000132938	0.000969979	ENSG00000164796	0.000212927	ENSG00000127603	0.000362812			ENSG00000144229	0.000722167	ENSG00000102935	0.000747588	ENSG00000102290	6.8e-05			ENSG00000106571	0.000123199	ENSG00000168036	2.02e-05
ENSG00000101191	0.000340223	ENSG00000107518	4.85e-05	ENSG00000107518	0.00013515	ENSG00000102290	0.000183913	ENSG00000114279	0.000480357	ENSG00000100345	0.000874415	ENSG00000124721	0.000738707			ENSG00000136267	0.000613444	ENSG00000133424	0.000969979	ENSG00000165323	0.000953981	ENSG00000128731	0.000362812			ENSG00000144278	0.000831624	ENSG00000104044	0.000351586	ENSG00000102452	0.00014955			ENSG00000107611	0.000161621	ENSG00000168702	0.000247672
ENSG00000104884	0.000128374	ENSG00000108018	0.000164122	ENSG00000108018	5.53e-05	ENSG00000105877	0.000304608	ENSG00000115896	0.000252528	ENSG00000100393	1.02e-06	ENSG00000128731	0.000474695			ENSG00000137766	6.88e-05	ENSG00000134086	2.11e-08	ENSG00000166748	0.000748595	ENSG00000131018	7.35e-06			ENSG00000144451	0.000544433	ENSG00000104059	0.000802317	ENSG00000102466	5.76e-06			ENSG00000107736	0.000622408	ENSG00000171587	0.000138091
ENSG00000105877	4.79e-05	ENSG00000108684	5.92e-05	ENSG00000108684	9.23e-06	ENSG00000107249	0.000503982	ENSG00000116117	0.000282915	ENSG00000103197	0.000122902	ENSG00000128815	0.000124395			ENSG00000139220	0.000467844	ENSG00000134516	0.000799354	ENSG00000168702	0.000271738	ENSG00000132256	0.000156389			ENSG00000144619	0.000584294	ENSG00000104447	0.000841005	ENSG00000106536	0.000373521			ENSG00000111799	0.0007116	ENSG00000171862	1.18e-08
ENSG00000107611	0.000551136	ENSG00000109452	0.000101397	ENSG00000109452	0.000411449	ENSG00000107518	0.000257482	ENSG00000117114	0.000861626	ENSG00000105877	0.000458314	ENSG00000130635	1.62e-05			ENSG00000141510	7.9e-12	ENSG00000135298	0.000969979	ENSG00000169851	0.000811633	ENSG00000136011	0.000834794			ENSG00000145087	0.000774974	ENSG00000106536	0.000881553	ENSG00000107518	3.42e-05			ENSG00000118946	0.0007116	ENSG00000172915	0.000247672
ENSG00000111215	2.35e-06	ENSG00000110693	0.000142456	ENSG00000110693	0.000641594	ENSG00000108684	7.39e-06	ENSG00000120549	0.000428896	ENSG00000107611	0.000874415	ENSG00000130702	0.000304369			ENSG00000145087	0.000803665	ENSG00000136267	0.000597754	ENSG00000171587	0.000953981	ENSG00000141510	4.45e-10			ENSG00000145191	0.000957586	ENSG00000106571	0.000377373	ENSG00000108018	4.14e-06			ENSG00000118997	0.000544297	ENSG00000179869	0.000908448
ENSG00000112159	0.000889516	ENSG00000112232	0.000893522	ENSG00000112137	0.000641594	ENSG00000109452	0.000142854	ENSG00000121879	2.25e-05	ENSG00000109670	1.02e-06	ENSG00000131018	1.16e-06			ENSG00000145191	1.37e-06	ENSG00000139915	0.000302857	ENSG00000172915	0.000718927	ENSG00000143631	0.000176448			ENSG00000145526	0.000382278	ENSG00000107518	8.52e-05	ENSG00000108684	1.74e-06			ENSG00000120322	0.000416037	ENSG00000181143	0.000159861
ENSG00000112852	0.000209314	ENSG00000112530	0.000200083	ENSG00000112232	4.71e-06	ENSG00000110693	0.000984417	ENSG00000121904	0.000397674	ENSG00000111215	0.000238229	ENSG00000132549	0.000340204			ENSG00000145416	0.000467844	ENSG00000140945	0.000186088	ENSG00000174469	0.000795395	ENSG00000145113	0.000253196			ENSG00000145934	0.000440384	ENSG00000108018	9.59e-05	ENSG00000109452	0.000122019			ENSG00000121879	0.00031779	ENSG00000183117	0.00011926
ENSG00000113205	1.77e-05	ENSG00000112541	0.000237098	ENSG00000112541	6.92e-05	ENSG00000111700	0.000391866	ENSG00000128573	0.000405261	ENSG00000112159	6.3e-05	ENSG00000133703	1.11e-10			ENSG00000145934	0.000613444	ENSG00000144229	0.000153103	ENSG00000175497	0.000845105	ENSG00000145191	1.97e-05			ENSG00000147481	0.000472655	ENSG00000108684	3.08e-05	ENSG00000110693	0.000328936			ENSG00000121904	0.000141118	ENSG00000186472	0.000908448
ENSG00000115760	0.000128374	ENSG00000112902	0.000258092	ENSG00000112902	8.65e-05	ENSG00000112232	5.73e-06	ENSG00000130226	2.05e-05	ENSG00000114841	0.000458314	ENSG00000134516	0.000380208			ENSG00000147724	0.000467844	ENSG00000144451	0.000969979	ENSG00000176406	0.000953981	ENSG00000145362	0.000658534			ENSG00000147724	0.000957586	ENSG00000109452	0.000713187	ENSG00000112232	2.62e-06			ENSG00000124721	0.000211907	ENSG00000187323	0.000590523
ENSG00000117713	0.000889516	ENSG00000113100	0.000314568	ENSG00000113396	0.000641594	ENSG00000112530	0.00046345	ENSG00000131018	0.000602414	ENSG00000115423	0.000238229	ENSG00000134982	3.02e-14			ENSG00000148219	0.000613444	ENSG00000145113	7.31e-06	ENSG00000178568	0.000897903	ENSG00000147485	0.0005191			ENSG00000148219	0.000957586	ENSG00000112232	7.75e-05	ENSG00000112530	0.00018329			ENSG00000130508	0.0007116	ENSG00000188107	0.000382884
ENSG00000120322	7.85e-05	ENSG00000113396	0.00035221	ENSG00000113448	5.9e-06	ENSG00000112541	0.000183913	ENSG00000131374	9.23e-05	ENSG00000117713	0.000458314	ENSG00000141510	2.3e-13			ENSG00000148400	6.88e-05	ENSG00000145191	0.00040543	ENSG00000179869	0.00063676	ENSG00000147724	9.64e-05			ENSG00000148948	0.000440384	ENSG00000112530	0.000576909	ENSG00000112541	0.000161406			ENSG00000131018	4.31e-07	ENSG00000196218	0.000908448
ENSG00000120324	0.000889516	ENSG00000113448	2.13e-05	ENSG00000114279	0.00013515	ENSG00000112902	0.000217622	ENSG00000132549	0.00015423	ENSG00000117983	2.05e-06	ENSG00000143631	9.93e-05			ENSG00000150275	0.00020655	ENSG00000145216	0.000274772	ENSG00000179915	0.00063676	ENSG00000150275	0.000658534			ENSG00000149972	0.000472655	ENSG00000112541	0.000161281	ENSG00000112902	0.000842435			ENSG00000132256	8.19e-05	ENSG00000198216	0.000787181
ENSG00000121879	6.47e-06	ENSG00000113805	0.000585443	ENSG00000116117	0.000263693	ENSG00000113100	0.000647985	ENSG00000133019	0.000390228	ENSG00000121879	1.11e-16	ENSG00000144406	0.000738707			ENSG00000150471	0.000613444	ENSG00000145416	0.000367884	ENSG00000183117	0.000208641	ENSG00000151388	0.000584729			ENSG00000150275	0.000356156	ENSG00000112902	0.000107903	ENSG00000113100	0.000393003			ENSG00000132549	0.000416037	ENSG00000198626	4.25e-05
ENSG00000121904	0.000551136	ENSG00000114279	0.000454137	ENSG00000116147	0.00013515	ENSG00000113448	1.13e-05	ENSG00000134343	0.000591161	ENSG00000127481	0.000238229	ENSG00000145113	2.31e-06			ENSG00000151067	0.000803665	ENSG00000145526	7.72e-05	ENSG00000185008	0.000552639	ENSG00000155657	7.3e-12			ENSG00000150471	0.000472655	ENSG00000113100	0.000258683	ENSG00000113448	4.7e-06			ENSG00000133401	0.000416037	ENSG00000198838	0.00028645
ENSG00000123384	0.000889516	ENSG00000115896	0.000250896	ENSG00000117114	3.54e-05	ENSG00000114279	0.000131309	ENSG00000135298	0.00015133	ENSG00000127603	1.62e-05	ENSG00000145191	7.29e-06			ENSG00000151388	0.000803665	ENSG00000145934	0.000658595	ENSG00000185532	0.000916222	ENSG00000155816	0.000658534			ENSG00000150672	0.000410307	ENSG00000113396	0.000405048	ENSG00000114279	0.000131693			ENSG00000133958	0.00092964	ENSG00000198947	6.62e-05
ENSG00000124177	0.000551136	ENSG00000116117	4.33e-05	ENSG00000120549	0.00010813	ENSG00000115896	0.000169064	ENSG00000136267	0.000122795	ENSG00000128591	0.000874415	ENSG00000146143	0.000174142			ENSG00000151952	0.000803665	ENSG00000146143	0.000542505	ENSG00000186472	0.000313247	ENSG00000163092	4.64e-05			ENSG00000151067	0.000672943	ENSG00000113448	7.39e-05	ENSG00000114861	0.000886355			ENSG00000135298	0.000416037	ENSG00000204956	4.05e-08
ENSG00000124721	0.000889516	ENSG00000117114	4.58e-05	ENSG00000121904	0.000641594	ENSG00000116117	0.000169064	ENSG00000137766	0.000322992	ENSG00000128731	0.000874415	ENSG00000146555	1.29e-05			ENSG00000152208	0.000803665	ENSG00000146555	0.00024928	ENSG00000187323	0.000704534	ENSG00000163554	6.69e-05			ENSG00000151789	0.000722167	ENSG00000114279	0.000150242	ENSG00000115896	1.17e-05			ENSG00000138650	0.000416037	ENSG00000204961	6.11e-06
ENSG00000124942	7.85e-05	ENSG00000120549	7.22e-05	ENSG00000122584	0.000641594	ENSG00000117114	4.38e-05	ENSG00000138670	0.000894663	ENSG00000128815	0.000874415	ENSG00000147485	0.00082476			ENSG00000153707	0.00020655	ENSG00000147481	0.000367884	ENSG00000188107	0.000391583	ENSG00000164199	0.000658534			ENSG00000151952	0.000440384	ENSG00000115896	8.93e-05	ENSG00000116117	4.19e-05			ENSG00000141510	8.05e-08	ENSG00000204962	2.88e-06
ENSG00000127481	2.35e-06	ENSG00000120594	0.000372682	ENSG00000126733	2.26e-05	ENSG00000120549	1.73e-05	ENSG00000139364	0.00051803	ENSG00000130224	0.000874415	ENSG00000148408	6.33e-05			ENSG00000154358	0.000613444	ENSG00000148219	0.000492338	ENSG00000196090	0.000993287	ENSG00000164588	0.0005191			ENSG00000153707	0.000507281	ENSG00000116117	0.000161281	ENSG00000116783	0.00063699			ENSG00000143341	6.03e-06	ENSG00000204963	3.45e-07
ENSG00000127603	1.82e-07	ENSG00000126733	9.58e-05	ENSG00000128573	0.00013515	ENSG00000121904	0.00054804	ENSG00000139915	9.96e-05	ENSG00000130589	8.18e-06	ENSG00000149256	0.000592336			ENSG00000154928	0.000803665	ENSG00000148948	0.00024928	ENSG00000198626	0.000177306	ENSG00000164796	8.17e-08			ENSG00000154162	0.000507281	ENSG00000116147	0.000747588	ENSG00000117114	0.000435066			ENSG00000143631	8.19e-05	ENSG00000204965	1.87e-07
ENSG00000127914	0.000889516	ENSG00000128573	0.00029728	ENSG00000129682	0.000411449	ENSG00000126733	1.59e-05	ENSG00000140945	0.000129998	ENSG00000131018	1.62e-09	ENSG00000149531	0.000340204			ENSG00000155052	0.000119333	ENSG00000149972	0.000333799	ENSG00000198838	0.000748595	ENSG00000165323	0.000321867			ENSG00000154654	0.000584294	ENSG00000116183	0.000747588	ENSG00000120549	9.46e-05			ENSG00000144229	0.0007116	ENSG00000204967	4.05e-08
ENSG00000130702	0.000340223	ENSG00000129682	0.000314568	ENSG00000130226	4.18e-08	ENSG00000128573	0.000217622	ENSG00000141510	7.49e-05	ENSG00000133401	0.000874415	ENSG00000150275	0.0005303			ENSG00000155657	7.9e-12	ENSG00000150275	3.89e-05	ENSG00000204970	0.000862352	ENSG00000166157	0.000108795			ENSG00000155052	0.000309129	ENSG00000117114	0.000664524	ENSG00000121904	0.000403121			ENSG00000144893	0.000242592	ENSG00000204969	1.01e-08
ENSG00000131018	1.36e-08	ENSG00000130226	1.43e-05	ENSG00000131374	1.81e-05	ENSG00000128918	0.000704561	ENSG00000143341	0.000221159	ENSG00000140009	0.000874415	ENSG00000151240	0.000920695			ENSG00000155816	0.000271462	ENSG00000150394	0.000274772			ENSG00000167346	0.000321867			ENSG00000155093	0.000544433	ENSG00000120549	0.000477753	ENSG00000126733	7.72e-05			ENSG00000145191	1.05e-05	ENSG00000204970	6.37e-09
ENSG00000132142	0.000551136	ENSG00000131374	0.000441495	ENSG00000131558	0.000329413	ENSG00000129682	0.000503982	ENSG00000144218	0.000613881	ENSG00000140836	0.000122902	ENSG00000151914	0.000592336			ENSG00000157764	0	ENSG00000150471	0.000168795			ENSG00000168702	6.1e-07			ENSG00000155657	0.000957586	ENSG00000120594	0.000305166	ENSG00000127928	0.000457756			ENSG00000145362	0.000622408	ENSG00000249158	0.000185021
ENSG00000132549	0.000551136	ENSG00000132932	0.00029728	ENSG00000133019	0.000641594	ENSG00000130226	4.77e-05	ENSG00000144229	0.000186461	ENSG00000141736	0.000874415	ENSG00000152591	0.000111175			ENSG00000160145	0.000467844	ENSG00000150672	0.000367884			ENSG00000169876	0.000584729			ENSG00000156395	0.000892396	ENSG00000121904	0.00017727	ENSG00000128573	9.11e-06			ENSG00000146555	8.19e-05	ENSG00000250120	4.25e-05
ENSG00000134250	0.000551136	ENSG00000133019	0.000101397	ENSG00000133424	0.000168902	ENSG00000131018	0.000142854	ENSG00000144278	0.000687378	ENSG00000143341	0.000122902	ENSG00000154358	2.06e-06			ENSG00000161328	6.88e-05	ENSG00000151067	0.000302857			ENSG00000170927	0.000285497			ENSG00000156687	0.000831624	ENSG00000126733	0.000121446	ENSG00000130226	2.1e-07			ENSG00000147485	0.00031779	ENSG00000250349	0.000185021
ENSG00000135476	0.000551136	ENSG00000133424	0.000945294	ENSG00000134532	0.000513835	ENSG00000131374	3.12e-05	ENSG00000144451	0.000163269	ENSG00000143631	4.1e-06	ENSG00000155093	0.00082476			ENSG00000162105	0.000356511	ENSG00000151150	0.00024928			ENSG00000174469	0.000741516			ENSG00000157168	0.000584294	ENSG00000128573	0.00020915	ENSG00000131018	0.000122019			ENSG00000148219	0.000161621	ENSG00000251664	0.000331217
ENSG00000135976	1.09e-07	ENSG00000134115	0.0007983	ENSG00000135298	0.000168902	ENSG00000131558	0.000704561	ENSG00000144455	0.000814331	ENSG00000144452	0.000238229	ENSG00000155657	1.12e-13			ENSG00000163092	9.06e-05	ENSG00000151952	0.000226143			ENSG00000175894	0.000224514			ENSG00000158321	0.000892396	ENSG00000129682	0.000713187	ENSG00000131374	6.54e-06			ENSG00000149256	0.0007116	ENSG00000253305	0.000590523
ENSG00000138162	0.000551136	ENSG00000134343	0.000417255	ENSG00000136267	2.4e-06	ENSG00000132549	0.000426165	ENSG00000144619	7.07e-05	ENSG00000144893	0.000238229	ENSG00000157423	4.51e-05			ENSG00000164199	0.000119333	ENSG00000152208	0.000168795			ENSG00000178104	7.56e-05			ENSG00000159216	0.000774974	ENSG00000130226	3.15e-05	ENSG00000131558	0.000481628			ENSG00000150275	1.82e-05	ENSG00000253485	2.13e-06
ENSG00000138759	0.000551136	ENSG00000135218	0.000323585	ENSG00000136928	0.000999777	ENSG00000132932	0.000595931	ENSG00000144642	0.000262277	ENSG00000145113	2.16e-12	ENSG00000163046	0.000194763			ENSG00000164796	9.82e-06	ENSG00000153707	0.000125944			ENSG00000178965	0.000658534			ENSG00000164796	0.00028799	ENSG00000131018	0.000576909	ENSG00000132549	0.000373521			ENSG00000151067	0.00031779	ENSG00000253537	1.5e-05
ENSG00000139687	0.000340223	ENSG00000135298	0.000101397	ENSG00000137766	3.54e-05	ENSG00000132938	0.000110936	ENSG00000145191	0.000755261	ENSG00000145191	1.22e-07	ENSG00000163359	0.000424861			ENSG00000165323	2.27e-05	ENSG00000154162	0.000114222			ENSG00000179869	0.000285497			ENSG00000165323	0.000831624	ENSG00000131374	0.000199499	ENSG00000132932	0.000780599			ENSG00000151150	0.000813424	ENSG00000253731	3.89e-06
ENSG00000141510	2.29e-08	ENSG00000136267	1.95e-05	ENSG00000138413	0.000168902	ENSG00000133019	0.000331299	ENSG00000145216	0.000252528	ENSG00000148408	0.000458314	ENSG00000163554	0.000592336			ENSG00000166206	0.000271462	ENSG00000154654	0.000186088			ENSG00000181143	5.71e-09			ENSG00000165973	0.000722167	ENSG00000131558	0.000841005	ENSG00000132938	0.000533172			ENSG00000151952	0.000544297	ENSG00000253767	4.25e-05
ENSG00000141736	7.85e-05	ENSG00000137766	0.000150757	ENSG00000139220	0.000999777	ENSG00000133424	0.000832876	ENSG00000145362	0.000537954	ENSG00000149256	0.000458314	ENSG00000164199	0.0002178			ENSG00000167346	0.000613444	ENSG00000155093	0.00024928			ENSG00000182348	0.000321867			ENSG00000167632	0.000957586	ENSG00000132549	0.000500821	ENSG00000133019	0.000546897			ENSG00000153707	0.00031779	ENSG00000253846	0.000787181
ENSG00000142798	0.000209314	ENSG00000137872	0.000288994	ENSG00000139364	0.000263693	ENSG00000134343	0.00054804	ENSG00000145416	9.41e-05	ENSG00000151067	0.000874415	ENSG00000164796	1.82e-05			ENSG00000168702	9.82e-06	ENSG00000155657	8.32e-07			ENSG00000183091	0.000176448			ENSG00000168702	0.000356156	ENSG00000132932	0.000525001	ENSG00000133424	0.000533172			ENSG00000154162	0.000813424	ENSG00000253910	7.37e-07
ENSG00000143341	6.47e-08	ENSG00000138696	0.000733583	ENSG00000139915	7.38e-06	ENSG00000135298	5.65e-05	ENSG00000145526	0.000103484	ENSG00000151914	1.22e-07	ENSG00000165323	0.000174142			ENSG00000169862	0.000356511	ENSG00000155816	0.000302857			ENSG00000183117	8.54e-05			ENSG00000168843	0.000722167	ENSG00000132938	0.000271191	ENSG00000134115	0.00010475			ENSG00000154358	2.09e-05	ENSG00000253953	1.5e-05
ENSG00000143631	2.35e-06	ENSG00000138829	0.000868705	ENSG00000140015	0.000999777	ENSG00000136267	0.000110936	ENSG00000145934	8.08e-05	ENSG00000154358	2.05e-06	ENSG00000166157	0.00082476			ENSG00000169894	0.000803665	ENSG00000157168	0.000492338			ENSG00000186472	0.000834794			ENSG00000169306	0.000544433	ENSG00000133083	0.000434748	ENSG00000134532	0.000113055			ENSG00000155052	0.000622408	ENSG00000254221	2.18e-07
ENSG00000143669	7.85e-05	ENSG00000139144	0.000178669	ENSG00000140945	3.01e-06	ENSG00000137672	0.000217622	ENSG00000146555	6.94e-05	ENSG00000155657	0	ENSG00000167633	0.000474695			ENSG00000170927	0.000467844	ENSG00000158321	0.000367884			ENSG00000189056	0.000584729			ENSG00000169760	0.000627061	ENSG00000133424	0.000525001	ENSG00000135298	9.45e-07			ENSG00000155657	7.28e-13	ENSG00000254245	8.71e-08
ENSG00000144893	0.000551136	ENSG00000139220	0.000134611	ENSG00000142611	0.000641594	ENSG00000137766	0.000391866	ENSG00000147481	3.99e-05	ENSG00000157106	0.000458314	ENSG00000168477	0.0005303			ENSG00000171587	0.000119333	ENSG00000159216	0.000880569			ENSG00000196071	3.22e-05			ENSG00000169855	0.000722167	ENSG00000133703	2.2e-07	ENSG00000136267	4.3e-05			ENSG00000155816	0.0007116	ENSG00000255408	1.88e-08
ENSG00000145113	2.22e-16	ENSG00000139865	0.000508416	ENSG00000143473	0.000263693	ENSG00000138413	1.21e-09	ENSG00000147485	0.000405261	ENSG00000158486	1.62e-05	ENSG00000168702	0.000111175			ENSG00000172915	0.000356511	ENSG00000162670	0.000799354			ENSG00000196565	1.74e-05			ENSG00000169862	0.000672943	ENSG00000134115	0.000377373	ENSG00000137672	0.00020814			ENSG00000155897	0.000475906	ENSG00000261934	0.000382884
ENSG00000145191	1.21e-10	ENSG00000139915	3.17e-05	ENSG00000144229	1.53e-06	ENSG00000138759	0.000280059	ENSG00000147724	0.000412992	ENSG00000162641	0.000874415	ENSG00000169436	0.0005303			ENSG00000174469	0.000271462	ENSG00000163092	0.000725589			ENSG00000196569	0.00093962			ENSG00000170579	0.000722167	ENSG00000134343	0.000802317	ENSG00000137766	2e-05			ENSG00000156395	0.0007116	ENSG00000262209	2.88e-06
ENSG00000145216	0.000340223	ENSG00000140945	2.45e-05	ENSG00000144278	4.43e-05	ENSG00000139144	0.000426165	ENSG00000148219	0.000282915	ENSG00000163092	0.000458314	ENSG00000169876	0.000194763			ENSG00000174775	0.000271462	ENSG00000163116	0.000658595			ENSG00000198597	0.000321867			ENSG00000171587	0.000957586	ENSG00000134516	0.000173131	ENSG00000137872	0.000446267			ENSG00000158486	0.000813424	ENSG00000262576	2.54e-07
ENSG00000145362	7.85e-05	ENSG00000144229	4.45e-05	ENSG00000144290	0.000641594	ENSG00000139865	0.000360318	ENSG00000148655	0.000428896	ENSG00000163395	0.000238229	ENSG00000169894	5.05e-05			ENSG00000175894	0.000803665	ENSG00000163939	0.000125944			ENSG00000198626	1.19e-07			ENSG00000172260	0.000627061	ENSG00000134532	0.000335378	ENSG00000137968	0.0002824			ENSG00000163092	8.19e-05
ENSG00000147050	1.41e-06	ENSG00000144278	4.58e-05	ENSG00000144407	0.000513835	ENSG00000139915	1.04e-05	ENSG00000148948	7.07e-05	ENSG00000164061	0.000874415	ENSG00000170927	0.000424861			ENSG00000179915	0.000119333	ENSG00000164199	0.000446787			ENSG00000198838	5.93e-05			ENSG00000172264	0.000584294	ENSG00000135298	6.12e-05	ENSG00000138653	0.000506745			ENSG00000163554	1.2e-05
ENSG00000149115	0.000889516	ENSG00000144290	0.000821113	ENSG00000144451	4.71e-06	ENSG00000140945	4.44e-06	ENSG00000149256	0.000272402	ENSG00000164199	5.98e-08	ENSG00000171798	0.000272274			ENSG00000181143	1.44e-10	ENSG00000164418	0.000969979			ENSG00000198947	0.000460755			ENSG00000173406	0.000627061	ENSG00000136267	0.000165138	ENSG00000138670	0.000590228			ENSG00000164199	0.00031779
ENSG00000151150	0.000209314	ENSG00000144366	0.000821113	ENSG00000144455	0.000329413	ENSG00000141376	0.00076605	ENSG00000149571	0.000537954	ENSG00000164309	0.000874415	ENSG00000171811	0.0005303			ENSG00000181234	0.000356511	ENSG00000164796	2.9e-05			ENSG00000204956	3.26e-07			ENSG00000174469	0.000382278	ENSG00000137766	0.000169087	ENSG00000139144	0.000337406			ENSG00000164796	5.7e-07
ENSG00000151835	7.85e-05	ENSG00000144407	0.000821113	ENSG00000144619	3.54e-05	ENSG00000141510	1.43e-09	ENSG00000149972	0.000129998	ENSG00000164796	0.000458314	ENSG00000172915	0.00082476			ENSG00000183020	0.00020655	ENSG00000165323	0.00024928			ENSG00000204962	0.000658534			ENSG00000174473	0.000892396	ENSG00000137872	0.00020915	ENSG00000139220	0.000393003			ENSG00000165323	3.47e-06
ENSG00000151914	0.000551136	ENSG00000144451	5.92e-05	ENSG00000145416	2.83e-05	ENSG00000141564	0.000155409	ENSG00000150275	8e-06	ENSG00000165323	0.000874415	ENSG00000172969	0.000661534			ENSG00000183117	4.24e-06	ENSG00000165973	0.000492338			ENSG00000204963	0.000138591			ENSG00000174482	0.000957586	ENSG00000139220	0.000619173	ENSG00000139364	0.000224639			ENSG00000167346	0.0007116
ENSG00000153201	0.000889516	ENSG00000144619	2.75e-05	ENSG00000145526	2.66e-08	ENSG00000143341	0.000257482	ENSG00000150394	0.000928958	ENSG00000166341	0.000458314	ENSG00000174469	0.00082476			ENSG00000183230	0.000356511	ENSG00000166748	0.00024928			ENSG00000204965	6.69e-05			ENSG00000175161	0.000410307	ENSG00000139915	2.11e-05	ENSG00000139915	2.16e-07			ENSG00000168702	4.96e-07
ENSG00000154358	0.000128374	ENSG00000144642	0.000134611	ENSG00000145934	0.00013515	ENSG00000143951	0.000984417	ENSG00000150471	0.000137622	ENSG00000167548	1.22e-07	ENSG00000175894	5.05e-05			ENSG00000183454	0.000356511	ENSG00000166833	0.000658595			ENSG00000204967	2.23e-05			ENSG00000175497	0.000331814	ENSG00000140538	0.000327556	ENSG00000140945	7.62e-06			ENSG00000168959	0.000813424
ENSG00000155657	0	ENSG00000144724	0.000194501	ENSG00000146555	4.71e-06	ENSG00000144229	1.34e-05	ENSG00000150672	4.15e-05	ENSG00000168477	0.000238229	ENSG00000177239	0.000592336			ENSG00000184304	0.000613444	ENSG00000168702	3.2e-05			ENSG00000204969	8.32e-06			ENSG00000175600	0.000957586	ENSG00000140945	3.15e-05	ENSG00000141837	0.000560975			ENSG00000169862	0.000416037
ENSG00000155816	1.21e-10	ENSG00000145012	0.000372682	ENSG00000147202	6.92e-05	ENSG00000144451	5.26e-06	ENSG00000151067	0.000316938	ENSG00000168702	0.000238229	ENSG00000178104	8.88e-05			ENSG00000184956	5.87e-07	ENSG00000168843	0.00040543			ENSG00000204970	3.5e-06			ENSG00000176204	0.000892396	ENSG00000141510	4.19e-05	ENSG00000143341	5.99e-05			ENSG00000170927	0.000416037
ENSG00000157423	2.91e-05	ENSG00000145147	0.000569159	ENSG00000147481	5.9e-06	ENSG00000144455	0.00046345	ENSG00000151150	0.000928958	ENSG00000169876	8.18e-06	ENSG00000178209	9.93e-05			ENSG00000185565	0.000803665	ENSG00000169306	0.000542505			ENSG00000205038	8.54e-05			ENSG00000176406	0.000831624	ENSG00000143341	0.000434748	ENSG00000143473	0.000533172			ENSG00000172915	8.19e-05
ENSG00000158486	7.85e-05	ENSG00000145216	0.000674095	ENSG00000147488	0.000641594	ENSG00000144619	1.04e-05	ENSG00000151322	0.000727343	ENSG00000169994	0.000874415	ENSG00000179869	2.56e-05			ENSG00000186472	1.72e-05	ENSG00000169855	0.000597754			ENSG00000213931	0.000108795			ENSG00000176571	0.000472655	ENSG00000143473	0.000713187	ENSG00000144229	1.57e-06			ENSG00000174469	0.000185077
ENSG00000159450	0.000551136	ENSG00000145242	0.000217808	ENSG00000147724	3.76e-06	ENSG00000144642	0.000257482	ENSG00000151474	0.000272402	ENSG00000170776	0.000458314	ENSG00000181143	1.24e-08			ENSG00000187323	0.000803665	ENSG00000169862	0.000446787			ENSG00000219481	0.000834794			ENSG00000176771	0.000892396	ENSG00000143951	0.000680365	ENSG00000144278	7.24e-06			ENSG00000176406	9.39e-05
ENSG00000159753	0.000340223	ENSG00000145416	0.000230486	ENSG00000148219	0.000411449	ENSG00000145012	0.000426165	ENSG00000151789	0.000103484	ENSG00000171316	0.000874415	ENSG00000183020	1.45e-05			ENSG00000188107	0.00020655	ENSG00000169946	0.000880569			ENSG00000250349	0.000658534			ENSG00000177694	0.000722167	ENSG00000144218	0.000327556	ENSG00000144290	0.000653387			ENSG00000176771	0.0007116
ENSG00000160145	0.000128374	ENSG00000145431	0.000713194	ENSG00000148948	3.17e-07	ENSG00000145191	0.000331299	ENSG00000151952	2.01e-05	ENSG00000171862	0.000458314	ENSG00000183091	0.000474695			ENSG00000189056	0.000356511	ENSG00000170624	0.000492338			ENSG00000253485	1.2e-05			ENSG00000179242	0.000722167	ENSG00000144229	1.92e-05	ENSG00000144451	5.61e-06			ENSG00000178209	0.000475906
ENSG00000160299	0.000340223	ENSG00000145526	8.81e-06	ENSG00000149256	0.000513835	ENSG00000145216	3.44e-06	ENSG00000152061	0.000272402	ENSG00000172915	0.000238229	ENSG00000183117	7.29e-06			ENSG00000196090	0.000271462	ENSG00000171094	0.000725589			ENSG00000253537	9.64e-05			ENSG00000179399	0.000627061	ENSG00000144278	0.000130374	ENSG00000144455	0.000560975			ENSG00000178568	0.000185077
ENSG00000161328	0.000340223	ENSG00000145934	2.32e-05	ENSG00000149972	5.24e-08	ENSG00000145416	2.64e-05	ENSG00000152208	4.07e-05	ENSG00000173157	0.000874415	ENSG00000183638	0.000155687			ENSG00000196565	0.000467844	ENSG00000171587	0.000492338			ENSG00000253731	4.64e-05			ENSG00000179603	0.000722167	ENSG00000144290	0.000305166	ENSG00000144619	3.29e-06			ENSG00000179242	0.00092964
ENSG00000163092	1.07e-05	ENSG00000146555	4.85e-05	ENSG00000150275	1.35e-08	ENSG00000145526	1.14e-06	ENSG00000153707	1.11e-05	ENSG00000173230	0.000238229	ENSG00000184185	0.000174142			ENSG00000198626	2.27e-05	ENSG00000172260	0.000725589			ENSG00000253767	0.000176448			ENSG00000179915	0.000382278	ENSG00000144451	6.26e-05	ENSG00000144642	0.0002824			ENSG00000179869	0.000813424
ENSG00000163359	0.000889516	ENSG00000147202	0.000467139	ENSG00000150361	0.000411449	ENSG00000145934	4.77e-05	ENSG00000154162	4.74e-05	ENSG00000173821	0.000238229	ENSG00000184956	2.89e-07			ENSG00000198838	0.000467844	ENSG00000172264	0.000226143			ENSG00000253910	4.48e-06			ENSG00000180287	0.000544433	ENSG00000144455	0.000783644	ENSG00000145012	0.000575416			ENSG00000179915	6.24e-05
ENSG00000163554	0.000128374	ENSG00000147246	0.000893522	ENSG00000150471	1.22e-06	ENSG00000146555	5.73e-06	ENSG00000154678	0.000845566	ENSG00000175894	1.62e-05	ENSG00000185567	0.000424861			ENSG00000198947	0.000119333	ENSG00000172987	0.000597754			ENSG00000253953	0.000122801			ENSG00000181804	0.000892396	ENSG00000144619	2.93e-05	ENSG00000145216	0.000110216			ENSG00000181143	7e-08
ENSG00000164068	0.000209314	ENSG00000147481	2.67e-05	ENSG00000150672	3.76e-06	ENSG00000146648	1.34e-05	ENSG00000154928	0.00022539	ENSG00000177380	0.000874415	ENSG00000186472	0.000304369			ENSG00000204956	4.42e-07	ENSG00000173406	0.00024928			ENSG00000254221	2.41e-06			ENSG00000182050	0.000774974	ENSG00000144642	0.000343386	ENSG00000145362	2.79e-05			ENSG00000182348	0.000475906
ENSG00000164199	7.85e-05	ENSG00000147724	0.000441495	ENSG00000151322	0.000641594	ENSG00000147202	5.19e-05	ENSG00000154975	0.00091165	ENSG00000178104	0.000122902	ENSG00000187391	0.000920695			ENSG00000204961	5.22e-05	ENSG00000173482	0.000658595			ENSG00000254245	7.84e-07			ENSG00000182667	0.000410307	ENSG00000145087	0.00096859	ENSG00000145416	1.74e-06			ENSG00000183091	0.00092964
ENSG00000164796	8.49e-07	ENSG00000148219	6.82e-05	ENSG00000151789	0.000211056	ENSG00000147481	5.73e-06	ENSG00000155052	7.78e-05	ENSG00000178209	3.21e-05	ENSG00000187775	0.000738707			ENSG00000204962	2.27e-05	ENSG00000174469	0.000103587			ENSG00000255168	0.000658534			ENSG00000182901	0.000774974	ENSG00000145147	0.000730186	ENSG00000145526	1.25e-06			ENSG00000183117	9.95e-07
ENSG00000165323	0.000889516	ENSG00000148498	0.000230486	ENSG00000151952	1.03e-07	ENSG00000147485	0.000503982	ENSG00000155093	2.34e-05	ENSG00000179869	0.000874415	ENSG00000188107	0.000474695			ENSG00000204963	5.61e-06	ENSG00000174473	0.000302857			ENSG00000255408	1.36e-05			ENSG00000183117	0.000356156	ENSG00000145216	0.000377373	ENSG00000145934	3.55e-06			ENSG00000185008	0.00092964
ENSG00000167346	0.000889516	ENSG00000148655	7.42e-05	ENSG00000152208	6.56e-08	ENSG00000148219	4.03e-05	ENSG00000155657	0.000293831	ENSG00000181143	1.81e-10	ENSG00000196126	0.000139172			ENSG00000204965	4.24e-06	ENSG00000174482	0.000725589			ENSG00000261934	0.00093962			ENSG00000183230	0.000440384	ENSG00000145242	0.000305166	ENSG00000146143	0.000519791			ENSG00000186472	4.58e-06
ENSG00000167978	0.000340223	ENSG00000148948	3.75e-06	ENSG00000152377	0.000800979	ENSG00000148513	0.000280059	ENSG00000155816	6.19e-05	ENSG00000183091	8.18e-06	ENSG00000196159	6.33e-05			ENSG00000204967	1.03e-06	ENSG00000175161	0.000186088			ENSG00000262209	2.85e-05			ENSG00000183715	0.000584294	ENSG00000145362	0.000633936	ENSG00000146555	6.3e-05			ENSG00000187323	0.000185077
ENSG00000168477	2.91e-05	ENSG00000149256	0.000362302	ENSG00000152578	0.000800979	ENSG00000148655	0.00054804	ENSG00000155849	0.00091165	ENSG00000183117	6.3e-05	ENSG00000196218	0.000124395			ENSG00000204969	1.89e-07	ENSG00000175497	0.000138864			ENSG00000262576	3.5e-06			ENSG00000184226	0.000774974	ENSG00000145416	3.81e-05	ENSG00000146592	0.00098118			ENSG00000187391	0.00092964
ENSG00000168702	1.77e-05	ENSG00000149571	0.000480513	ENSG00000153707	4.56e-10	ENSG00000148948	9.59e-07	ENSG00000156395	0.000288322	ENSG00000183914	0.000238229	ENSG00000196557	0.000243534			ENSG00000204970	1.07e-07	ENSG00000176204	0.000597754							ENSG00000184672	0.000627061	ENSG00000145526	2.21e-05	ENSG00000147481	5.82e-07			ENSG00000188906	0.000475906
ENSG00000169876	6.47e-06	ENSG00000149972	2.9e-06	ENSG00000154162	1.29e-07	ENSG00000149256	0.000360318	ENSG00000156687	0.000118215	ENSG00000185567	6.3e-05	ENSG00000196565	5.8e-06			ENSG00000212127	5.22e-05	ENSG00000176571	0.000542505							ENSG00000185008	0.000507281	ENSG00000145934	3.38e-05	ENSG00000147485	0.000268399			ENSG00000189056	0.000242592
ENSG00000171587	0.000209314	ENSG00000150275	3.86e-06	ENSG00000154654	0.00013515	ENSG00000149972	8.08e-07	ENSG00000157168	5.74e-05	ENSG00000186472	6.3e-05	ENSG00000197653	0.000424861			ENSG00000213281	1.3e-05	ENSG00000176771	0.000880569							ENSG00000185046	0.000957586	ENSG00000146143	0.00064905	ENSG00000147724	0.0004135			ENSG00000196071	0.000185077
ENSG00000172236	0.000209314	ENSG00000150361	7.01e-05	ENSG00000154678	0.000263693	ENSG00000150275	1.58e-08	ENSG00000157445	0.000243139	ENSG00000186487	0.000458314	ENSG00000198626	4.51e-05			ENSG00000250120	0.000271462	ENSG00000177694	0.000880569							ENSG00000185053	0.000472655	ENSG00000146555	5.83e-05	ENSG00000148219	0.000125162			ENSG00000196090	0.00036364
ENSG00000173230	0.000889516	ENSG00000150394	0.000123644	ENSG00000154928	0.000641594	ENSG00000150361	0.000832876	ENSG00000157680	0.000755261	ENSG00000188738	0.000874415	ENSG00000198788	5.8e-06			ENSG00000250349	0.000119333	ENSG00000178104	0.000880569							ENSG00000185532	0.000584294	ENSG00000146938	0.000489151	ENSG00000148513	0.000446267			ENSG00000196159	2.29e-06
ENSG00000175894	5.09e-07	ENSG00000150471	7.64e-06	ENSG00000154975	0.000329413	ENSG00000150394	0.000704561	ENSG00000158321	7.78e-05	ENSG00000196159	0.000458314	ENSG00000198838	0.000194763			ENSG00000253485	3.95e-05	ENSG00000178568	0.000103587							ENSG00000185565	0.000507281	ENSG00000147202	0.000386382	ENSG00000148655	0.00029713			ENSG00000196218	0.000211907
ENSG00000177380	0.000340223	ENSG00000150672	1.08e-05	ENSG00000155052	1.92e-06	ENSG00000150471	8.61e-05	ENSG00000159216	0.000186461	ENSG00000196218	1.62e-05	ENSG00000203780	0.000304369			ENSG00000253537	0.000803665	ENSG00000179242	0.000367884							ENSG00000185737	0.000831624	ENSG00000147481	4.29e-05	ENSG00000148948	5.74e-08			ENSG00000196565	6.55e-07
ENSG00000178104	2.35e-06	ENSG00000150760	0.000273107	ENSG00000155093	8.22e-08	ENSG00000150672	1.24e-06	ENSG00000162105	0.000649597	ENSG00000196367	0.000122902	ENSG00000204956	9.21e-12			ENSG00000253731	0.000271462	ENSG00000179399	0.000226143							ENSG00000185942	0.000957586	ENSG00000147485	0.000405048	ENSG00000149256	0.000125162			ENSG00000196963	0.00092964
ENSG00000178149	0.000209314	ENSG00000151025	0.000844575	ENSG00000155657	0.00010813	ENSG00000151067	0.000236718	ENSG00000162687	0.00087799	ENSG00000196565	6.3e-05	ENSG00000204961	6.54e-10			ENSG00000253910	1.72e-05	ENSG00000179603	0.000367884							ENSG00000186094	0.000544433	ENSG00000147724	0.000525001	ENSG00000149571	0.00020814			ENSG00000197410	0.000622408
ENSG00000178209	0.000340223	ENSG00000151067	0.000508416	ENSG00000155816	0.000800979	ENSG00000151150	0.000131309	ENSG00000162849	0.000310997	ENSG00000197102	0.000238229	ENSG00000204962	2.86e-10			ENSG00000253953	0.000803665	ENSG00000179869	0.00040543							ENSG00000186487	0.000507281	ENSG00000148219	4.83e-05	ENSG00000149972	1.67e-07			ENSG00000198597	0.000161621
ENSG00000179869	0.000551136	ENSG00000151276	0.000164122	ENSG00000155849	0.000329413	ENSG00000151322	0.000183913	ENSG00000163116	0.000405261	ENSG00000197410	0.000458314	ENSG00000204963	2.8e-12			ENSG00000254221	4.24e-06	ENSG00000179915	0.000226143							ENSG00000187323	0.000440384	ENSG00000148513	0.00064905	ENSG00000150275	2.35e-08			ENSG00000198626	4.58e-06
ENSG00000180900	0.000551136	ENSG00000151322	5.43e-05	ENSG00000155966	0.000641594	ENSG00000151474	6.69e-05	ENSG00000164418	0.000508345	ENSG00000197653	0.000122902	ENSG00000204965	3.7e-13			ENSG00000254245	5.87e-07	ENSG00000181143	6.35e-05							ENSG00000187391	0.000440384	ENSG00000148655	0.000252647	ENSG00000150394	4.76e-05			ENSG00000198838	2.39e-05
ENSG00000181143	5.55e-16	ENSG00000151338	0.000655354	ENSG00000156395	0.000168902	ENSG00000151789	8.76e-06	ENSG00000164588	0.00055864	ENSG00000197694	0.000238229	ENSG00000204967	4.86e-14			ENSG00000255408	2.51e-07	ENSG00000182050	0.00040543							ENSG00000188107	0.000440384	ENSG00000148848	0.000576909	ENSG00000150471	6.13e-07			ENSG00000198947	9.39e-05
ENSG00000183091	7.85e-05	ENSG00000151474	0.000844575	ENSG00000156475	0.000329413	ENSG00000151952	5.73e-06	ENSG00000164796	2.43e-05	ENSG00000197915	0.000874415	ENSG00000204969	1.15e-14			ENSG00000262209	9.06e-05	ENSG00000182621	0.000799354							ENSG00000188580	0.000892396	ENSG00000148948	2.26e-05	ENSG00000150625	0.000780599			ENSG00000204956	3.65e-09
ENSG00000183117	0.000551136	ENSG00000151789	3.86e-05	ENSG00000156687	6.92e-05	ENSG00000152061	0.000704561	ENSG00000164830	0.000861626	ENSG00000198626	2.92e-08	ENSG00000204970	3.55e-15			ENSG00000262576	7.42e-06	ENSG00000182667	0.000597754							ENSG00000188641	0.000831624	ENSG00000149256	0.000143304	ENSG00000150672	4.87e-07			ENSG00000204961	2.28e-08
ENSG00000183495	7.85e-05	ENSG00000151952	6.44e-05	ENSG00000157168	5.24e-08	ENSG00000152208	1.6e-06	ENSG00000165323	0.00035503	ENSG00000198793	0.000874415	ENSG00000205277	0.0005303					ENSG00000182901	0.000880569							ENSG00000189108	0.000892396	ENSG00000149403	0.000783644	ENSG00000151025	0.000113055			ENSG00000204962	1.49e-08
ENSG00000183914	0.000889516	ENSG00000152208	5.58e-06	ENSG00000157445	0.000211056	ENSG00000153064	7.28e-05	ENSG00000165973	7.49e-05	ENSG00000198838	0.000874415	ENSG00000206190	0.00082476					ENSG00000183098	0.000880569							ENSG00000189283	0.000831624	ENSG00000149571	0.000946059	ENSG00000151067	0.000864116			ENSG00000204963	9.79e-09
ENSG00000184956	6.47e-06	ENSG00000152214	0.000224058	ENSG00000158258	0.000641594	ENSG00000153707	6.72e-09	ENSG00000166206	0.000580117	ENSG00000198947	2.05e-06	ENSG00000212127	5.05e-05					ENSG00000183117	7e-05							ENSG00000196090	0.000382278	ENSG00000149972	2.73e-05	ENSG00000151322	3.79e-05			ENSG00000204965	4.2e-09
ENSG00000185567	1.82e-07	ENSG00000152377	0.000494268	ENSG00000158321	4.43e-05	ENSG00000154162	3.75e-07	ENSG00000166501	0.000946592	ENSG00000204514	0.000874415	ENSG00000213931	0.000194763					ENSG00000183230	0.000153103							ENSG00000196277	0.000584294	ENSG00000150275	1.01e-05	ENSG00000151474	0.000312629			ENSG00000204967	8.88e-10
ENSG00000187775	0.000889516	ENSG00000152894	0.000332859	ENSG00000159216	5.53e-05	ENSG00000154654	9.37e-05	ENSG00000166748	0.000127551	ENSG00000204956	2.22e-16	ENSG00000215182	0.000661534					ENSG00000183715	0.000658595							ENSG00000198597	0.000831624	ENSG00000150361	0.000604752	ENSG00000151789	5.76e-06			ENSG00000204969	3.8e-10
ENSG00000189056	0.000551136	ENSG00000153707	2.18e-06	ENSG00000162105	0.000263693	ENSG00000154864	0.000984417	ENSG00000166833	0.000799147	ENSG00000204961	3.77e-10	ENSG00000227124	0.000155687					ENSG00000184226	0.000725589							ENSG00000198626	0.000382278	ENSG00000150394	7.57e-05	ENSG00000151834	0.000575416			ENSG00000204970	1.62e-10
ENSG00000196159	2.91e-05	ENSG00000153956	6.09e-05	ENSG00000162670	5.53e-05	ENSG00000155052	8.04e-06	ENSG00000166960	0.00087799	ENSG00000204962	1.99e-11	ENSG00000228273	0.000424861					ENSG00000184305	0.000597754							ENSG00000198947	0.000331814	ENSG00000150471	8.93e-05	ENSG00000151952	3.6e-05			ENSG00000213931	5.44e-05
ENSG00000196218	7.85e-05	ENSG00000154162	8.09e-06	ENSG00000163092	0.000800979	ENSG00000155093	1.6e-07	ENSG00000167632	0.000508345	ENSG00000204963	2.3e-13	ENSG00000239389	5.05e-05					ENSG00000184347	0.000969979							ENSG00000204442	0.000957586	ENSG00000150625	0.000991657	ENSG00000152061	0.000494027			ENSG00000218336	0.000475906
ENSG00000196565	0.000551136	ENSG00000154654	8.8e-05	ENSG00000163116	1.45e-05	ENSG00000155657	2.25e-07	ENSG00000168702	1.82e-05	ENSG00000204965	5.15e-14	ENSG00000249158	5.79e-07					ENSG00000184672	0.000542505							ENSG00000250588	0.000774974	ENSG00000150672	2.49e-05	ENSG00000152208	1.95e-07			ENSG00000221866	0.000622408
ENSG00000196569	0.000551136	ENSG00000154678	0.00035221	ENSG00000163288	0.000641594	ENSG00000155966	7.92e-05	ENSG00000168843	0.000288322	ENSG00000204967	1.22e-15	ENSG00000250120	3.15e-08					ENSG00000185008	0.000138864							ENSG00000253350	0.000892396	ENSG00000151067	0.000343386	ENSG00000152402	0.000932564			ENSG00000239389	2.09e-05
ENSG00000196963	2.91e-05	ENSG00000154928	0.000602191	ENSG00000164035	0.000999777	ENSG00000157168	8.04e-06	ENSG00000168959	0.000741172	ENSG00000204969	0	ENSG00000251664	2.31e-06					ENSG00000185046	0.000446787							ENSG00000272781	0.000957586	ENSG00000151322	0.00021415	ENSG00000152495	0.000886355			ENSG00000249158	7.53e-07
ENSG00000197410	0.000889516	ENSG00000154975	0.00035221	ENSG00000164418	0.000329413	ENSG00000157445	0.000183913	ENSG00000169436	0.000799147	ENSG00000204970	0	ENSG00000253305	3.27e-06					ENSG00000185053	0.000367884									ENSG00000151388	0.000489151	ENSG00000152578	0.000142134			ENSG00000250120	1.62e-07
ENSG00000197653	7.85e-05	ENSG00000155052	1.2e-05	ENSG00000164588	9.23e-06	ENSG00000157985	0.000832876	ENSG00000169760	0.000293831	ENSG00000205038	0.000874415	ENSG00000253485	4.08e-10					ENSG00000185345	0.000969979									ENSG00000151474	0.000240992	ENSG00000152822	0.000435066			ENSG00000251664	1.31e-06
ENSG00000197694	1.77e-05	ENSG00000155093	8.81e-06	ENSG00000164796	4.18e-08	ENSG00000158321	1.04e-05	ENSG00000169855	0.000118215	ENSG00000205277	4.1e-06	ENSG00000253537	2.5e-08					ENSG00000185532	0.000302857									ENSG00000151789	6.26e-05	ENSG00000152953	0.000138565			ENSG00000253305	2.39e-05
ENSG00000198597	0.000889516	ENSG00000155816	0.000104312	ENSG00000165061	0.000999777	ENSG00000159216	2.45e-06	ENSG00000169862	0.000272402	ENSG00000206503	0.000458314	ENSG00000253731	1.68e-09					ENSG00000185565	0.000205145									ENSG00000151952	5.43e-05	ENSG00000153707	1.69e-08			ENSG00000253485	5.29e-08
ENSG00000198626	2.91e-05	ENSG00000156011	0.000868705	ENSG00000165084	0.000263693	ENSG00000162105	0.000426165	ENSG00000169946	0.000148484	ENSG00000239389	0.000238229	ENSG00000253767	1.44e-07					ENSG00000185737	0.00040543									ENSG00000152061	0.000271191	ENSG00000154162	6.45e-07			ENSG00000253537	1.14e-06
ENSG00000198838	0.000128374	ENSG00000156103	0.000844575	ENSG00000165659	0.000211056	ENSG00000162849	0.000704561	ENSG00000170579	0.000348379	ENSG00000249158	1.02e-06	ENSG00000253846	6.5e-06					ENSG00000185774	0.000799354									ENSG00000152208	2.11e-05	ENSG00000154646	0.000590228			ENSG00000253731	1.62e-07
ENSG00000204956	1.55e-15	ENSG00000156113	0.000288994	ENSG00000165973	0.00010813	ENSG00000163116	2.05e-05	ENSG00000170624	0.000288322	ENSG00000250120	2.92e-08	ENSG00000253873	9.93e-05					ENSG00000186094	0.000725589									ENSG00000152377	0.000477753	ENSG00000154654	8.77e-05			ENSG00000253767	1.73e-06
ENSG00000204961	5.01e-12	ENSG00000156395	0.000200083	ENSG00000166206	6.92e-05	ENSG00000164199	0.000391866	ENSG00000171094	0.000257356	ENSG00000250349	5.03e-07	ENSG00000253910	1.41e-10					ENSG00000186153	0.000597754									ENSG00000152402	0.000881553	ENSG00000154655	0.000230424			ENSG00000253846	3.61e-05
ENSG00000204962	1.72e-12	ENSG00000156475	0.000919045	ENSG00000166748	4.71e-06	ENSG00000164418	0.000647985	ENSG00000171587	0.000145691	ENSG00000251664	3.21e-05	ENSG00000253953	2.5e-08					ENSG00000186472	0.000658595									ENSG00000152953	0.000386382	ENSG00000154678	1.9e-05			ENSG00000253873	0.000277678
ENSG00000204963	8.1e-15	ENSG00000156687	4.33e-05	ENSG00000166960	0.00013515	ENSG00000164588	1.88e-05	ENSG00000171735	0.000299446	ENSG00000253305	3.21e-05	ENSG00000254122	2.04e-05					ENSG00000187323	0.000333799									ENSG00000153707	1.7e-05	ENSG00000154864	7.72e-05			ENSG00000253910	3.02e-08
ENSG00000204965	1.11e-16	ENSG00000157168	1.69e-05	ENSG00000168702	2.12e-08	ENSG00000164741	0.000704561	ENSG00000172260	0.000166397	ENSG00000253485	3.77e-10	ENSG00000254221	4.85e-11					ENSG00000187391	0.000226143									ENSG00000153823	0.000489151	ENSG00000154928	1.76e-05			ENSG00000253953	1.14e-06
ENSG00000204967	0	ENSG00000157445	5.13e-05	ENSG00000168843	7.81e-07	ENSG00000164796	3.42e-08	ENSG00000172264	2.57e-05	ENSG00000253537	5.03e-07	ENSG00000254245	1.67e-11					ENSG00000188107	8.52e-05									ENSG00000153956	0.000881553	ENSG00000154975	0.000761012			ENSG00000254122	9.39e-05
ENSG00000204969	0	ENSG00000157680	0.000754552	ENSG00000168959	4.43e-05	ENSG00000165973	5.65e-05	ENSG00000172987	0.000527899	ENSG00000253729	0.000874415	ENSG00000255408	1.47e-14					ENSG00000188580	0.000597754									ENSG00000154162	2.37e-05	ENSG00000155011	0.000956563			ENSG00000254221	1.3e-08
ENSG00000204970	0	ENSG00000157985	0.000189074	ENSG00000169306	1.53e-06	ENSG00000166157	0.000360318	ENSG00000173406	0.000105471	ENSG00000253731	2.92e-08	ENSG00000255872	0.00082476					ENSG00000188641	0.000542505									ENSG00000154654	3.46e-05	ENSG00000155052	5.98e-07			ENSG00000254245	4.2e-09
ENSG00000205038	0.000209314	ENSG00000158258	0.000258092	ENSG00000169436	0.000329413	ENSG00000166748	0.000155409	ENSG00000173482	0.000262277	ENSG00000253767	1.02e-06	ENSG00000257335	0.000738707					ENSG00000189108	0.000597754									ENSG00000154678	0.000881553	ENSG00000155093	4.94e-06			ENSG00000255408	4.38e-10
ENSG00000206503	2.91e-05	ENSG00000158321	0.000372682	ENSG00000169760	0.00010813	ENSG00000166833	0.00046345	ENSG00000174469	5.45e-06	ENSG00000253846	0.000238229	ENSG00000258864	5.08e-12					ENSG00000196090	0.000302857									ENSG00000154864	0.000946059	ENSG00000155511	0.000161406			ENSG00000261934	1.82e-05
ENSG00000212127	4.79e-05	ENSG00000159216	0.00035221	ENSG00000169855	1.45e-05	ENSG00000167346	0.00076605	ENSG00000174473	0.000120483	ENSG00000253910	8.7e-11	ENSG00000261934	1.3e-06					ENSG00000196569	0.000969979									ENSG00000154928	0.00035998	ENSG00000155816	0.00014955			ENSG00000262209	1.23e-07
ENSG00000234745	0.000209314	ENSG00000160145	0.000522967	ENSG00000169862	4.98e-07	ENSG00000167632	0.000331299	ENSG00000174482	0.000234097	ENSG00000253953	5.03e-07	ENSG00000262209	9.31e-10					ENSG00000198626	0.000153103									ENSG00000154975	0.000185849	ENSG00000155849	0.000393003			ENSG00000262576	1.49e-08
ENSG00000239389	0.000128374	ENSG00000162105	0.000467139	ENSG00000169933	0.000800979	ENSG00000168038	0.000832876	ENSG00000175161	0.000217006	ENSG00000254221	2.16e-12	ENSG00000262576	7.79e-11					ENSG00000198947	9.39e-05									ENSG00000155052	2.87e-05	ENSG00000155897	0.000364145
ENSG00000241635	0.000551136	ENSG00000162599	0.000655354	ENSG00000170396	0.000329413	ENSG00000168702	2.65e-08	ENSG00000175497	1.72e-05	ENSG00000254245	1.22e-15							ENSG00000204442	0.000542505									ENSG00000155093	7.05e-05	ENSG00000155966	0.000346094
ENSG00000242515	0.000551136	ENSG00000162670	0.000138478	ENSG00000170579	1.81e-05	ENSG00000168843	6.24e-06	ENSG00000175600	0.000537954	ENSG00000255408	0							ENSG00000204956	0.000153103									ENSG00000155511	0.000696583	ENSG00000156103	4.76e-05
ENSG00000249158	1.82e-07	ENSG00000162687	0.000893522	ENSG00000170624	0.000641594	ENSG00000168959	0.00054804	ENSG00000176204	0.000127551	ENSG00000257335	0.000458314							ENSG00000204963	0.000969979									ENSG00000155816	0.000130374	ENSG00000156113	0.000355005
ENSG00000250120	4.8e-09	ENSG00000163116	4.99e-05	ENSG00000170927	0.000263693	ENSG00000169306	2.25e-07	ENSG00000176406	0.000107496	ENSG00000261934	3.21e-05							ENSG00000204965	0.000597754									ENSG00000155849	0.00027767	ENSG00000156395	6.14e-05
ENSG00000250349	0.000551136	ENSG00000164176	0.00029728	ENSG00000171094	0.00010813	ENSG00000169760	0.000503982	ENSG00000176571	0.000190032	ENSG00000262209	6.92e-09							ENSG00000204967	0.000226143									ENSG00000155966	0.000680365	ENSG00000156475	0.000230424
ENSG00000251664	8.49e-07	ENSG00000164199	0.000674095	ENSG00000171587	1.45e-05	ENSG00000169855	8.04e-06	ENSG00000176771	0.000341852	ENSG00000262576	4.53e-12							ENSG00000204969	0.000153103									ENSG00000156103	0.000327556	ENSG00000156687	0.000355005
ENSG00000253305	1.77e-05	ENSG00000164418	3.65e-05	ENSG00000171723	0.000641594	ENSG00000169862	0.000503982	ENSG00000177694	7.93e-05	ENSG00000269476	0.000458314							ENSG00000204970	0.000153103									ENSG00000156113	0.000713187	ENSG00000157168	3.08e-07
ENSG00000253485	2.47e-11	ENSG00000164588	0.000332859	ENSG00000171735	5.53e-05	ENSG00000169933	0.000595931	ENSG00000178568	0.000127551									ENSG00000250349	0.000205145									ENSG00000156218	0.000395605	ENSG00000157445	5.01e-05
ENSG00000253537	2.29e-08	ENSG00000164741	0.000776119	ENSG00000172260	0.000263693	ENSG00000170044	0.000595931	ENSG00000179242	6.43e-05									ENSG00000250588	0.000969979									ENSG00000156395	0.000127328	ENSG00000157680	0.000909166
ENSG00000253729	0.000209314	ENSG00000164796	5.28e-06	ENSG00000172264	3.17e-07	ENSG00000170579	0.000131309	ENSG00000179399	1.54e-05									ENSG00000253350	0.000597754									ENSG00000156687	0.000305166	ENSG00000158258	0.000780599
ENSG00000253731	9.95e-10	ENSG00000165084	0.00029728	ENSG00000172554	0.000211056	ENSG00000170624	9.37e-05	ENSG00000179603	8.72e-05									ENSG00000254221	0.000799354									ENSG00000157168	2.49e-05	ENSG00000158321	2.46e-05
ENSG00000253767	1.82e-07	ENSG00000165323	0.000104312	ENSG00000172915	0.000513835	ENSG00000170745	0.00046345	ENSG00000179869	0.00022539									ENSG00000254245	0.000492338									ENSG00000157445	7.93e-05	ENSG00000159216	1.48e-05
ENSG00000253846	4.79e-05	ENSG00000165659	0.000155087	ENSG00000172987	4.43e-05	ENSG00000170927	7.92e-05	ENSG00000179915	0.00015133									ENSG00000255408	0.000205145									ENSG00000157680	0.000240992	ENSG00000160145	0.000909166
ENSG00000253910	8.52e-12	ENSG00000165973	3.86e-05	ENSG00000173406	1.81e-05	ENSG00000171094	0.000704561	ENSG00000180287	0.000212931									ENSG00000272781	0.000302857									ENSG00000158258	0.000157514	ENSG00000162105	0.000761012
ENSG00000253953	2.29e-08	ENSG00000166206	0.000250896	ENSG00000173482	0.000641594	ENSG00000171435	0.000360318	ENSG00000181234	0.000113805																			ENSG00000158321	3.15e-05	ENSG00000162687	2.59e-05
ENSG00000254122	0.000209314	ENSG00000166748	4.45e-05	ENSG00000174469	2.78e-09	ENSG00000171587	0.000200062	ENSG00000181722	0.000964558																			ENSG00000159216	0.000190292	ENSG00000162849	0.000364145
ENSG00000254221	3.47e-13	ENSG00000166833	0.000454137	ENSG00000174473	3.98e-07	ENSG00000171735	0.000110936	ENSG00000181804	0.000257356																			ENSG00000162670	0.000165138	ENSG00000163092	0.000519791
ENSG00000254245	4.66e-15	ENSG00000166960	0.000776119	ENSG00000174482	0.00010813	ENSG00000171862	0.000169064	ENSG00000182050	0.000166397																			ENSG00000162687	0.000730186	ENSG00000163116	7.82e-06
ENSG00000255408	0	ENSG00000167632	0.000945294	ENSG00000175161	7.81e-07	ENSG00000172260	1.59e-05	ENSG00000182348	0.000687378																			ENSG00000163116	0.000139956	ENSG00000163288	3.69e-05
ENSG00000255872	0.000340223	ENSG00000168702	3.34e-06	ENSG00000175471	0.000263693	ENSG00000172264	3.44e-07	ENSG00000182463	0.000928958																			ENSG00000163288	0.000327556	ENSG00000164176	1.15e-05
ENSG00000261934	6.47e-06	ENSG00000168843	1.85e-05	ENSG00000175497	3.49e-09	ENSG00000172554	0.000110936	ENSG00000182601	0.000243139																			ENSG00000164176	0.000434748	ENSG00000164418	0.00029713
ENSG00000262209	3.47e-10	ENSG00000168959	0.000362302	ENSG00000176204	9.23e-06	ENSG00000172987	0.000155409	ENSG00000182621	0.000267292																			ENSG00000164330	0.000881553	ENSG00000164588	7.43e-06
ENSG00000262576	1.72e-12	ENSG00000169306	2.45e-05	ENSG00000176406	5.53e-05	ENSG00000173406	2.9e-06	ENSG00000182667	7.93e-05																			ENSG00000164418	0.000143304	ENSG00000164741	0.000424146
		ENSG00000169744	0.00097229	ENSG00000176571	8.65e-05	ENSG00000173482	9.37e-05	ENSG00000182674	0.000637468																			ENSG00000164588	0.000664524	ENSG00000164796	3.04e-08
		ENSG00000169760	2.6e-05	ENSG00000176771	0.000211056	ENSG00000174469	5.57e-10	ENSG00000182771	0.000201157																			ENSG00000164796	1.87e-05	ENSG00000164830	0.00080069
		ENSG00000169851	8.08e-05	ENSG00000177182	0.000999777	ENSG00000174473	8.08e-07	ENSG00000182901	5.85e-05																			ENSG00000165061	0.000680365	ENSG00000165323	7.15e-05
		ENSG00000169855	6.82e-06	ENSG00000177694	9.23e-06	ENSG00000174482	5.65e-05	ENSG00000183098	0.000101535																			ENSG00000165084	0.000219268	ENSG00000165379	0.00018329
		ENSG00000169862	3.65e-05	ENSG00000178568	7.81e-07	ENSG00000175161	5.75e-07	ENSG00000183117	2.89e-06																			ENSG00000165323	0.000235368	ENSG00000165966	0.000519791
		ENSG00000169946	7.86e-05	ENSG00000179242	4.43e-05	ENSG00000175471	0.000984417	ENSG00000183166	0.000120483																			ENSG00000165379	0.000305166	ENSG00000165973	5.82e-07
		ENSG00000170381	0.0002439	ENSG00000179399	4.98e-07	ENSG00000175497	1.04e-07	ENSG00000183230	2.57e-05																			ENSG00000165973	5.18e-05	ENSG00000166157	0.00014955
		ENSG00000170558	0.000919045	ENSG00000179603	3.01e-06	ENSG00000175600	1.73e-05	ENSG00000183454	0.000799147																			ENSG00000165995	0.000512769	ENSG00000166501	7.34e-05
		ENSG00000170579	0.000142456	ENSG00000179869	0.000411449	ENSG00000175894	0.000595931	ENSG00000183715	2.25e-05																			ENSG00000166157	0.000991657	ENSG00000166748	2.65e-05
		ENSG00000170624	5.28e-05	ENSG00000179915	1.22e-06	ENSG00000176204	3.44e-06	ENSG00000184226	0.000148484																			ENSG00000166206	0.000219268	ENSG00000166833	6.97e-05
		ENSG00000170959	0.000250896	ENSG00000181234	5.53e-05	ENSG00000176406	0.000217622	ENSG00000184304	0.000569278																			ENSG00000166501	0.000821434	ENSG00000166960	0.000218999
		ENSG00000171094	0.000537933	ENSG00000181355	1.45e-05	ENSG00000176571	6.24e-06	ENSG00000184305	3.92e-05																			ENSG00000166748	4.83e-05	ENSG00000167281	0.00098118
		ENSG00000171587	5.75e-05	ENSG00000182050	4.71e-06	ENSG00000176771	6.14e-05	ENSG00000184347	0.000814331																			ENSG00000167632	0.000747588	ENSG00000167632	0.000590228
		ENSG00000171735	0.000362302	ENSG00000182256	4.43e-05	ENSG00000177694	3.16e-06	ENSG00000184672	0.00022539																			ENSG00000168702	1.06e-05	ENSG00000168038	0.000761012
		ENSG00000172260	5.28e-05	ENSG00000182348	8.65e-05	ENSG00000178568	1.34e-05	ENSG00000184903	0.000489512																			ENSG00000168843	4.19e-05	ENSG00000168702	2.48e-08
		ENSG00000172264	4.98e-06	ENSG00000182463	0.000513835	ENSG00000179242	0.000101964	ENSG00000185008	2.01e-05																			ENSG00000168959	0.000271191	ENSG00000168843	4.35e-06
		ENSG00000172554	0.000480513	ENSG00000182601	0.000329413	ENSG00000179399	8.8e-07	ENSG00000185046	0.000113805																			ENSG00000169306	4.39e-05	ENSG00000168959	2.86e-05
		ENSG00000172572	0.00069337	ENSG00000182621	0.000329413	ENSG00000179603	2.87e-05	ENSG00000185053	6.68e-05																			ENSG00000169760	0.000118608	ENSG00000169282	0.000821297
		ENSG00000172915	0.000655354	ENSG00000182667	3.17e-07	ENSG00000179869	0.000131309	ENSG00000185274	0.000107496																			ENSG00000169855	3.3e-05	ENSG00000169306	0.000110216
		ENSG00000172987	0.000250896	ENSG00000182674	0.000800979	ENSG00000179915	6.69e-05	ENSG00000185345	3.3e-05																			ENSG00000169862	7.05e-05	ENSG00000169744	3.01e-05
		ENSG00000173068	0.000155087	ENSG00000182732	0.00010813	ENSG00000181143	3.4e-05	ENSG00000185420	0.000412992																			ENSG00000169933	0.000861041	ENSG00000169760	6.8e-05
		ENSG00000173406	2.01e-05	ENSG00000182771	0.000263693	ENSG00000181234	0.000984417	ENSG00000185532	5.52e-05																			ENSG00000169946	0.000219268	ENSG00000169855	5.07e-06
		ENSG00000173482	8.08e-05	ENSG00000182901	1.45e-05	ENSG00000181355	0.000155409	ENSG00000185565	1.32e-05																			ENSG00000170396	0.000537524	ENSG00000169862	4.64e-05
		ENSG00000174469	3.86e-06	ENSG00000183098	5.9e-06	ENSG00000181722	0.000595931	ENSG00000185736	0.000687378																			ENSG00000170579	0.000121446	ENSG00000169946	8.77e-05
		ENSG00000174473	1.65e-05	ENSG00000183117	5.96e-11	ENSG00000181804	0.000595931	ENSG00000185737	0.000113805																			ENSG00000170624	5.31e-05	ENSG00000170396	6.14e-05
		ENSG00000174482	6.26e-05	ENSG00000183166	0.000263693	ENSG00000182050	4.83e-06	ENSG00000185774	2.89e-05																			ENSG00000170745	0.00064905	ENSG00000170579	8.99e-05
		ENSG00000175161	6.44e-06	ENSG00000183230	8.22e-08	ENSG00000182256	0.000647985	ENSG00000185942	0.000277609																			ENSG00000170959	0.000319916	ENSG00000170624	4.09e-05
		ENSG00000175471	0.000821113	ENSG00000183454	0.000999777	ENSG00000182348	0.000200062	ENSG00000186094	7.49e-05																			ENSG00000171094	0.000802317	ENSG00000170959	0.000337406
		ENSG00000175497	5.43e-06	ENSG00000183662	0.000411449	ENSG00000182463	0.000360318	ENSG00000186153	0.000262277																			ENSG00000171587	0.000169087	ENSG00000170962	0.00063699
		ENSG00000175600	0.000537933	ENSG00000183715	1.03e-07	ENSG00000182621	0.000257482	ENSG00000186487	0.000348379																			ENSG00000171735	0.000252647	ENSG00000171094	0.00019782
		ENSG00000176204	7.42e-06	ENSG00000183783	0.000329413	ENSG00000182667	0.000391866	ENSG00000187323	2.17e-05																			ENSG00000172260	7.05e-05	ENSG00000171587	0.000142134
		ENSG00000176406	0.000250896	ENSG00000184005	0.000800979	ENSG00000182771	0.000984417	ENSG00000187391	3.43e-05																			ENSG00000172264	3.23e-05	ENSG00000171735	5.84e-05
		ENSG00000176571	2.52e-05	ENSG00000184156	0.000513835	ENSG00000183098	1.46e-05	ENSG00000187416	0.000527899																			ENSG00000172554	0.000113129	ENSG00000172260	2.19e-06
		ENSG00000176771	5.13e-05	ENSG00000184226	0.000513835	ENSG00000183117	1.03e-08	ENSG00000187672	0.000569278																			ENSG00000172915	0.000343386	ENSG00000172264	4.4e-07
		ENSG00000177694	9.32e-06	ENSG00000184304	0.000641594	ENSG00000183166	2.05e-05	ENSG00000187720	0.000946592																			ENSG00000172987	0.000229874	ENSG00000172987	0.0002135
		ENSG00000178031	0.000945294	ENSG00000184305	6.56e-08	ENSG00000183230	3.75e-07	ENSG00000188107	1.97e-05																			ENSG00000173406	4.09e-05	ENSG00000173406	5.76e-06
		ENSG00000178568	8.32e-06	ENSG00000184408	0.000411449	ENSG00000183454	0.000905499	ENSG00000188580	5.85e-05																			ENSG00000173482	0.000181509	ENSG00000173482	0.00046954
		ENSG00000179104	0.000305802	ENSG00000184588	0.000513835	ENSG00000183715	4.03e-05	ENSG00000188641	0.000397674																			ENSG00000174469	1.11e-05	ENSG00000174469	6.52e-08
		ENSG00000179242	0.000164122	ENSG00000184611	4.71e-06	ENSG00000184226	1.59e-05	ENSG00000189056	0.000437075																			ENSG00000174473	4.09e-05	ENSG00000174473	1.63e-07
		ENSG00000179399	9.59e-06	ENSG00000184613	0.000999777	ENSG00000184305	5.75e-07	ENSG00000189283	0.000163269																			ENSG00000174482	0.000204268	ENSG00000174482	4.7e-06
		ENSG00000179603	9.31e-05	ENSG00000184672	1.53e-06	ENSG00000184347	0.000217622	ENSG00000196090	0.000115989																			ENSG00000175161	4.19e-05	ENSG00000175161	1.9e-07
		ENSG00000179915	1.08e-05	ENSG00000184903	3.54e-05	ENSG00000184672	0.000101964	ENSG00000196104	0.000741172																			ENSG00000175471	0.000730186	ENSG00000175497	4.12e-08
		ENSG00000181234	0.00097229	ENSG00000185008	6.24e-07	ENSG00000184903	0.000142854	ENSG00000196277	0.000120483																			ENSG00000175497	1.87e-05	ENSG00000175600	0.000157353
		ENSG00000181355	0.000480513	ENSG00000185046	1.45e-05	ENSG00000184985	0.000503982	ENSG00000196353	0.000375751																			ENSG00000175600	5.83e-05	ENSG00000176204	8.23e-06
		ENSG00000182050	1.2e-05	ENSG00000185053	3.98e-07	ENSG00000185008	2.23e-08	ENSG00000196482	0.000946592																			ENSG00000176204	3.3e-05	ENSG00000176406	0.000424146
		ENSG00000182168	0.000569159	ENSG00000185274	0.000999777	ENSG00000185046	7.28e-05	ENSG00000196569	0.0005482																			ENSG00000176406	6.41e-05	ENSG00000176571	6.29e-07
		ENSG00000182256	7.64e-05	ENSG00000185345	2.26e-05	ENSG00000185053	1.24e-06	ENSG00000197826	0.000480357																			ENSG00000176571	3.81e-05	ENSG00000176771	0.000118955
		ENSG00000182348	9.86e-05	ENSG00000185352	2.83e-05	ENSG00000185274	0.000200062	ENSG00000198216	0.000569278																			ENSG00000176769	0.000377373	ENSG00000177182	6.97e-05
		ENSG00000182621	0.000155087	ENSG00000185532	3.54e-05	ENSG00000185345	1.23e-05	ENSG00000198597	0.000172834																			ENSG00000176771	0.000150242	ENSG00000177694	4.03e-06
		ENSG00000182667	3.17e-05	ENSG00000185565	4.18e-08	ENSG00000185352	0.000280059	ENSG00000198626	1.24e-05																			ENSG00000177694	3.81e-05	ENSG00000178568	2.36e-06
		ENSG00000182732	0.000945294	ENSG00000185736	0.000329413	ENSG00000185420	0.000169064	ENSG00000198838	0.000282915																			ENSG00000178568	2.67e-05	ENSG00000179242	3.64e-06
		ENSG00000182771	0.000332859	ENSG00000185737	7.81e-07	ENSG00000185532	2.06e-06	ENSG00000204442	0.000341852																			ENSG00000179242	3.3e-05	ENSG00000179399	1.42e-06
		ENSG00000182901	0.000405637	ENSG00000185774	8.22e-08	ENSG00000185565	1.47e-07	ENSG00000204740	0.000613881																			ENSG00000179399	3.81e-05	ENSG00000179603	3.21e-06
		ENSG00000183023	0.00097229	ENSG00000185942	4.71e-06	ENSG00000185736	2.42e-05	ENSG00000204970	0.00087799																			ENSG00000179603	5.31e-05	ENSG00000179869	1.64e-05
		ENSG00000183032	0.000454137	ENSG00000186094	1.92e-06	ENSG00000185737	4.38e-05	ENSG00000206579	0.000229703																			ENSG00000179869	0.000298047	ENSG00000179915	5.91e-06
		ENSG00000183098	1.24e-05	ENSG00000186153	0.000263693	ENSG00000185760	0.000217622	ENSG00000218336	0.000257356																			ENSG00000179915	2.49e-05	ENSG00000180287	0.00080069
		ENSG00000183117	1.38e-06	ENSG00000186439	0.000641594	ENSG00000185774	4.83e-06	ENSG00000250588	0.000397674																			ENSG00000180287	0.000235368	ENSG00000181234	1.37e-05
		ENSG00000183166	0.00035221	ENSG00000186472	0.00010813	ENSG00000186094	6.24e-06	ENSG00000253350	4.65e-05																			ENSG00000181234	0.000150242	ENSG00000181355	0.000546897
		ENSG00000183230	6.26e-06	ENSG00000186487	0.000211056	ENSG00000186153	3.4e-05	ENSG00000272781	0.000101535																			ENSG00000181355	0.000351586	ENSG00000181722	0.000337406
		ENSG00000183580	0.000178669	ENSG00000187323	4.98e-07	ENSG00000186472	0.000360318																					ENSG00000181722	0.000680365	ENSG00000182050	2.36e-06
		ENSG00000183662	0.000250896	ENSG00000187391	2.26e-05	ENSG00000186487	0.000360318																					ENSG00000182050	5.56e-05	ENSG00000182185	0.000373521
		ENSG00000183715	8.81e-06	ENSG00000187398	1.81e-05	ENSG00000187323	5.73e-06																					ENSG00000182256	5.06e-05	ENSG00000182348	0.000506745
		ENSG00000184005	0.000893522	ENSG00000187546	0.000800979	ENSG00000187391	4.08e-06																					ENSG00000182348	0.000133493	ENSG00000182667	3.93e-06
		ENSG00000184226	0.000138478	ENSG00000188107	3.33e-08	ENSG00000187398	0.000647985																					ENSG00000182463	0.00092405	ENSG00000182674	4.19e-05
		ENSG00000184304	9.31e-05	ENSG00000188580	4.43e-05	ENSG00000187672	0.00046345																					ENSG00000182601	0.000146732	ENSG00000182732	2.16e-05
		ENSG00000184305	8.32e-06	ENSG00000188641	0.000211056	ENSG00000187720	0.000257482																					ENSG00000182621	0.000489151	ENSG00000182771	8.23e-06
		ENSG00000184347	0.000417255	ENSG00000189056	0.00010813	ENSG00000188107	2.88e-08																					ENSG00000182667	2.32e-05	ENSG00000182901	4.58e-06
		ENSG00000184408	0.000441495	ENSG00000189108	0.00010813	ENSG00000188580	4.83e-06																					ENSG00000182732	0.000161281	ENSG00000183023	0.0004135
		ENSG00000184611	0.000733583	ENSG00000189283	1.53e-06	ENSG00000188641	5.19e-05																					ENSG00000182771	0.000319916	ENSG00000183098	6.54e-06
		ENSG00000184672	7.86e-05	ENSG00000196090	9.23e-06	ENSG00000189056	0.000647985																					ENSG00000182901	0.000512769	ENSG00000183117	1.24e-08
		ENSG00000184903	0.000150757	ENSG00000196104	0.000329413	ENSG00000189108	1.24e-06																					ENSG00000183023	0.000783644	ENSG00000183166	0.000178688
		ENSG00000184985	0.000713194	ENSG00000196277	5.9e-06	ENSG00000189283	5.26e-06																					ENSG00000183098	3.38e-05	ENSG00000183230	3.08e-07
		ENSG00000185008	1.89e-06	ENSG00000196353	8.65e-05	ENSG00000196090	1.04e-05																					ENSG00000183117	1.16e-05	ENSG00000183454	2.22e-05
		ENSG00000185046	2.75e-05	ENSG00000196482	1.45e-05	ENSG00000196104	0.000647985																					ENSG00000183166	4.71e-05	ENSG00000183662	0.000956563
		ENSG00000185053	9.32e-06	ENSG00000196569	0.000641594	ENSG00000196277	2.87e-05																					ENSG00000183230	2.06e-05	ENSG00000183715	1.13e-06
		ENSG00000185274	0.000146548	ENSG00000198216	0.000211056	ENSG00000196353	0.000360318																					ENSG00000183580	0.00020915	ENSG00000183783	0.000519791
		ENSG00000185345	1.95e-05	ENSG00000198597	8.65e-05	ENSG00000196482	0.000236718																					ENSG00000183662	0.000633936	ENSG00000184156	0.000687456
		ENSG00000185352	9.31e-05	ENSG00000198626	7.38e-06	ENSG00000196565	4.38e-05																					ENSG00000183715	3.55e-05	ENSG00000184226	2.16e-05
		ENSG00000185532	1.65e-05	ENSG00000198673	0.000513835	ENSG00000196569	0.000984417																					ENSG00000184005	0.000783644	ENSG00000184305	3.13e-06
		ENSG00000185565	2.12e-06	ENSG00000198838	0.000999777	ENSG00000197826	0.000304608																					ENSG00000184156	0.000525001	ENSG00000184408	0.000346094
		ENSG00000185737	8.32e-06	ENSG00000198947	5.48e-09	ENSG00000197959	0.00076605																					ENSG00000184226	4.29e-05	ENSG00000184611	0.000346094
		ENSG00000185774	6.26e-06	ENSG00000204442	4.43e-05	ENSG00000198626	1.89e-07																					ENSG00000184304	0.00020915	ENSG00000184613	0.000761012
		ENSG00000185942	0.000127197	ENSG00000206579	0.000329413	ENSG00000198838	0.000155409																					ENSG00000184305	2.87e-05	ENSG00000184672	4.7e-06
		ENSG00000186094	1.69e-05	ENSG00000218336	0.000999777	ENSG00000198947	2.05e-08																					ENSG00000184347	0.000335378	ENSG00000184903	0.000304781
		ENSG00000186153	0.000104312	ENSG00000221866	0.000329413	ENSG00000204442	0.000217622																					ENSG00000184408	0.000563471	ENSG00000184985	0.000174201
		ENSG00000186439	0.000754552	ENSG00000231171	0.000999777	ENSG00000204740	0.000503982																					ENSG00000184672	0.000115837	ENSG00000185008	3.45e-08
		ENSG00000186472	9.05e-05	ENSG00000250349	5.53e-05	ENSG00000204956	3.4e-05																					ENSG00000184903	0.000100512	ENSG00000185046	1.15e-05
		ENSG00000186487	0.000178669	ENSG00000250588	0.00013515	ENSG00000204967	0.000503982																					ENSG00000184985	0.000633936	ENSG00000185053	1.08e-07
		ENSG00000187323	1.11e-05	ENSG00000253350	6.92e-05	ENSG00000204969	0.000155409																					ENSG00000185008	1.62e-05	ENSG00000185274	0.000533172
		ENSG00000187391	1.69e-05	ENSG00000272781	7.38e-06	ENSG00000204970	5.65e-05																					ENSG00000185046	3.99e-05	ENSG00000185345	2.13e-06
		ENSG00000187398	3.08e-05	ENSG00000273079	0.000800979	ENSG00000205754	0.000426165																					ENSG00000185053	1.87e-05	ENSG00000185352	4.76e-05
		ENSG00000187546	0.000273107			ENSG00000213931	0.000905499																					ENSG00000185274	2.61e-05	ENSG00000185420	0.000446267
		ENSG00000187672	0.000168834			ENSG00000218336	0.000169064																					ENSG00000185345	7.39e-05	ENSG00000185532	2.65e-07
		ENSG00000187720	0.000314568			ENSG00000221866	0.000142854																					ENSG00000185352	0.000327556	ENSG00000185565	8.85e-08
		ENSG00000188107	3.54e-06			ENSG00000250349	1.14e-06																					ENSG00000185420	0.000604752	ENSG00000185736	0.000393003
		ENSG00000188580	2.19e-05			ENSG00000250588	3.12e-05																					ENSG00000185532	8.93e-05	ENSG00000185737	4.18e-07
		ENSG00000188641	0.000134611			ENSG00000253350	0.000131309																					ENSG00000185565	2.06e-05	ENSG00000185760	0.000346094
		ENSG00000188803	0.000919045			ENSG00000253485	0.00046345																					ENSG00000185666	0.000696583	ENSG00000185774	1.7e-06
		ENSG00000189108	1.9e-05			ENSG00000253731	0.000984417																					ENSG00000185736	0.000190292	ENSG00000185942	1.98e-06
		ENSG00000189283	2.32e-05			ENSG00000253910	0.000331299																					ENSG00000185737	4.09e-05	ENSG00000186094	4.94e-06
		ENSG00000196090	2.38e-05			ENSG00000254221	0.000200062																					ENSG00000185774	3.23e-05	ENSG00000186153	4.3e-05
		ENSG00000196104	0.000332859			ENSG00000254245	7.92e-05																					ENSG00000185942	0.000219268	ENSG00000186439	9.22e-05
		ENSG00000196277	3.45e-05			ENSG00000255408	0.000217622																					ENSG00000186094	3.99e-05	ENSG00000186487	0.000224639
		ENSG00000196353	0.000194501			ENSG00000257046	0.000426165																					ENSG00000186153	5.18e-05	ENSG00000186952	0.000687456
		ENSG00000196482	0.000104312			ENSG00000262209	0.00076605																					ENSG00000186487	5.18e-05	ENSG00000187323	5e-07
		ENSG00000196569	0.000217808			ENSG00000262576	0.000217622																					ENSG00000186952	0.000466619	ENSG00000187391	7.14e-07
		ENSG00000197584	0.000655354			ENSG00000272781	1.04e-05																					ENSG00000187323	5.56e-05	ENSG00000187398	0.000605421
		ENSG00000198597	0.000919045																									ENSG00000187391	2.16e-05	ENSG00000187546	0.000842435
		ENSG00000198626	3.26e-05																									ENSG00000187398	0.000821434	ENSG00000187672	0.000188011
		ENSG00000198673	0.000480513																									ENSG00000187416	0.000434748	ENSG00000188107	2.12e-08
		ENSG00000198947	6.63e-06																									ENSG00000187672	0.000143304	ENSG00000188580	3.37e-06
		ENSG00000204442	3.55e-05																									ENSG00000188107	1.51e-05	ENSG00000188641	5.14e-05
		ENSG00000204740	0.000116832																									ENSG00000188580	6.41e-05	ENSG00000189108	1.4e-05
		ENSG00000206052	0.000494268																									ENSG00000188641	0.000305166	ENSG00000189283	9.83e-06
		ENSG00000218336	0.000113568																									ENSG00000189056	0.000680365	ENSG00000196090	6.06e-06
		ENSG00000248874	0.000383359																									ENSG00000189108	0.000136686	ENSG00000196104	0.000153402
		ENSG00000250349	0.000127197																									ENSG00000189283	7.05e-05	ENSG00000196277	4.88e-05
		ENSG00000250588	7.01e-05																									ENSG00000196090	4.29e-05	ENSG00000196353	0.000188011
		ENSG00000253350	1.9e-05																									ENSG00000196104	0.000351586	ENSG00000196569	0.00029713
		ENSG00000254709	0.0002439																									ENSG00000196277	0.000139956	ENSG00000197410	0.000932564
		ENSG00000272781	3.17e-05																									ENSG00000196353	0.000258683	ENSG00000197826	0.000337406
																												ENSG00000196482	0.000765404	ENSG00000198216	0.000320679
																												ENSG00000197826	0.000319916	ENSG00000198589	0.000446267
																												ENSG00000198597	7.39e-05	ENSG00000198597	0.0004135
																												ENSG00000198626	5.56e-05	ENSG00000198626	7.91e-07
																												ENSG00000198673	0.000861041	ENSG00000198673	0.00014955
																												ENSG00000198838	0.000173131	ENSG00000198838	0.000337406
																												ENSG00000198947	1.66e-05	ENSG00000198947	7.51e-07
																												ENSG00000204442	0.000240992	ENSG00000204442	2.62e-06
																												ENSG00000204740	0.000121446	ENSG00000204740	0.000188011
																												ENSG00000206579	0.000271191	ENSG00000206052	0.0007233
																												ENSG00000218336	9.59e-05	ENSG00000206579	1.17e-05
																												ENSG00000219438	0.000386382	ENSG00000218336	0.000102119
																												ENSG00000221866	0.000377373	ENSG00000221866	0.000621005
																												ENSG00000237515	0.000537524	ENSG00000235531	0.000138565
																												ENSG00000250349	0.000512769	ENSG00000237515	0.0004135
																												ENSG00000250588	7.93e-05	ENSG00000250349	0.000424146
																												ENSG00000253350	3.15e-05	ENSG00000250588	7.82e-06
																												ENSG00000272781	2.11e-05	ENSG00000253350	2.03e-06
																														ENSG00000259030	0.00063699
																														ENSG00000272781	2.16e-07
																														ENSG00000273079	0.000304781

## Sheet: Supplementary Table S2
Table S2. Complete list of samples with their cancer type and identified subtypes.
icgc_sample_id	cancer_type	subtype
SA1053	Bladder	C7
SA1115	Bladder	C15
SA1181	Bladder	C13
SA1259	Bladder	C13
SA1337	Bladder	C13
SA1358	Bladder	C7
SA1421	Bladder	C13
SA1487	Bladder	C15
SA1496	Bladder	C13
SA1556	Bladder	C15
SA1595	Bladder	C6
SA1628	Bladder	C13
SA1661	Bladder	C13
SA1694	Bladder	C15
SA1727	Bladder	C15
SA1778	Bladder	C12
SA1844	Bladder	C15
SA1907	Bladder	C15
SA1910	Bladder	C6
SA1976	Bladder	C7
SA1979	Bladder	C15
SA2042	Bladder	C13
SA2105	Bladder	C6
SA2135	Bladder	C7
SA2174	Bladder	C7
SA2201	Bladder	C6
SA2243	Bladder	C15
SA2270	Bladder	C14
SA2309	Bladder	C7
SA2330	Bladder	C15
SA2375	Bladder	C13
SA2396	Bladder	C15
SA2441	Bladder	C15
SA2469	Bladder	C6
SA2504	Bladder	C6
SA2537	Bladder	C7
SA2570	Bladder	C6
SA2603	Bladder	C6
SA2636	Bladder	C13
SA2663	Bladder	C15
SA2702	Bladder	C13
SA2729	Bladder	C15
SA2795	Bladder	C13
SA2840	Bladder	C13
SA2861	Bladder	C13
SA2918	Bladder	C13
SA2927	Bladder	C13
SA2990	Bladder	C7
SA2993	Bladder	C6
SA3053	Bladder	C6
SA3056	Bladder	C6
SA3128	Bladder	C6
SA3181	Bladder	C13
SA3184	Bladder	C14
SA3238	Bladder	C6
SA3247	Bladder	C13
SA3310	Bladder	C6
SA3325	Bladder	C13
SA3376	Bladder	C15
SA3391	Bladder	C12
SA3475	Bladder	C15
SA3478	Bladder	C16
SA3541	Bladder	C15
SA3607	Bladder	C15
SA3616	Bladder	C13
SA3721	Bladder	C7
SA3742	Bladder	C7
SA3805	Bladder	C15
SA3808	Bladder	C6
SA3874	Bladder	C14
SA3877	Bladder	C7
SA3940	Bladder	C13
SA3943	Bladder	C15
SA4012	Bladder	C6
SA4015	Bladder	C7
SA4072	Bladder	C15
SA4081	Bladder	C13
SA4138	Bladder	C16
SA4207	Bladder	C6
SA4210	Bladder	C13
SA4267	Bladder	C13
SA4270	Bladder	C15
SA4336	Bladder	C15
SA4351	Bladder	C6
SA4402	Bladder	C13
SA4417	Bladder	C7
SA4468	Bladder	C6
SA4489	Bladder	C15
SA4531	Bladder	C15
SA4557	Bladder	C13
SA4639	Bladder	C13
SA4666	Bladder	C13
SA4732	Bladder	C6
SA4747	Bladder	C7
SA4813	Bladder	C13
SA4852	Bladder	C15
SA4877	Bladder	C13
SA490776	Bladder	C13
SA491245	Bladder	C13
SA491257	Bladder	C15
SA4918	Bladder	C15
SA4951	Bladder	C15
SA4999	Bladder	C6
SA5026	Bladder	C15
SA5065	Bladder	C7
SA5093	Bladder	C15
SA5132	Bladder	C6
SA514685	Bladder	C15
SA514687	Bladder	C9
SA514689	Bladder	C9
SA514691	Bladder	C7
SA514692	Bladder	C9
SA514695	Bladder	C9
SA514696	Bladder	C16
SA514699	Bladder	C9
SA514700	Bladder	C16
SA514703	Bladder	C9
SA514704	Bladder	C15
SA514707	Bladder	C15
SA514708	Bladder	C7
SA514711	Bladder	C7
SA514712	Bladder	C15
SA514715	Bladder	C15
SA514716	Bladder	C15
SA514719	Bladder	C15
SA514720	Bladder	C9
SA514723	Bladder	C16
SA514724	Bladder	C7
SA514727	Bladder	C15
SA514728	Bladder	C6
SA514731	Bladder	C9
SA514732	Bladder	C12
SA514735	Bladder	C9
SA514736	Bladder	C12
SA514739	Bladder	C9
SA514740	Bladder	C16
SA514743	Bladder	C7
SA514744	Bladder	C7
SA514747	Bladder	C15
SA514748	Bladder	C7
SA514751	Bladder	C9
SA514752	Bladder	C16
SA514755	Bladder	C9
SA514756	Bladder	C7
SA514759	Bladder	C9
SA514760	Bladder	C16
SA514763	Bladder	C9
SA514764	Bladder	C16
SA514767	Bladder	C13
SA514768	Bladder	C12
SA514771	Bladder	C16
SA514772	Bladder	C13
SA514775	Bladder	C12
SA514776	Bladder	C12
SA514779	Bladder	C7
SA514780	Bladder	C15
SA514783	Bladder	C9
SA514784	Bladder	C15
SA514787	Bladder	C15
SA514788	Bladder	C13
SA514791	Bladder	C13
SA514792	Bladder	C16
SA514795	Bladder	C6
SA514796	Bladder	C7
SA514799	Bladder	C9
SA514800	Bladder	C13
SA514803	Bladder	C9
SA514804	Bladder	C7
SA514807	Bladder	C9
SA514808	Bladder	C16
SA514811	Bladder	C9
SA514812	Bladder	C13
SA514815	Bladder	C9
SA514816	Bladder	C15
SA514819	Bladder	C15
SA514820	Bladder	C7
SA514823	Bladder	C7
SA514824	Bladder	C6
SA514827	Bladder	C7
SA514828	Bladder	C9
SA514831	Bladder	C9
SA514832	Bladder	C7
SA514835	Bladder	C7
SA514836	Bladder	C6
SA514839	Bladder	C7
SA514840	Bladder	C7
SA514843	Bladder	C16
SA514844	Bladder	C8
SA514847	Bladder	C16
SA514848	Bladder	C15
SA514851	Bladder	C7
SA514852	Bladder	C15
SA514855	Bladder	C15
SA514856	Bladder	C15
SA514859	Bladder	C9
SA514860	Bladder	C16
SA514863	Bladder	C7
SA514864	Bladder	C16
SA514867	Bladder	C7
SA514868	Bladder	C7
SA514871	Bladder	C7
SA514872	Bladder	C12
SA514875	Bladder	C16
SA514876	Bladder	C7
SA514879	Bladder	C6
SA514880	Bladder	C7
SA514883	Bladder	C15
SA514885	Bladder	C9
SA514887	Bladder	C16
SA514889	Bladder	C13
SA5159	Bladder	C7
SA5195	Bladder	C13
SA521356	Bladder	C7
SA521388	Bladder	C15
SA5234	Bladder	C16
SA5255	Bladder	C7
SA5294	Bladder	C14
SA5318	Bladder	C6
SA5363	Bladder	C7
SA5378	Bladder	C15
SA5432	Bladder	C7
SA5451	Bladder	C13
SA5501	Bladder	C14
SA5516	Bladder	C6
SA5567	Bladder	C7
SA5582	Bladder	C7
SA5633	Bladder	C13
SA5648	Bladder	C13
SA5699	Bladder	C13
SA5714	Bladder	C15
SA5765	Bladder	C7
SA5780	Bladder	C15
SA5832	Bladder	C6
SA649	Bladder	C6
SA862	Bladder	C7
SA940	Bladder	C7
SA133	Blood	C7
SA30	Blood	C7
SA320818	Blood	C2
SA320824	Blood	C2
SA320830	Blood	C2
SA320836	Blood	C16
SA320842	Blood	C16
SA320848	Blood	C16
SA320854	Blood	C16
SA320860	Blood	C2
SA320866	Blood	C16
SA320872	Blood	C17
SA320878	Blood	C16
SA320884	Blood	C16
SA320890	Blood	C16
SA320896	Blood	C16
SA320902	Blood	C16
SA320908	Blood	C16
SA320914	Blood	C16
SA320920	Blood	C2
SA320926	Blood	C16
SA320932	Blood	C16
SA320938	Blood	C16
SA320944	Blood	C16
SA320950	Blood	C16
SA320956	Blood	C16
SA320962	Blood	C16
SA320968	Blood	C17
SA320974	Blood	C16
SA320980	Blood	C2
SA320986	Blood	C16
SA320992	Blood	C16
SA320998	Blood	C16
SA321004	Blood	C2
SA321012	Blood	C2
SA321014	Blood	C16
SA321021	Blood	C16
SA321023	Blood	C2
SA321030	Blood	C2
SA321032	Blood	C16
SA321039	Blood	C16
SA321041	Blood	C16
SA321048	Blood	C16
SA321050	Blood	C16
SA321057	Blood	C16
SA321066	Blood	C16
SA321103	Blood	C16
SA321106	Blood	C17
SA321111	Blood	C17
SA321119	Blood	C16
SA321128	Blood	C16
SA321137	Blood	C16
SA482	Blood	C7
SA506	Blood	C7
SA519680	Blood	C10
SA519720	Blood	C10
SA519735	Blood	C15
SA519736	Blood	C15
SA519744	Blood	C15
SA519749	Blood	C10
SA519763	Blood	C7
SA519780	Blood	C7
SA519785	Blood	C7
SA519812	Blood	C10
SA519858	Blood	C12
SA519859	Blood	C12
SA519868	Blood	C7
SA519869	Blood	C14
SA519895	Blood	C7
SA519896	Blood	C11
SA519899	Blood	C15
SA519900	Blood	C10
SA520420	Blood	C2
SA520422	Blood	C1
SA520425	Blood	C15
SA520426	Blood	C1
SA520427	Blood	C1
SA520430	Blood	C1
SA520431	Blood	C1
SA530301	Blood	C16
SA530304	Blood	C3
SA530306	Blood	C3
SA530307	Blood	C3
SA530309	Blood	C3
SA530311	Blood	C3
SA530313	Blood	C3
SA530315	Blood	C3
SA530317	Blood	C3
SA530320	Blood	C3
SA530323	Blood	C3
SA530324	Blood	C3
SA530325	Blood	C3
SA530327	Blood	C3
SA530329	Blood	C3
SA530331	Blood	C3
SA530334	Blood	C3
SA530335	Blood	C3
SA530337	Blood	C3
SA530339	Blood	C3
SA530341	Blood	C3
SA530343	Blood	C3
SA530344	Blood	C3
SA530346	Blood	C3
SA530348	Blood	C3
SA530351	Blood	C3
SA530353	Blood	C3
SA530355	Blood	C3
SA530357	Blood	C16
SA530359	Blood	C3
SA530361	Blood	C3
SA530363	Blood	C3
SA530365	Blood	C3
SA530367	Blood	C3
SA530369	Blood	C3
SA530371	Blood	C3
SA530373	Blood	C3
SA530375	Blood	C7
SA530377	Blood	C3
SA530378	Blood	C3
SA530381	Blood	C3
SA530383	Blood	C3
SA530385	Blood	C3
SA530387	Blood	C3
SA530389	Blood	C3
SA530392	Blood	C3
SA530393	Blood	C3
SA530395	Blood	C3
SA530398	Blood	C3
SA530399	Blood	C3
SA530402	Blood	C3
SA530403	Blood	C3
SA530405	Blood	C3
SA530407	Blood	C3
SA530409	Blood	C3
SA530412	Blood	C3
SA530413	Blood	C3
SA530415	Blood	C3
SA530416	Blood	C3
SA530417	Blood	C3
SA530418	Blood	C3
SA530419	Blood	C3
SA530420	Blood	C3
SA530421	Blood	C3
SA530422	Blood	C3
SA530423	Blood	C3
SA530424	Blood	C3
SA538975	Blood	C2
SA538977	Blood	C2
SA538980	Blood	C2
SA538983	Blood	C1
SA538985	Blood	C1
SA538992	Blood	C2
SA538995	Blood	C2
SA538998	Blood	C16
SA539000	Blood	C2
SA539002	Blood	C2
SA539004	Blood	C2
SA539006	Blood	C2
SA539008	Blood	C16
SA539010	Blood	C16
SA539012	Blood	C16
SA539014	Blood	C2
SA539017	Blood	C5
SA539019	Blood	C16
SA539021	Blood	C2
SA539023	Blood	C2
SA539025	Blood	C1
SA542018	Blood	C16
SA542021	Blood	C16
SA542024	Blood	C16
SA542027	Blood	C16
SA542030	Blood	C16
SA542034	Blood	C16
SA542040	Blood	C16
SA542043	Blood	C16
SA542046	Blood	C16
SA542049	Blood	C16
SA542053	Blood	C16
SA542054	Blood	C17
SA542058	Blood	C16
SA542062	Blood	C16
SA542063	Blood	C16
SA542064	Blood	C16
SA542069	Blood	C17
SA542072	Blood	C16
SA542075	Blood	C16
SA542078	Blood	C16
SA542082	Blood	C16
SA542084	Blood	C16
SA542087	Blood	C2
SA542090	Blood	C17
SA542093	Blood	C16
SA542096	Blood	C17
SA542099	Blood	C2
SA542101	Blood	C16
SA542105	Blood	C16
SA542108	Blood	C16
SA542111	Blood	C17
SA542114	Blood	C16
SA542117	Blood	C17
SA542120	Blood	C16
SA542123	Blood	C16
SA542126	Blood	C17
SA542129	Blood	C16
SA542132	Blood	C2
SA542134	Blood	C16
SA542137	Blood	C16
SA542140	Blood	C16
SA542143	Blood	C16
SA542146	Blood	C1
SA542149	Blood	C17
SA542152	Blood	C16
SA542155	Blood	C16
SA542158	Blood	C17
SA542160	Blood	C16
SA542163	Blood	C2
SA542165	Blood	C16
SA542167	Blood	C16
SA542169	Blood	C16
SA542171	Blood	C2
SA542173	Blood	C2
SA542175	Blood	C16
SA542177	Blood	C2
SA542179	Blood	C16
SA542181	Blood	C16
SA542183	Blood	C16
SA542185	Blood	C16
SA542187	Blood	C16
SA542189	Blood	C16
SA542191	Blood	C16
SA542193	Blood	C16
SA542195	Blood	C16
SA542197	Blood	C1
SA542199	Blood	C2
SA542201	Blood	C16
SA542203	Blood	C2
SA542205	Blood	C1
SA542207	Blood	C2
SA542209	Blood	C2
SA542211	Blood	C2
SA542213	Blood	C16
SA542215	Blood	C16
SA542217	Blood	C16
SA542220	Blood	C5
SA542221	Blood	C5
SA542222	Blood	C1
SA542224	Blood	C5
SA542225	Blood	C5
SA542226	Blood	C1
SA542228	Blood	C2
SA542229	Blood	C2
SA542232	Blood	C5
SA542233	Blood	C1
SA542235	Blood	C2
SA542236	Blood	C1
SA542241	Blood	C1
SA542242	Blood	C1
SA542244	Blood	C5
SA542245	Blood	C5
SA542246	Blood	C1
SA542248	Blood	C1
SA542249	Blood	C1
SA542251	Blood	C1
SA542252	Blood	C1
SA542254	Blood	C1
SA542255	Blood	C1
SA542257	Blood	C8
SA542258	Blood	C7
SA542260	Blood	C7
SA542261	Blood	C1
SA542263	Blood	C1
SA542265	Blood	C1
SA542267	Blood	C5
SA542268	Blood	C1
SA542270	Blood	C5
SA542271	Blood	C1
SA542273	Blood	C5
SA542274	Blood	C5
SA542276	Blood	C1
SA542277	Blood	C1
SA542279	Blood	C7
SA542280	Blood	C7
SA542282	Blood	C1
SA542283	Blood	C1
SA542285	Blood	C1
SA542286	Blood	C1
SA542289	Blood	C7
SA542290	Blood	C5
SA542292	Blood	C1
SA542293	Blood	C5
SA542295	Blood	C1
SA542296	Blood	C7
SA542298	Blood	C1
SA542300	Blood	C5
SA542301	Blood	C7
SA542302	Blood	C5
SA542304	Blood	C5
SA542305	Blood	C7
SA542307	Blood	C7
SA542308	Blood	C1
SA542311	Blood	C5
SA542312	Blood	C1
SA542314	Blood	C1
SA542318	Blood	C1
SA542320	Blood	C1
SA542332	Blood	C16
SA542382	Blood	C2
SA542383	Blood	C2
SA542384	Blood	C1
SA542385	Blood	C1
SA542386	Blood	C2
SA542387	Blood	C2
SA542388	Blood	C2
SA542389	Blood	C2
SA542390	Blood	C2
SA542391	Blood	C2
SA542392	Blood	C2
SA542393	Blood	C2
SA542394	Blood	C2
SA542395	Blood	C2
SA542396	Blood	C2
SA542397	Blood	C2
SA557653	Blood	C16
SA557656	Blood	C16
SA557659	Blood	C2
SA557662	Blood	C16
SA557665	Blood	C17
SA557668	Blood	C16
SA557671	Blood	C16
SA557677	Blood	C16
SA557680	Blood	C16
SA557683	Blood	C16
SA557686	Blood	C16
SA557689	Blood	C16
SA557692	Blood	C2
SA557694	Blood	C16
SA557797	Blood	C7
SA557808	Blood	C7
SA557813	Blood	C7
SA557820	Blood	C7
SA557847	Blood	C7
SA557895	Blood	C7
SA557908	Blood	C7
SA557918	Blood	C7
SA557923	Blood	C10
SA557937	Blood	C12
SA557941	Blood	C7
SA557942	Blood	C11
SA558143	Blood	C7
SA558167	Blood	C7
SA558176	Blood	C7
SA558182	Blood	C7
SA558188	Blood	C11
SA558200	Blood	C7
SA558247	Blood	C7
SA558267	Blood	C7
SA558278	Blood	C7
SA558354	Blood	C11
SA558368	Blood	C10
SA558407	Blood	C7
SA558453	Blood	C7
SA558456	Blood	C7
SA558461	Blood	C7
SA558463	Blood	C7
SA558468	Blood	C7
SA558470	Blood	C7
SA558477	Blood	C7
SA558487	Blood	C7
SA558489	Blood	C7
SA558504	Blood	C10
SA558507	Blood	C7
SA558513	Blood	C12
SA558515	Blood	C7
SA558516	Blood	C11
SA558517	Blood	C7
SA558522	Blood	C7
SA558536	Blood	C7
SA558541	Blood	C12
SA558645	Blood	C16
SA560593	Blood	C7
SA560599	Blood	C7
SA560602	Blood	C15
SA560605	Blood	C15
SA560609	Blood	C15
SA560612	Blood	C12
SA560617	Blood	C7
SA564139	Blood	C2
SA564140	Blood	C16
SA564141	Blood	C2
SA564142	Blood	C1
SA564143	Blood	C1
SA564144	Blood	C5
SA564145	Blood	C2
SA564146	Blood	C1
SA564147	Blood	C2
SA564148	Blood	C1
SA564561	Blood	C1
SA564562	Blood	C2
SA564563	Blood	C16
SA564564	Blood	C1
SA564565	Blood	C16
SA564566	Blood	C2
SA564680	Blood	C2
SA564755	Blood	C2
SA564770	Blood	C16
SA564771	Blood	C1
SA564772	Blood	C2
SA564773	Blood	C1
SA564774	Blood	C16
SA564775	Blood	C16
SA564776	Blood	C16
SA564777	Blood	C1
SA564778	Blood	C16
SA564779	Blood	C2
SA564781	Blood	C1
SA564783	Blood	C2
SA564785	Blood	C1
SA564787	Blood	C1
SA564789	Blood	C1
SA564791	Blood	C2
SA564793	Blood	C1
SA564795	Blood	C2
SA564797	Blood	C16
SA564799	Blood	C2
SA564801	Blood	C2
SA564803	Blood	C16
SA564805	Blood	C1
SA564807	Blood	C2
SA564808	Blood	C2
SA564809	Blood	C16
SA564811	Blood	C13
SA564812	Blood	C16
SA564813	Blood	C16
SA564814	Blood	C2
SA564815	Blood	C16
SA564817	Blood	C7
SA564818	Blood	C16
SA565	Blood	C7
SA566340	Blood	C7
SA566341	Blood	C7
SA566343	Blood	C7
SA566344	Blood	C7
SA566347	Blood	C11
SA566349	Blood	C7
SA566350	Blood	C7
SA566352	Blood	C7
SA566354	Blood	C7
SA566355	Blood	C7
SA566357	Blood	C10
SA566359	Blood	C7
SA566360	Blood	C7
SA566362	Blood	C11
SA566363	Blood	C11
SA566365	Blood	C7
SA566367	Blood	C7
SA566369	Blood	C7
SA566371	Blood	C10
SA566372	Blood	C7
SA566375	Blood	C11
SA566376	Blood	C7
SA566378	Blood	C7
SA566380	Blood	C11
SA566381	Blood	C7
SA566383	Blood	C7
SA566384	Blood	C10
SA566386	Blood	C7
SA566388	Blood	C7
SA566389	Blood	C7
SA566391	Blood	C7
SA566393	Blood	C7
SA566395	Blood	C7
SA566397	Blood	C7
SA566399	Blood	C10
SA566401	Blood	C10
SA566402	Blood	C7
SA566403	Blood	C10
SA566405	Blood	C7
SA566406	Blood	C7
SA566408	Blood	C10
SA566410	Blood	C7
SA566412	Blood	C7
SA566414	Blood	C7
SA566417	Blood	C7
SA566418	Blood	C7
SA566420	Blood	C7
SA566422	Blood	C7
SA566424	Blood	C7
SA566426	Blood	C7
SA566429	Blood	C7
SA566430	Blood	C7
SA566431	Blood	C7
SA566432	Blood	C7
SA566433	Blood	C7
SA566434	Blood	C10
SA566435	Blood	C7
SA566436	Blood	C7
SA566437	Blood	C7
SA566438	Blood	C7
SA566439	Blood	C7
SA566440	Blood	C7
SA566441	Blood	C7
SA566442	Blood	C10
SA566443	Blood	C7
SA566444	Blood	C10
SA566445	Blood	C7
SA566446	Blood	C10
SA566447	Blood	C7
SA566448	Blood	C7
SA566449	Blood	C7
SA566450	Blood	C7
SA566451	Blood	C7
SA566452	Blood	C7
SA566453	Blood	C7
SA566454	Blood	C7
SA566455	Blood	C10
SA566456	Blood	C7
SA566457	Blood	C7
SA566458	Blood	C7
SA566459	Blood	C7
SA566460	Blood	C10
SA566461	Blood	C7
SA566462	Blood	C11
SA566463	Blood	C7
SA566464	Blood	C10
SA566465	Blood	C7
SA566466	Blood	C10
SA566467	Blood	C7
SA566468	Blood	C10
SA566469	Blood	C7
SA566470	Blood	C7
SA566471	Blood	C7
SA566472	Blood	C7
SA566473	Blood	C7
SA566475	Blood	C7
SA566476	Blood	C7
SA566477	Blood	C7
SA566478	Blood	C11
SA566479	Blood	C7
SA566480	Blood	C7
SA566481	Blood	C7
SA566482	Blood	C7
SA566483	Blood	C10
SA566484	Blood	C7
SA566485	Blood	C7
SA566487	Blood	C7
SA566488	Blood	C10
SA566489	Blood	C7
SA566490	Blood	C7
SA566491	Blood	C7
SA566492	Blood	C7
SA566493	Blood	C7
SA566494	Blood	C10
SA566495	Blood	C7
SA566496	Blood	C7
SA566497	Blood	C7
SA566498	Blood	C7
SA566499	Blood	C7
SA566500	Blood	C7
SA566501	Blood	C7
SA566502	Blood	C7
SA566503	Blood	C7
SA566504	Blood	C7
SA566505	Blood	C10
SA566506	Blood	C7
SA566507	Blood	C10
SA566508	Blood	C7
SA566509	Blood	C7
SA566510	Blood	C7
SA566511	Blood	C11
SA566512	Blood	C7
SA566513	Blood	C7
SA566514	Blood	C7
SA566515	Blood	C7
SA566516	Blood	C7
SA566517	Blood	C7
SA566518	Blood	C7
SA566519	Blood	C7
SA566520	Blood	C10
SA566521	Blood	C7
SA566523	Blood	C7
SA566524	Blood	C7
SA566525	Blood	C7
SA566526	Blood	C7
SA566527	Blood	C7
SA566528	Blood	C7
SA566529	Blood	C7
SA566530	Blood	C7
SA566531	Blood	C7
SA566532	Blood	C7
SA566533	Blood	C12
SA566534	Blood	C7
SA566535	Blood	C7
SA566536	Blood	C10
SA566537	Blood	C7
SA566539	Blood	C7
SA566540	Blood	C7
SA569165	Blood	C7
SA569167	Blood	C7
SA569169	Blood	C7
SA569172	Blood	C7
SA569173	Blood	C7
SA569175	Blood	C7
SA569177	Blood	C7
SA569180	Blood	C7
SA569181	Blood	C7
SA569184	Blood	C7
SA569189	Blood	C7
SA569192	Blood	C7
SA569195	Blood	C7
SA569198	Blood	C7
SA569203	Blood	C7
SA569207	Blood	C7
SA569212	Blood	C7
SA569216	Blood	C7
SA569219	Blood	C7
SA569220	Blood	C7
SA569224	Blood	C15
SA569226	Blood	C7
SA569228	Blood	C10
SA569231	Blood	C7
SA569232	Blood	C7
SA569237	Blood	C7
SA569239	Blood	C7
SA569241	Blood	C7
SA569245	Blood	C7
SA569248	Blood	C7
SA569251	Blood	C7
SA569254	Blood	C7
SA569258	Blood	C7
SA569261	Blood	C7
SA569262	Blood	C7
SA569265	Blood	C7
SA569268	Blood	C7
SA569271	Blood	C7
SA569281	Blood	C15
SA569286	Blood	C7
SA569291	Blood	C7
SA569294	Blood	C7
SA569301	Blood	C7
SA569308	Blood	C7
SA569310	Blood	C7
SA569312	Blood	C7
SA569318	Blood	C7
SA569323	Blood	C7
SA569327	Blood	C7
SA569330	Blood	C7
SA569336	Blood	C7
SA569340	Blood	C7
SA569347	Blood	C7
SA569356	Blood	C7
SA569363	Blood	C7
SA569365	Blood	C7
SA569368	Blood	C7
SA569378	Blood	C7
SA569388	Blood	C7
SA569398	Blood	C7
SA569401	Blood	C7
SA569404	Blood	C7
SA569412	Blood	C7
SA570971	Blood	C7
SA570972	Blood	C7
SA570973	Blood	C7
SA570974	Blood	C7
SA570975	Blood	C7
SA570976	Blood	C17
SA570977	Blood	C7
SA570978	Blood	C9
SA570979	Blood	C7
SA570980	Blood	C7
SA570981	Blood	C7
SA570982	Blood	C7
SA570983	Blood	C7
SA570984	Blood	C7
SA570985	Blood	C15
SA570986	Blood	C7
SA570987	Blood	C7
SA570988	Blood	C7
SA570989	Blood	C7
SA570990	Blood	C7
SA570991	Blood	C7
SA570992	Blood	C15
SA570993	Blood	C10
SA570994	Blood	C13
SA570995	Blood	C7
SA570996	Blood	C7
SA570997	Blood	C7
SA570998	Blood	C7
SA570999	Blood	C7
SA571000	Blood	C7
SA571001	Blood	C7
SA571002	Blood	C7
SA571003	Blood	C7
SA571004	Blood	C7
SA571005	Blood	C7
SA571006	Blood	C7
SA571007	Blood	C15
SA571008	Blood	C10
SA571009	Blood	C11
SA571010	Blood	C11
SA594258	Blood	C16
SA594262	Blood	C16
SA594267	Blood	C16
SA594273	Blood	C16
SA594289	Blood	C16
SA594304	Blood	C16
SA594316	Blood	C16
SA594321	Blood	C16
SA594325	Blood	C16
SA594336	Blood	C16
SA595655	Blood	C17
SA595657	Blood	C17
SA595954	Blood	C17
SA595960	Blood	C17
SA595963	Blood	C17
SA595990	Blood	C17
SA596	Blood	C7
SA596274	Blood	C16
SA596292	Blood	C16
SA596304	Blood	C2
SA596330	Blood	C16
SA596340	Blood	C16
SA596345	Blood	C16
SA596353	Blood	C16
SA596357	Blood	C16
SA596365	Blood	C2
SA596367	Blood	C16
SA596372	Blood	C17
SA596384	Blood	C16
SA596385	Blood	C16
SA596433	Blood	C16
SA596437	Blood	C16
SA596439	Blood	C16
SA596452	Blood	C16
SA596459	Blood	C16
SA596461	Blood	C17
SA596476	Blood	C16
SA596486	Blood	C16
SA596491	Blood	C16
SA596495	Blood	C16
SA596499	Blood	C16
SA596504	Blood	C16
SA596507	Blood	C16
SA596516	Blood	C16
SA596517	Blood	C16
SA596524	Blood	C17
SA596533	Blood	C16
SA596535	Blood	C17
SA596538	Blood	C16
SA596543	Blood	C2
SA596549	Blood	C16
SA596557	Blood	C1
SA596561	Blood	C16
SA596567	Blood	C2
SA596572	Blood	C16
SA596574	Blood	C16
SA596575	Blood	C16
SA596583	Blood	C16
SA596585	Blood	C16
SA596587	Blood	C16
SA596594	Blood	C16
SA596595	Blood	C16
SA596601	Blood	C16
SA596605	Blood	C16
SA596612	Blood	C17
SA596620	Blood	C2
SA596632	Blood	C16
SA596642	Blood	C16
SA596651	Blood	C16
SA596662	Blood	C1
SA596663	Blood	C2
SA596674	Blood	C16
SA596706	Blood	C2
SA596715	Blood	C16
SA596730	Blood	C16
SA596741	Blood	C16
SA596761	Blood	C16
SA596771	Blood	C16
SA596780	Blood	C16
SA596786	Blood	C17
SA596799	Blood	C16
SA596828	Blood	C16
SA596836	Blood	C16
SA596840	Blood	C16
SA596852	Blood	C2
SA596858	Blood	C16
SA596860	Blood	C16
SA596867	Blood	C16
SA596885	Blood	C16
SA596894	Blood	C16
SA596920	Blood	C1
SA596924	Blood	C16
SA596948	Blood	C16
SA596967	Blood	C16
SA596981	Blood	C16
SA597002	Blood	C16
SA597016	Blood	C2
SA597051	Blood	C16
SA597053	Blood	C16
SA597082	Blood	C16
SA597095	Blood	C16
SA597118	Blood	C16
SA597133	Blood	C16
SA597149	Blood	C2
SA597159	Blood	C16
SA597169	Blood	C16
SA597178	Blood	C1
SA597184	Blood	C16
SA597198	Blood	C17
SA597207	Blood	C16
SA597225	Blood	C17
SA597230	Blood	C16
SA597238	Blood	C16
SA597259	Blood	C16
SA597291	Blood	C16
SA597306	Blood	C16
SA597319	Blood	C16
SA597336	Blood	C16
SA597369	Blood	C2
SA597386	Blood	C2
SA597521	Blood	C16
SA597531	Blood	C1
SA597536	Blood	C16
SA597540	Blood	C1
SA597547	Blood	C16
SA597555	Blood	C16
SA597566	Blood	C16
SA597573	Blood	C16
SA597577	Blood	C17
SA597583	Blood	C1
SA597598	Blood	C16
SA597612	Blood	C1
SA597616	Blood	C16
SA597627	Blood	C16
SA597634	Blood	C16
SA597644	Blood	C16
SA597648	Blood	C17
SA597653	Blood	C16
SA597658	Blood	C16
SA597666	Blood	C16
SA597930	Blood	C16
SA597936	Blood	C16
SA597939	Blood	C16
SA597942	Blood	C16
SA597944	Blood	C16
SA597949	Blood	C16
SA597950	Blood	C16
SA597956	Blood	C16
SA597957	Blood	C16
SA597961	Blood	C17
SA597962	Blood	C1
SA597966	Blood	C16
SA597968	Blood	C16
SA597973	Blood	C16
SA597976	Blood	C16
SA597977	Blood	C16
SA597983	Blood	C16
SA597986	Blood	C16
SA597987	Blood	C16
SA597990	Blood	C16
SA597991	Blood	C2
SA597993	Blood	C17
SA597995	Blood	C16
SA629	Blood	C7
SA85109	Blood	C7
SA85124	Blood	C7
SA85134	Blood	C7
SA85146	Blood	C7
SA85158	Blood	C6
SA85172	Blood	C7
SA85178	Blood	C7
SA85197	Blood	C7
SA85209	Blood	C1
SA85221	Blood	C7
SA85233	Blood	C7
SA85244	Blood	C16
SA85256	Blood	C7
SA85269	Blood	C1
SA85280	Blood	C7
SA85292	Blood	C7
SA85298	Blood	C2
SA85310	Blood	C7
SA85328	Blood	C11
SA85340	Blood	C16
SA85347	Blood	C7
SA85358	Blood	C7
SA85376	Blood	C7
SA85388	Blood	C7
SA85400	Blood	C7
SA85412	Blood	C7
SA85424	Blood	C7
SA85436	Blood	C7
SA85448	Blood	C7
SA85460	Blood	C7
SA85472	Blood	C7
SA85484	Blood	C7
SA85496	Blood	C7
SA85506	Blood	C2
SA85517	Blood	C8
SA85530	Blood	C7
SA85535	Blood	C2
SA85553	Blood	C16
SA85559	Blood	C7
SA85574	Blood	C7
SA85583	Blood	C7
SA85595	Blood	C7
SA85607	Blood	C7
SA85619	Blood	C7
SA85628	Blood	C7
SA85638	Blood	C7
SA85656	Blood	C7
SA85671	Blood	C2
SA85680	Blood	C7
SA85692	Blood	C7
SA85704	Blood	C7
SA85710	Blood	C1
SA85722	Blood	C16
SA86089	Blood	C7
SA86102	Blood	C1
SA86108	Blood	C2
SA86114	Blood	C1
SA86119	Blood	C2
SA86126	Blood	C2
SA86131	Blood	C2
SA86170	Blood	C2
SA86182	Blood	C2
SA86191	Blood	C7
SA86203	Blood	C7
SA86215	Blood	C1
SA86227	Blood	C7
SA86239	Blood	C16
SA86251	Blood	C7
SA86263	Blood	C2
SA86276	Blood	C2
SA86290	Blood	C7
SA86302	Blood	C2
SA86314	Blood	C1
SA86326	Blood	C2
SA86338	Blood	C2
SA86347	Blood	C2
SA86359	Blood	C16
SA86377	Blood	C7
SA86383	Blood	C16
SA86399	Blood	C7
SA86413	Blood	C7
SA86425	Blood	C7
SA86437	Blood	C7
SA86450	Blood	C1
SA86462	Blood	C7
SA86476	Blood	C2
SA86482	Blood	C7
SA86498	Blood	C7
SA86506	Blood	C7
SA86518	Blood	C7
SA86533	Blood	C7
SA86545	Blood	C1
SA86551	Blood	C16
SA86569	Blood	C1
SA86575	Blood	C1
SA86594	Blood	C16
SA86606	Blood	C13
SA86617	Blood	C7
SA86629	Blood	C7
SA86636	Blood	C7
SA86650	Blood	C7
SA86668	Blood	C7
SA86680	Blood	C16
SA86686	Blood	C7
SA86696	Blood	C2
SA86716	Blood	C7
SA86726	Blood	C1
SA86738	Blood	C7
SA86743	Blood	C2
SA86755	Blood	C7
SA86768	Blood	C2
SA86947	Blood	C7
SA86949	Blood	C7
SA86950	Blood	C7
SA86951	Blood	C7
SA86952	Blood	C7
SA86953	Blood	C7
SA86954	Blood	C7
SA86955	Blood	C7
SA86956	Blood	C7
SA86958	Blood	C7
SA86960	Blood	C7
SA86961	Blood	C7
SA86962	Blood	C7
SA86963	Blood	C7
SA86965	Blood	C7
SA86966	Blood	C7
SA86968	Blood	C7
SA86970	Blood	C7
SA86971	Blood	C7
SA86972	Blood	C7
SA86974	Blood	C7
SA86976	Blood	C7
SA86977	Blood	C7
SA86978	Blood	C7
SA86979	Blood	C7
SA86980	Blood	C7
SA86981	Blood	C15
SA86982	Blood	C7
SA86984	Blood	C7
SA86985	Blood	C7
SA86987	Blood	C7
SA86989	Blood	C7
SA86991	Blood	C7
SA86994	Blood	C7
SA86996	Blood	C7
SA87000	Blood	C7
SA87001	Blood	C7
SA87002	Blood	C7
SA87003	Blood	C7
SA87004	Blood	C7
SA87005	Blood	C7
SA87006	Blood	C7
SA87007	Blood	C7
SA87008	Blood	C7
SA87009	Blood	C7
SA87010	Blood	C7
SA87011	Blood	C7
SA87012	Blood	C7
SA87013	Blood	C7
SA87014	Blood	C7
SA87015	Blood	C7
SA87016	Blood	C7
SA87017	Blood	C7
SA87018	Blood	C7
SA87019	Blood	C7
SA87020	Blood	C7
SA87021	Blood	C7
SA87022	Blood	C7
SA87023	Blood	C7
SA87024	Blood	C7
SA87025	Blood	C7
SA87026	Blood	C7
SA87027	Blood	C7
SA87029	Blood	C7
SA87031	Blood	C7
SA87032	Blood	C7
SA87033	Blood	C7
SA87034	Blood	C7
SA87036	Blood	C7
SA87038	Blood	C7
SA87039	Blood	C7
SA87040	Blood	C7
SA87041	Blood	C7
SA87042	Blood	C7
SA87043	Blood	C7
SA87044	Blood	C7
SA87045	Blood	C7
SA87046	Blood	C7
SA87047	Blood	C7
SA87048	Blood	C7
SA87049	Blood	C7
SA87050	Blood	C7
SA87051	Blood	C7
SA87052	Blood	C7
SA87054	Blood	C7
SA87055	Blood	C7
SA87056	Blood	C7
SA87058	Blood	C7
SA87059	Blood	C7
SA87060	Blood	C7
SA87061	Blood	C7
SA87062	Blood	C7
SA87063	Blood	C7
SA87064	Blood	C7
SA87065	Blood	C7
SA87066	Blood	C7
SA87067	Blood	C7
SA87068	Blood	C7
SA87069	Blood	C7
SA87070	Blood	C7
SA87071	Blood	C7
SA87072	Blood	C7
SA87073	Blood	C7
SA87074	Blood	C7
SA87075	Blood	C7
SA541868	Bone	C16
SA541870	Bone	C16
SA541872	Bone	C16
SA541874	Bone	C16
SA541876	Bone	C16
SA541878	Bone	C1
SA541880	Bone	C16
SA541882	Bone	C16
SA541884	Bone	C16
SA541886	Bone	C16
SA541888	Bone	C16
SA541890	Bone	C1
SA541892	Bone	C1
SA541894	Bone	C16
SA541896	Bone	C16
SA541898	Bone	C16
SA541900	Bone	C16
SA541902	Bone	C16
SA541904	Bone	C16
SA541906	Bone	C2
SA541910	Bone	C16
SA541912	Bone	C2
SA541914	Bone	C16
SA541916	Bone	C5
SA541918	Bone	C1
SA541920	Bone	C2
SA541922	Bone	C1
SA541924	Bone	C16
SA541926	Bone	C2
SA541928	Bone	C2
SA541930	Bone	C2
SA541932	Bone	C16
SA541934	Bone	C16
SA541936	Bone	C16
SA541938	Bone	C16
SA541940	Bone	C1
SA541942	Bone	C1
SA541944	Bone	C16
SA541946	Bone	C16
SA541948	Bone	C2
SA541952	Bone	C1
SA541954	Bone	C7
SA541960	Bone	C1
SA541964	Bone	C2
SA541966	Bone	C1
SA541972	Bone	C5
SA541976	Bone	C1
SA541978	Bone	C5
SA541980	Bone	C7
SA541982	Bone	C7
SA541984	Bone	C16
SA541986	Bone	C1
SA541990	Bone	C1
SA541992	Bone	C15
SA541994	Bone	C5
SA541996	Bone	C5
SA541998	Bone	C1
SA542000	Bone	C7
SA542002	Bone	C5
SA542004	Bone	C5
SA542006	Bone	C1
SA542008	Bone	C1
SA542010	Bone	C5
SA542014	Bone	C1
SA5918	Bone	C15
SA5921	Bone	C12
SA5924	Bone	C7
SA5927	Bone	C7
SA5930	Bone	C7
SA5933	Bone	C7
SA5936	Bone	C7
SA5939	Bone	C7
SA5940	Bone	C7
SA5943	Bone	C7
SA5946	Bone	C7
SA5949	Bone	C7
SA5952	Bone	C7
SA5955	Bone	C7
SA5958	Bone	C7
SA5961	Bone	C7
SA5964	Bone	C7
SA5967	Bone	C7
SA5970	Bone	C7
SA5973	Bone	C7
SA5976	Bone	C12
SA5979	Bone	C7
SA5982	Bone	C7
SA5985	Bone	C7
SA598545	Bone	C7
SA598547	Bone	C7
SA598549	Bone	C7
SA598551	Bone	C1
SA598553	Bone	C5
SA598555	Bone	C7
SA598557	Bone	C13
SA598559	Bone	C5
SA598561	Bone	C5
SA598563	Bone	C5
SA598565	Bone	C1
SA598567	Bone	C5
SA598569	Bone	C7
SA598571	Bone	C7
SA598573	Bone	C15
SA598575	Bone	C7
SA598577	Bone	C1
SA598579	Bone	C7
SA598581	Bone	C13
SA598583	Bone	C5
SA598585	Bone	C15
SA598587	Bone	C5
SA598589	Bone	C1
SA598591	Bone	C1
SA598593	Bone	C5
SA598595	Bone	C5
SA598597	Bone	C5
SA598599	Bone	C7
SA598601	Bone	C5
SA598603	Bone	C1
SA598605	Bone	C5
SA598607	Bone	C5
SA598609	Bone	C1
SA598611	Bone	C5
SA598613	Bone	C7
SA598615	Bone	C5
SA598617	Bone	C5
SA598619	Bone	C7
SA598621	Bone	C16
SA598623	Bone	C5
SA598625	Bone	C7
SA598627	Bone	C5
SA598629	Bone	C5
SA598631	Bone	C5
SA598633	Bone	C7
SA598635	Bone	C6
SA598637	Bone	C7
SA598639	Bone	C15
SA598641	Bone	C7
SA598643	Bone	C5
SA598645	Bone	C5
SA598649	Bone	C5
SA598651	Bone	C5
SA598653	Bone	C5
SA598657	Bone	C1
SA598659	Bone	C5
SA598661	Bone	C5
SA598663	Bone	C1
SA598665	Bone	C5
SA598667	Bone	C5
SA598669	Bone	C15
SA598671	Bone	C5
SA598673	Bone	C5
SA598675	Bone	C5
SA598677	Bone	C5
SA598679	Bone	C1
SA598681	Bone	C1
SA598683	Bone	C5
SA598685	Bone	C5
SA598687	Bone	C5
SA598689	Bone	C5
SA598691	Bone	C7
SA598693	Bone	C13
SA598695	Bone	C1
SA598697	Bone	C1
SA598699	Bone	C7
SA598701	Bone	C5
SA598703	Bone	C5
SA598705	Bone	C5
SA598707	Bone	C7
SA598709	Bone	C7
SA598711	Bone	C7
SA598713	Bone	C7
SA598715	Bone	C7
SA598717	Bone	C7
SA598719	Bone	C7
SA598721	Bone	C7
SA598723	Bone	C7
SA598725	Bone	C7
SA598727	Bone	C7
SA598729	Bone	C5
SA598731	Bone	C5
SA598733	Bone	C7
SA598735	Bone	C5
SA598737	Bone	C7
SA598739	Bone	C5
SA598741	Bone	C7
SA598743	Bone	C12
SA5988	Bone	C7
SA5991	Bone	C12
SA5994	Bone	C12
SA5997	Bone	C7
SA6000	Bone	C7
SA6003	Bone	C12
SA6006	Bone	C7
SA6009	Bone	C7
SA6012	Bone	C7
SA6015	Bone	C7
SA6018	Bone	C7
SA6020	Bone	C7
SA6024	Bone	C7
SA6027	Bone	C12
SA6030	Bone	C12
SA6033	Bone	C7
SA6036	Bone	C7
SA6039	Bone	C7
SA6042	Bone	C7
SA6045	Bone	C7
SA6048	Bone	C7
SA6051	Bone	C7
SA6054	Bone	C7
SA6057	Bone	C7
SA6060	Bone	C7
SA6063	Bone	C7
SA6066	Bone	C7
SA6069	Bone	C7
SA6072	Bone	C12
SA6078	Bone	C7
SA6081	Bone	C7
SA6084	Bone	C7
SA6087	Bone	C12
SA6094	Bone	C7
SA6097	Bone	C7
SA6100	Bone	C7
SA6106	Bone	C12
SA6109	Bone	C7
SA6112	Bone	C7
SA6115	Bone	C7
SA6118	Bone	C7
SA131030	Brain	C7
SA131174	Brain	C6
SA131231	Brain	C13
SA131432	Brain	C7
SA131728	Brain	C6
SA131884	Brain	C12
SA132016	Brain	C7
SA132276	Brain	C7
SA132368	Brain	C7
SA132690	Brain	C13
SA133178	Brain	C12
SA133366	Brain	C13
SA133398	Brain	C6
SA133674	Brain	C10
SA134058	Brain	C12
SA134450	Brain	C7
SA134578	Brain	C7
SA134606	Brain	C7
SA134792	Brain	C13
SA134853	Brain	C8
SA135168	Brain	C12
SA135256	Brain	C12
SA135301	Brain	C7
SA135345	Brain	C7
SA135381	Brain	C12
SA135813	Brain	C13
SA135915	Brain	C7
SA136091	Brain	C7
SA136272	Brain	C7
SA136316	Brain	C7
SA136708	Brain	C7
SA136883	Brain	C7
SA137367	Brain	C7
SA137476	Brain	C15
SA137769	Brain	C6
SA137848	Brain	C11
SA137860	Brain	C13
SA138061	Brain	C7
SA138170	Brain	C7
SA138250	Brain	C7
SA138468	Brain	C15
SA138662	Brain	C7
SA138738	Brain	C12
SA139210	Brain	C7
SA139291	Brain	C8
SA139381	Brain	C7
SA139488	Brain	C7
SA139656	Brain	C12
SA139948	Brain	C15
SA140123	Brain	C7
SA140235	Brain	C7
SA140392	Brain	C6
SA140567	Brain	C6
SA140772	Brain	C12
SA140938	Brain	C7
SA141147	Brain	C7
SA141272	Brain	C12
SA141462	Brain	C12
SA141549	Brain	C12
SA142043	Brain	C6
SA142242	Brain	C15
SA142323	Brain	C15
SA142387	Brain	C7
SA142549	Brain	C7
SA142574	Brain	C15
SA143105	Brain	C7
SA143344	Brain	C7
SA143359	Brain	C12
SA143667	Brain	C13
SA143712	Brain	C12
SA143892	Brain	C12
SA144017	Brain	C7
SA144576	Brain	C12
SA144615	Brain	C15
SA144660	Brain	C7
SA145283	Brain	C7
SA145430	Brain	C6
SA145515	Brain	C8
SA145721	Brain	C7
SA145820	Brain	C7
SA146080	Brain	C15
SA146105	Brain	C7
SA146175	Brain	C12
SA146399	Brain	C13
SA146608	Brain	C13
SA146843	Brain	C15
SA146997	Brain	C7
SA147027	Brain	C13
SA147241	Brain	C12
SA147256	Brain	C7
SA148380	Brain	C13
SA148683	Brain	C7
SA148718	Brain	C7
SA149303	Brain	C7
SA149488	Brain	C12
SA149584	Brain	C13
SA149733	Brain	C7
SA149883	Brain	C7
SA149898	Brain	C7
SA150033	Brain	C15
SA150476	Brain	C15
SA150611	Brain	C12
SA150776	Brain	C12
SA150781	Brain	C7
SA151101	Brain	C12
SA151190	Brain	C13
SA151405	Brain	C7
SA151709	Brain	C11
SA151800	Brain	C7
SA151966	Brain	C7
SA152581	Brain	C7
SA152676	Brain	C7
SA152761	Brain	C12
SA152951	Brain	C7
SA153016	Brain	C12
SA153303	Brain	C12
SA153578	Brain	C13
SA153603	Brain	C7
SA153817	Brain	C12
SA154032	Brain	C13
SA154118	Brain	C7
SA154417	Brain	C7
SA154497	Brain	C7
SA155032	Brain	C7
SA155122	Brain	C12
SA155250	Brain	C7
SA155306	Brain	C7
SA155940	Brain	C12
SA156205	Brain	C12
SA156336	Brain	C7
SA156800	Brain	C12
SA156805	Brain	C13
SA156900	Brain	C7
SA157075	Brain	C12
SA157100	Brain	C15
SA157629	Brain	C7
SA158256	Brain	C7
SA158391	Brain	C12
SA158630	Brain	C7
SA158835	Brain	C7
SA159295	Brain	C15
SA159460	Brain	C6
SA159565	Brain	C15
SA160020	Brain	C7
SA160130	Brain	C15
SA160311	Brain	C7
SA160421	Brain	C7
SA160526	Brain	C6
SA160801	Brain	C15
SA161141	Brain	C13
SA161196	Brain	C10
SA161502	Brain	C6
SA161546	Brain	C6
SA161746	Brain	C12
SA161916	Brain	C13
SA161991	Brain	C7
SA162196	Brain	C7
SA162221	Brain	C7
SA162311	Brain	C7
SA162801	Brain	C15
SA163036	Brain	C7
SA163291	Brain	C7
SA163397	Brain	C12
SA163620	Brain	C7
SA163831	Brain	C13
SA164034	Brain	C7
SA164134	Brain	C13
SA164299	Brain	C15
SA164409	Brain	C7
SA164579	Brain	C13
SA164854	Brain	C7
SA164869	Brain	C15
SA165304	Brain	C13
SA165514	Brain	C7
SA165624	Brain	C12
SA165744	Brain	C7
SA165834	Brain	C7
SA165939	Brain	C7
SA165969	Brain	C12
SA166109	Brain	C12
SA166574	Brain	C7
SA166699	Brain	C15
SA166804	Brain	C12
SA166919	Brain	C7
SA166994	Brain	C7
SA167189	Brain	C7
SA167229	Brain	C7
SA167349	Brain	C16
SA167759	Brain	C15
SA167833	Brain	C15
SA167918	Brain	C12
SA168048	Brain	C7
SA168418	Brain	C7
SA168468	Brain	C7
SA168628	Brain	C7
SA168683	Brain	C12
SA168758	Brain	C7
SA169078	Brain	C7
SA169208	Brain	C6
SA169233	Brain	C7
SA169404	Brain	C7
SA169988	Brain	C7
SA170193	Brain	C7
SA170783	Brain	C7
SA170853	Brain	C7
SA171528	Brain	C7
SA171953	Brain	C7
SA172008	Brain	C12
SA172287	Brain	C13
SA172373	Brain	C7
SA172658	Brain	C7
SA172799	Brain	C7
SA173009	Brain	C7
SA173029	Brain	C7
SA173124	Brain	C7
SA173697	Brain	C7
SA173907	Brain	C12
SA174052	Brain	C13
SA174182	Brain	C15
SA174237	Brain	C7
SA174372	Brain	C7
SA174412	Brain	C7
SA174427	Brain	C7
SA174687	Brain	C7
SA174837	Brain	C7
SA174947	Brain	C7
SA175777	Brain	C7
SA175902	Brain	C12
SA176022	Brain	C13
SA176057	Brain	C7
SA176825	Brain	C15
SA176885	Brain	C7
SA177236	Brain	C7
SA177525	Brain	C7
SA177590	Brain	C7
SA177705	Brain	C7
SA178490	Brain	C7
SA178795	Brain	C7
SA178850	Brain	C15
SA179020	Brain	C7
SA179190	Brain	C12
SA179315	Brain	C13
SA179900	Brain	C6
SA180317	Brain	C7
SA180322	Brain	C6
SA180725	Brain	C7
SA181025	Brain	C12
SA181110	Brain	C7
SA181345	Brain	C12
SA181360	Brain	C12
SA181420	Brain	C7
SA181655	Brain	C7
SA181780	Brain	C7
SA181880	Brain	C15
SA181965	Brain	C7
SA182040	Brain	C13
SA182592	Brain	C7
SA182882	Brain	C7
SA183022	Brain	C13
SA183192	Brain	C13
SA183702	Brain	C12
SA183747	Brain	C15
SA183842	Brain	C7
SA183997	Brain	C15
SA184257	Brain	C7
SA184357	Brain	C15
SA184644	Brain	C7
SA184803	Brain	C7
SA185138	Brain	C15
SA185858	Brain	C7
SA185923	Brain	C8
SA261058	Brain	C13
SA261091	Brain	C7
SA261151	Brain	C12
SA261160	Brain	C12
SA261181	Brain	C7
SA261184	Brain	C13
SA261220	Brain	C7
SA261298	Brain	C12
SA261311	Brain	C12
SA261334	Brain	C7
SA261373	Brain	C12
SA261406	Brain	C12
SA261436	Brain	C7
SA261454	Brain	C7
SA261523	Brain	C12
SA261532	Brain	C7
SA261577	Brain	C12
SA261595	Brain	C7
SA261643	Brain	C7
SA261646	Brain	C7
SA261700	Brain	C7
SA261715	Brain	C7
SA261769	Brain	C12
SA261784	Brain	C7
SA261814	Brain	C7
SA261841	Brain	C12
SA261893	Brain	C12
SA261904	Brain	C7
SA261951	Brain	C7
SA261961	Brain	C12
SA262024	Brain	C7
SA262027	Brain	C7
SA262081	Brain	C12
SA262123	Brain	C11
SA262126	Brain	C11
SA262180	Brain	C13
SA262183	Brain	C7
SA262234	Brain	C7
SA262235	Brain	C7
SA262288	Brain	C12
SA262339	Brain	C7
SA262354	Brain	C12
SA262381	Brain	C12
SA262459	Brain	C7
SA262472	Brain	C12
SA262540	Brain	C7
SA262579	Brain	C7
SA262588	Brain	C13
SA262615	Brain	C7
SA262624	Brain	C12
SA262691	Brain	C12
SA262702	Brain	C15
SA262726	Brain	C12
SA262777	Brain	C15
SA262816	Brain	C7
SA262819	Brain	C7
SA262873	Brain	C12
SA262888	Brain	C7
SA262928	Brain	C12
SA262990	Brain	C12
SA263023	Brain	C7
SA263059	Brain	C6
SA263074	Brain	C12
SA263104	Brain	C7
SA263133	Brain	C7
SA263139	Brain	C12
SA263178	Brain	C7
SA263196	Brain	C15
SA263211	Brain	C7
SA263280	Brain	C6
SA263283	Brain	C12
SA263334	Brain	C12
SA263355	Brain	C7
SA263382	Brain	C7
SA263391	Brain	C7
SA263448	Brain	C12
SA263457	Brain	C12
SA263472	Brain	C11
SA263487	Brain	C12
SA263532	Brain	C7
SA263535	Brain	C12
SA263592	Brain	C7
SA263607	Brain	C7
SA263617	Brain	C7
SA263676	Brain	C12
SA263679	Brain	C7
SA263715	Brain	C12
SA263730	Brain	C7
SA263787	Brain	C12
SA263802	Brain	C7
SA263853	Brain	C7
SA263874	Brain	C15
SA263895	Brain	C7
SA263916	Brain	C12
SA263982	Brain	C15
SA264003	Brain	C12
SA264036	Brain	C12
SA264069	Brain	C7
SA264084	Brain	C12
SA264141	Brain	C7
SA264156	Brain	C7
SA264189	Brain	C7
SA264210	Brain	C7
SA264267	Brain	C7
SA264276	Brain	C12
SA264327	Brain	C12
SA264336	Brain	C7
SA264337	Brain	C7
SA264387	Brain	C12
SA264429	Brain	C12
SA264456	Brain	C6
SA264474	Brain	C7
SA264512	Brain	C12
SA264542	Brain	C7
SA264563	Brain	C12
SA264611	Brain	C7
SA264624	Brain	C13
SA264644	Brain	C12
SA264681	Brain	C13
SA264704	Brain	C7
SA264731	Brain	C15
SA264752	Brain	C7
SA264809	Brain	C12
SA264818	Brain	C12
SA264899	Brain	C7
SA264908	Brain	C12
SA264947	Brain	C12
SA264968	Brain	C12
SA265004	Brain	C13
SA265050	Brain	C7
SA265073	Brain	C15
SA265139	Brain	C12
SA265154	Brain	C7
SA265190	Brain	C12
SA265199	Brain	C12
SA265260	Brain	C12
SA265292	Brain	C12
SA265310	Brain	C13
SA265313	Brain	C13
SA265370	Brain	C12
SA265379	Brain	C12
SA265421	Brain	C7
SA265435	Brain	C7
SA265469	Brain	C12
SA265484	Brain	C15
SA265535	Brain	C7
SA265538	Brain	C12
SA265565	Brain	C7
SA265619	Brain	C12
SA265667	Brain	C12
SA265676	Brain	C7
SA265724	Brain	C7
SA265727	Brain	C12
SA265787	Brain	C12
SA265796	Brain	C12
SA265823	Brain	C12
SA265850	Brain	C12
SA265868	Brain	C8
SA265913	Brain	C12
SA265952	Brain	C7
SA265973	Brain	C12
SA265982	Brain	C7
SA266039	Brain	C12
SA266042	Brain	C7
SA266099	Brain	C12
SA266108	Brain	C12
SA266117	Brain	C10
SA266186	Brain	C7
SA266207	Brain	C7
SA266216	Brain	C7
SA266276	Brain	C13
SA266327	Brain	C12
SA266348	Brain	C15
SA266420	Brain	C13
SA266429	Brain	C7
SA266438	Brain	C12
SA266477	Brain	C7
SA266489	Brain	C12
SA266510	Brain	C12
SA266579	Brain	C12
SA266582	Brain	C7
SA266639	Brain	C7
SA266642	Brain	C13
SA266697	Brain	C12
SA266720	Brain	C12
[truncated: 10,272 more rows]

## Sheet: Supplementary Table S3
Table S3. Contribution of each cancer type in proposed cancer subtypes
		Cancer Subtype
		C1	C2	C3	C4	C5	C6	C7	C8	C9	C10	C11	C12	C13	C14	C15	C16	C17	Sum
Cancer Type	Bladder	0	0	0	0	0	31	50	1	24	0	0	8	44	5	54	19	0	236
	Blood	81	105	64	0	19	1	443	2	1	34	16	7	3	1	14	255	33	1079
	Bone	30	8	0	0	52	1	89	0	0	0	0	11	3	0	6	27	0	227
	Brain	140	27	0	0	91	23	430	34	0	4	7	167	50	0	51	35	2	1061
	Breast	195	101	0	0	2	45	718	3	1	1	2	234	74	6	75	376	21	1854
	Cervix	0	0	0	0	0	20	107	1	5	0	0	1	25	5	37	7	0	208
	Colorectal	0	0	5	4	0	19	62	4	0	4	2	72	85	26	120	118	15	536
	Esophagus	1	1	0	1	2	26	57	0	0	1	1	76	32	1	33	166	145	543
	Head&Neck	1	0	0	24	0	16	190	288	0	35	0	45	23	2	30	55	2	711
	Kidney	7	6	0	0	0	16	607	1	12	2	3	9	39	0	34	80	3	819
	Liver	5	6	0	0	2	110	379	4	1	3	5	114	107	6	92	336	10	1180
	Lung	0	0	23	0	0	66	26	0	1	0	0	20	69	16	48	26	28	323
	Nervous_system	0	0	0	0	0	0	97	0	0	2	6	1	0	0	0	0	0	106
	Ovary	2	2	0	0	0	9	25	0	0	0	0	77	13	0	6	110	1	245
	Pancreas	37	45	0	0	7	1	138	1	0	1	0	131	16	2	30	403	9	821
	Prostate	206	289	2	0	39	5	214	4	0	1	0	15	22	2	28	208	1	1036
	Skin	5	7	0	0	1	28	30	25	0	6	0	1	53	79	61	155	185	636
	Stomach	1	1	0	0	1	31	72	1	0	0	0	31	45	29	62	57	8	339
	Uterus	0	2	0	0	0	12	77	1	0	1	1	47	44	14	55	39	17	310
	Sum	711	600	94	29	216	460	3811	370	45	95	43	1067	747	194	836	2472	480

## Sheet: Supplementary Table S4
Table S4. Top 100 significant genes with their corresponding P-value for each subtype separately.
Subtype C1		Subtype C2		Subtype C3		Subtype C4		Subtype C5		Subtype C6		Subtype C7		Subtype C8		Subtype C9		Subtype C10		Subtype C11		Subtype 12		Subtype C13		Subtype C14		Subtype C15		Subtype C16		Subtype C17
gene_symbol	pval	gene_symbol	pval	gene_symbol	pval	gene_symbol	pval	gene_symbol	pval	gene_symbol	pval	gene_symbol	pval	gene_symbol	pval	gene_symbol	pval	gene_symbol	pval	gene_symbol	pval	gene_symbol	pval	gene_symbol	pval	gene_symbol	pval	gene_symbol	pval	gene_symbol	pval	gene_symbol	pval
CSMD1	3.64974e-171	DPP10	1.48789e-246	NBPF8	1.31418e-150	MUC6	7.84163e-30	DMD	9.04442e-08	TTN	6.17542e-168	VHL	0.0834353	BRAF	0	MUC4	1.38191e-39	NRAS	4.27594e-128	PTPN11	2.87989e-53	TP53	0	PCDHGA2	0	PCDHGA3	2.05882e-113	PCDHA6	0	HECW1	0	CFH	0
RBFOX1	1.1253e-160	RBFOX1	4.16778e-244	NBPF11	2.90182e-139	MUC3A	5.49018e-23	CSMD1	1.03381e-06	MUC16	3.07494e-18	CT47A10	0.672376	RP13-996F3.4	0.443478	ANKRD36	8.15081e-06	CSDE1	9.16887e-118	AC003102.1	0.0369547	IDH1	2.38859e-14	PCDHGA1	0	PCDHGA2	8.13161e-113	PCDHA7	0	MAD1L1	0	ADAM22	0
CNTNAP2	5.26316e-157	PCDH15	4.29097e-238	NBPF24	1.11519e-130	MUC3A	4.6263e-19	CNTNAP2	0.000200194	TP53	4.05077e-10	CT47A9	0.672376	ANKLE1	0.483004	COQ10A	0.000327369	GLUD2	0.0492993	ACTR8	0.0725573	KRAS	0.000283835	PCDHGA5	0	PCDHGA1	1.47392e-111	PCDHA5	0	SKAP2	0	TLL1	0
PTPRD	9.25732e-150	PTPRD	2.0558e-235	NBPF12	1.23037e-122	AP2A2	7.96187e-15	IL1RAPL1	0.000289405	FLG	3.51473e-06	AMY1B	0.713886	AC090186.1	0.509919	SCXA	0.000465808	ALPPL2	0.322618	ALG10B	0.0782044	SPATA31A2	0.535191	PCDHGA6	0	PCDHGA4	3.18296e-107	PCDHA4	0	THSD7A	0	CDH10	0
PCDH15	1.06207e-135	LSAMP	2.13696e-231	NBPF20	3.66146e-119	TAS2R43	1.7481e-13	HLA-DRB1	0.000301569	MAGEA6	0.00271512	CT47A8	0.892698	KRTAP4-5	0.644852	HLA-B	0.00171576	NEFH	0.350112	FITM1	0.101284	RP13-996F3.4	0.717433	PCDHGB2	0	PCDHGB1	6.14076e-107	PCDHA2	0	DNAH9	0	PTGER3	0
LSAMP	3.12592e-130	ROBO2	6.8817e-225	NBPF16	3.11525e-117	TAS2R14	9.44133e-08	PTPRD	0.00211191	SNX17	0.00478146	MAGEA9B	0.926042	GAGE13	0.658077	ZNF84	0.00171786	CNPY2	0.357835	C9orf169	0.107955	PRAMEF21	0.720392	PCDHGB1	0	PCDHA4	5.16878e-103	PCDHA1	0	GAS7	0	MPPED2	0
ROBO2	7.86435e-116	CTNNA2	1.62952e-222	NBPF10	2.96342e-101	AC090186.1	9.45523e-08	PTPRN2	0.01348	AGER	0.0112728	PRR20C	0.945603	LIMS3	0.658077	KDM6A	0.00199024	OR8A1	0.369329	SELO	0.112136	C9orf53	0.753207	PCDHGA3	0	PCDHGB2	1.27433e-101	PCDHA3	0	ADAM22	0	STON1-GTF2A1L	0
EYS	1.13386e-112	EYS	1.82209e-222	USP17L5	3.21123e-99	TAS2R46	2.00627e-07	HLA-DRB5	0.0286609	NDUFAF3	0.0149115	HSFX1	0.960049	GAGE2B	0.688171	TPSAB1	0.00239025	SRSF10	0.378299	EMC9	0.113603	SPATA31A1	0.780154	PCDHGB3	0	PCDHA3	4.7822e-100	PCDHA8	1.54346e-295	MGST1	0	ITGA8	0
CTNNA2	3.17348e-104	CSMD1	3.0773e-222	NBPF9	1.61356e-97	PRR4	2.04442e-06	GPC6	0.0588773	KMT2D	0.0235272	CT47A7	0.964869	BOLA2B	0.724227	SELPLG	0.00295883	CST6	0.382868	FAM180B	0.121638	RP11-508N12.4	0.810793	PCDHGA4	0	PCDHA2	3.21139e-98	PCDHA9	1.7904e-262	CLDN11	0	BRINP1	0
DPP10	1.23153e-100	CNTNAP2	1.6823e-220	USP17L27	1.5773e-96	KCNJ12	2.21279e-06	DPP10	0.0619249	DALRD3	0.0252083	CFC1B	0.970771	GAGE2C	0.748513	GGTLC2	0.00362503	ACOT4	0.412897	C11orf31	0.12396	RHOXF2B	0.89738	PCDHGB4	1.047e-321	PCDHA5	4.66134e-98	PCDHA10	6.62517e-161	CNTN1	0	OSBPL6	0
CTNNA3	3.87442e-83	LRRC4C	4.10857e-207	FRG2C	2.25143e-96	ZNF717	9.81812e-06	C16orf93	0.0632633	WDR6	0.0252083	CT47A6	0.975788	CT45A5	0.803344	SIK1	0.0046371	SEPHS2	0.412897	RNF208	0.12396	GPSM3	0.928164	PCDHGA7	6.0904e-319	PCDHA6	5.88389e-96	PCDHA11	4.25678e-98	NRXN3	0	CFHR2	0
LRRC4C	8.34094e-79	SGCZ	5.46572e-205	USP17L13	2.70013e-95	NEFH	2.47547e-05	LSAMP	0.0744502	AP4M1	0.0266493	RP11-345J4.3	0.983913	CCDC106	0.825947	GOLGA6L9	0.00571606	SASH3	0.426314	FAM173A	0.125125	SWSAP1	0.9451	PCDHGA8	1.75501e-273	PCDHGA5	1.88173e-95	PCDHA12	2.80678e-78	PRKCH	0	CDH7	0
LRP1B	4.5566e-76	GRID2	6.44891e-201	USP17L20	1.36144e-94	PRSS1	5.05826e-05	UBE2A	0.0795875	RNF5	0.0352312	CT47A5	0.988502	SSX4	0.859807	CS	0.0064009	TAS2R46	0.426314	METRN	0.125125	MARCKSL1	0.947048	PCDHGA9	5.57909e-183	PCDHA1	4.32496e-95	PCDHA13	5.95683e-32	VRK2	0	PGR	0
MACROD2	6.55761e-75	LRP1B	8.22379e-200	USP17L28	1.6722e-92	FAM186A	6.04215e-05	MACROD2	0.0987478	ATG9A	0.0352713	DDX3Y	0.990778	TOMM6	0.862698	WASH4P	0.00741952	MST1R	0.450474	TMEM55B	0.128636	ERAS	0.954351	PCDHGB6	1.08756e-157	PCDHA7	3.27344e-91	AC005609.1	1.78909e-31	LRRC7	0	SLCO1A2	0
SGCZ	2.07053e-73	CSMD3	1.72879e-180	TBC1D3H	1.04228e-91	SAA1	6.87588e-05	RPS17L	0.101102	ABCB6	0.0372029	CT45A3	0.99454	USP17L25	0.868178	SPATA31A5	0.0103172	FUT6	0.456563	PSME1	0.129812	TEX28P2	0.95484	PCDHGA10	1.55132e-135	PCDHGB3	4.95775e-85	TTN	1.27542e-12	FUT8	0	ABCB1	0
GPC5	3.21233e-69	CNTN5	4.19532e-180	USP17L25	4.935e-90	BRAF	9.32695e-05	SLC41A1	0.114074	TPR	0.0388311	HIST2H4A	0.998443	ZNF581	0.870614	SLC39A7	0.0107243	CCNA2	0.468153	APEX1	0.135728	AC007952.5	0.95484	PCDHGB7	5.74763e-105	PCDHA8	2.99952e-82	PCDHAC1	1.7721e-08	APBA2	0	FOLH1	0
GALNTL6	1.72928e-68	CADM2	1.66378e-174	TBC1D3C	3.19237e-86	PRR14	0.000127173	HLA-DQB1	0.115963	PBX2	0.0403534	SLX1B	0.998548	WBSCR16	0.870985	AHNAK2	0.0112425	NGFRAP1	0.468286	C8orf44	0.149104	LYPLA2	0.956023	PCDHGA11	3.04892e-75	PCDHGA6	1.159e-80	TP53	1.87802e-06	TLL1	0	NME8	0
GRID2	2.31998e-68	CTNNA3	1.37865e-167	USP17L21	1.78843e-85	FBRS	0.000437777	CTNNA3	0.121589	APOB	0.0481001	PRR20B	0.999152	USP17L24	0.872174	FGFR3	0.0125258	CYSLTR2	0.478334	CCDC78	0.158737	USP11	0.956263	PCDHGA12	7.34817e-31	PCDHA9	5.59764e-78	CTC-554D6.1	0.00046789	TRIO	0	EPDR1	0
PTPRN2	8.68011e-68	PRKG1	2.20968e-164	NBPF15	2.59791e-85	PCMTD1	0.000498834	CEBPE	0.127953	SRRM2	0.0510051	SERF1A	0.999416	HNRNPH2	0.875311	MIEN1	0.0135659	ORM1	0.498341	OR2AG2	0.173632	RILP	0.9574	TTN	4.06036e-24	TTN	1.59607e-73	PCDHAC2	0.00220537	MSR1	0	NOX4	0
CDH12	2.49541e-67	GALNTL6	4.16108e-160	NBPF14	1.20394e-83	CDKN1C	0.000589318	PDZK1IP1	0.133564	BAP1	0.056572	SLX1A	0.999596	KTI12	0.878293	FRG1B	0.0143181	PAN2	0.498369	KDELR1	0.176138	NAT8	0.95954	PCDHGC3	7.54705e-24	PCDHGB4	1.03328e-71	MUC16	0.0038771	STAU2	0	NOS1	0
CADM2	1.27419e-66	MACROD2	8.81853e-160	RP11-146D12.2	1.13395e-82	CNN2	0.000750874	FUNDC1	0.138425	MCM7	0.0636288	PRR20D	0.999598	KRTAP10-4	0.879269	XAGE1A	0.0145912	RAB40AL	0.504453	BTBD18	0.191293	DNAJC28	0.963619	PCDHGC5	3.69015e-14	PCDHGA7	7.80303e-71	RECQL4	0.00859869	CDH10	0	TBX15	0
DCC	2.29007e-66	KCNIP4	5.08151e-153	USP17L26	3.68958e-82	PABPC1	0.00109424	CSMD3	0.147526	TMEM147	0.0672352	HIST2H4B	0.999723	P2RY4	0.881209	XAGE1B	0.0145912	FST	0.5106	LTB4R	0.195111	C1orf123	0.968842	PCDHGC4	9.15511e-13	PCDHGA8	1.20972e-65	PCDHB8	0.00984164	MYO16	0	SEZ6L	0
DPP6	3.55427e-65	SNTG1	2.81078e-150	ANKRD20A3	4.55303e-82	AC018630.1	0.00162446	PHKG2	0.155997	CTNNB1	0.0774752	AGAP10	0.999775	DRD5	0.891463	MUC2	0.016403	GALT	0.5106	PLA2G2D	0.196386	RNF113A	0.97302	TP53	2.38083e-07	PCDHA10	3.79206e-64	AP002956.1	0.0108968	USH2A	0	NOL4	0
DLG2	8.17933e-64	OPCML	6.31419e-150	USP17L24	2.30389e-81	TAS2R31	0.00170802	AC010877.1	0.15614	FLJ00273	0.0809199	SULT1A4	0.999781	SERINC4	0.892763	AGAP8	0.0180921	TSR1	0.525053	OSGEP	0.200218	AC105020.1	0.974952	MUC16	1.79513e-05	MUC16	1.22739e-60	LRRC24	0.0177915	ZPBP	0	SGCG	0
KCNIP4	5.80506e-63	DPP6	1.34957e-149	RP11-458D21.5	3.07929e-80	MUC20	0.00208816	EYS	0.176639	GGN	0.0947602	SPATA31A4	0.999809	FOXO4	0.893255	PCDHB3	0.0205106	CYP2D6	0.53688	PRAMEF22	0.218421	PRAF2	0.977422	PCDHB8	0.00020117	PCDHA11	4.55685e-53	AHNAK2	0.0196522	TG	0	ATP8B4	0
CSMD3	6.87749e-63	NRG1	2.24129e-149	NBPF1	7.07832e-80	ZNF141	0.00214318	F8A2	0.192026	MBD6	0.0961246	SPATA31A7	0.999852	GAGE12J	0.89374	RXRB	0.0210681	APOA5	0.53688	GOLGA6L10	0.223921	RCE1	0.979741	TAF1L	0.00651429	PCDHGA9	3.67718e-50	KIFC2	0.021378	CTNNA1	0	GDAP1	0
CNTN5	1.22126e-62	MDGA2	8.1584e-149	USP17L19	1.03935e-79	MUC16	0.00252658	PTPMT1	0.197621	TCEB3C	0.096672	GOLGA6L9	0.999855	GPR101	0.895505	KBTBD4	0.0217293	THAP3	0.541555	SLC4A1	0.227773	HNRNPH2	0.980037	PCDHB16	0.00729491	PCDHA12	1.04379e-46	IRF7	0.026652	CNTLN	0	RUNDC3B	0
NRXN3	6.01086e-61	MDGA2	9.2709e-149	FRG1B	1.59242e-79	OR8U1	0.00276252	EIF1AY	0.200381	MYH7	0.101099	H2AFB1	0.999868	PRAMEF13	0.896963	ABCC10	0.0239506	SUMO4	0.548914	HAGHL	0.228573	ZNF84	0.980782	RP11-508N12.4	0.00795291	PCDHGB6	3.36937e-43	FAM47C	0.0269502	EPHA3	0	SFRP4	0
NRG1	4.08091e-58	CDH12	2.67242e-148	ANKRD20A2	1.58316e-77	RBMXL1	0.00312604	TBL1Y	0.204104	FLNA	0.102647	GAGE12D	0.999868	NPIPB3	0.900089	XAGE1E	0.0253978	NOXO1	0.550809	FDCSP	0.235065	CCL3L1	0.984898	CTC-554D6.1	0.0104236	MXRA5	3.94353e-38	MRPS34	0.0318256	PREX2	0	SH3GL2	0
NRG3	9.73885e-56	NRXN3	3.02348e-148	TBC1D3G	7.29051e-77	SLC22A18AS	0.00325716	RBFOX1	0.212062	TARS2	0.10421	TSPY2	0.999897	CT45A4	0.900089	TP53TG3B	0.0253978	OR9I1	0.553102	RP11-468E2.6	0.241571	LAMB2	0.985857	PCDHB3	0.0180374	PCDHGA10	6.10945e-38	CXorf65	0.0355227	ARAP2	0	EBF3	0
CCSER1	1.4422e-55	GPC5	3.55494e-145	USP17L17	6.32928e-76	SLC25A5	0.00332349	TRAPPC5	0.230523	INO80E	0.106083	HIST2H3C	0.999897	PARD6A	0.908164	ERBB2	0.0254298	ERAS	0.555931	AMPD2	0.244176	HIGD1B	0.988415	PCDHB2	0.0221778	PCDHB8	3.17206e-35	LRRC14	0.0537954	ANO2	0	CPE	0
OPCML	1.7412e-55	DCC	3.83163e-144	CBWD7	5.83887e-75	AQP7	0.00476629	RNF40	0.231334	HIST2H2AC	0.106333	AL353608.1	0.999897	SWSAP1	0.909284	ATP12A	0.0257837	TPSG1	0.569729	IL17RB	0.250695	ACP5	0.988424	FLG2	0.0258028	FLG	4.88647e-33	PCDHB14	0.0635781	HDAC9	0	GLRB	0
MDGA2	4.19135e-55	CCSER1	1.23063e-143	USP17L29	7.0504e-75	TMUB1	0.00588377	ROBO2	0.253913	HTRA2	0.110615	RP11-347C12.3	0.999897	SFTPC	0.910095	CYC1	0.0261225	SLC2A4	0.573372	HIST1H2AD	0.25461	NDUFA1	0.988561	KMT2D	0.0294456	DNAH5	1.79187e-31	FLNA	0.0888527	SNX29	0	ZBTB16	0
MDGA2	1.3169e-54	CNTNAP5	4.3169e-143	USP17L12	8.084e-75	NKG2-E	0.00690407	TSEN34	0.263424	AUP1	0.11231	CCL3L3	0.999909	NGFRAP1	0.916955	ZNF202	0.0264302	ANKLE1	0.579982	TUBGCP6	0.263634	UBQLN2	0.988676	HRNR	0.0309269	MYH2	5.06064e-28	C8orf82	0.0920332	CELF2	0	LIN7A	0
PRKG1	4.80992e-53	DLG2	1.29508e-142	USP17L18	3.4041e-73	C2CD4A	0.00709397	FAM8A1	0.266246	HIST2H2AB	0.113795	GOLGA6L9	0.999927	CTD-2278I10.6	0.919901	HIST1H1B	0.0264302	FAM111A	0.582168	TRIM73	0.266581	TUBB4B	0.988874	FLG	0.0410866	OBSCN	6.42839e-28	PCDHB7	0.092602	ADAMTS6	0	SLCO1B3	0
SNTG1	2.92484e-52	LPHN3	1.94564e-139	PRAMEF6	5.25682e-73	GPAT2	0.00732874	LRRC4C	0.269336	ECM1	0.114997	PRAMEF3	0.999927	PDZD11	0.923784	NUTM2D	0.0276855	RHBDL1	0.584347	HAUS5	0.270287	PNRC2	0.98952	AHNAK2	0.0568163	PCDHA13	2.35667e-27	GMPPB	0.0964356	LTBP1	0	OPRM1	0
DMD	1.83128e-51	RP11-127H5.1	2.16699e-138	PRAMEF15	7.75641e-73	SLC35E2B	0.00932654	C19orf59	0.270135	PCDHB8	0.116809	RP13-996F3.4	0.999928	TCEB3CL	0.923784	TMPRSS13	0.0279964	NPM3	0.592634	POTED	0.289887	TRIAP1	0.989608	CFC1B	0.059099	PCDHGB7	4.54164e-27	AMIGO3	0.0964356	RCN1	0	BMP5	0
MGAT4C	1.36218e-49	MAGI2	1.23632e-136	FAM182B	2.35308e-72	ATP2B3	0.00943836	TSPO	0.276883	SMPD2	0.119151	GOLGA6L10	0.999938	KRTAP10-5	0.924641	GOLGA6L10	0.0285781	STUB1	0.592978	HIST1H3D	0.291193	CREB3	0.989619	MUC5B	0.064178	PCDHB7	9.07183e-27	ZNF646	0.11186	ARID1B	0	IMPG1	0
AGBL4	1.06933e-47	NRG3	1.41579e-133	TBC1D3B	1.90373e-70	ABCA7	0.0105834	GZMH	0.28707	AHNAK2	0.12043	RIMBP3B	0.999969	ENKD1	0.926134	HSFX2	0.0289742	ZNF259	0.592978	C12orf43	0.297718	EEF1B2	0.989674	STUB1	0.0643901	CELSR3	3.87595e-26	ATP6AP1	0.122029	PTGER3	0	GHR	0
ASIC2	1.29141e-47	CNBD1	4.32658e-129	USP17L30	5.50398e-69	KLRC2	0.0148169	CTD-3214H19.16	0.2939	SPTA1	0.121026	GAGE12E	0.99997	KRTAP4-3	0.930454	AQP7	0.0295912	SIGMAR1	0.595818	ZBTB21	0.308142	SUV39H1	0.989916	PCDHB7	0.0755125	TNXB	6.37691e-26	SRPK3	0.14029	COL23A1	0	GABRG2	0
CDH18	2.15736e-47	CDH18	2.82278e-127	GOLGA8R	1.97173e-68	CFHR1	0.0159384	AC007919.2	0.295221	PRDX5	0.122217	FAM27D1	0.99997	PIM2	0.93106	ABCB6	0.0307227	CDCA3	0.597244	SPRYD3	0.313346	MBD3L4	0.990435	MAGEA6	0.0819678	AHNAK2	6.92628e-26	AUP1	0.156736	FSTL4	0	NEK11	0
MAGI2	7.34363e-46	NELL1	9.31378e-125	PRAMEF9	8.74324e-67	KIR3DL3	0.0175606	PCDH15	0.334541	FAM83H	0.12369	FAM90A26	0.999982	NPB	0.932774	CT47A7	0.0325377	RP11-426L16.10	0.599365	VCX3B	0.316695	IFITM1	0.990535	FLNC	0.0858962	RYR1	7.73632e-25	AGAP10	0.170045	FOXN3	0	PEX5L	0
PARK2	1.13872e-45	ERBB4	1.31393e-120	HLA-DRB1	9.82236e-66	SAA2	0.0179581	CCSER1	0.335204	NDUFA4L2	0.124488	OPN1MW2	0.999983	MAGEH1	0.933077	METTL1	0.0326699	CTD-2278I10.6	0.603037	GIPR	0.321138	PRAMEF13	0.990553	PARD6A	0.0865939	APOB	1.54095e-24	CT47A12	0.170093	KCNQ1	0	TACR1	0
PDE4D	3.03392e-41	NEGR1	1.03754e-119	ANKRD36	6.92929e-65	MUC12	0.0200933	HMGB3	0.343049	RANBP6	0.127457	DDTL	0.999984	RAB41	0.937677	MTMR11	0.03286	PCSK1N	0.605222	DDX24	0.340531	AL035588.1	0.991667	KLHL34	0.0946274	MUC17	2.79065e-24	HSPA1A	0.170876	HHAT	0	LEPR	0
NAALADL2	2.12298e-40	CNTN4	1.45559e-118	POM121L7	5.61725e-62	MICA	0.021764	AL645728.1	0.349305	C1QL4	0.128834	DUX4L3	0.999986	AC006449.1	0.938992	ZSWIM4	0.0329525	GPSM3	0.609844	HIST1H2BF	0.343106	GPR174	0.991707	PHPT1	0.098949	HBG2	2.96255e-24	AMER1	0.170992	TBC1D22A	0	ST6GALNAC5	0
NKAIN2	2.72335e-40	LRRTM4	4.07478e-118	FRG1	1.34104e-61	TPSAB1	0.0222123	KLHL34	0.351061	TAP1	0.132588	GAGE2B	0.999987	SDR39U1	0.939235	TMEM179B	0.0331052	TCEAL4	0.611371	TENC1	0.344392	EPOR	0.991707	RBMY1E	0.100255	RP1	5.30739e-24	EXOSC4	0.177125	KMT2C	0	MROH9	0
GPC6	6.29585e-40	PDE4D	6.91306e-117	ANKRD36C	2.13772e-61	LILRB2	0.0225102	OR2T7	0.35126	FCHSD1	0.13526	GAGE12J	0.999988	LGI3	0.939661	ABHD17A	0.0335435	C12orf71	0.611371	C1orf145	0.346963	ARMCX2	0.992113	FAM71A	0.101861	TCEB3C	9.62418e-24	NME3	0.178972	CCDC85A	0	SLC16A7	0
CNBD1	1.22473e-39	ASIC2	7.40873e-116	USP17L22	6.89306e-61	ATXN3	0.0234739	TMSB4Y	0.358827	GPR45	0.136599	HIST2H3A	0.99999	CBY3	0.942642	DISP2	0.0360626	JMJD8	0.611915	TMEM253	0.354364	SAPCD1	0.992817	EPPK1	0.104539	EVPL	1.97917e-23	CT47A9	0.190805	CDK14	0	OLFM3	0
LRRTM4	2.53822e-39	NKAIN2	4.1643e-115	ANKRD30BL	3.08769e-59	TPSD1	0.0262282	TCEAL4	0.358939	IRF7	0.140221	DUX4	0.99999	ARMCX2	0.94369	FAM156B	0.0360884	DVL2	0.616032	AP001925.1	0.36346	TCTEX1D4	0.992971	NRAS	0.110976	COL7A1	1.17091e-22	IRF2BPL	0.19284	RIMBP2	0	PCDH17	0
2020-03-01	2.55648e-39	MGAT4C	6.06501e-115	FAM27C	8.92285e-59	PSPH	0.0292284	PSMG3	0.359075	PNKP	0.140836	F8A1	0.999993	C19orf67	0.945105	CT47A6	0.0360884	PMM1	0.616032	GPKOW	0.365714	EXOSC4	0.99312	HYAL3	0.1118	TCEB3B	2.39637e-22	RHBDL1	0.197036	COL11A1	0	DNAH7	0
DAB1	3.9087e-39	NAALADL2	1.93869e-114	USP17L11	4.23778e-58	KIR2DL4	0.030474	SCGB1C1	0.379665	CCL27	0.143366	SPATA31A1	0.999993	GTF2H2C	0.947714	BX649567.1	0.036288	RP11-934B9.3	0.620116	CKMT1A	0.376869	C1orf122	0.993478	ZNF645	0.113465	CDK3	2.76662e-22	ANKRD34A	0.204065	LIMCH1	0	GRIA2	0
NELL1	8.53516e-39	PARK2	1.3723e-112	GAGE12F	1.54602e-57	HLA-C	0.0316971	VCY1B	0.381249	HIST2H2BE	0.14372	RGPD5	0.999997	GLA	0.947834	MUC16	0.0391226	FUT3	0.626181	ZCCHC3	0.381277	GPAT2	0.993513	PLEC	0.113539	PCDHB16	4.98912e-22	DCAF12L2	0.210865	EYA2	0	SOHLH2	0
TMEM132D	3.86071e-37	FHIT	6.83948e-110	AC008132.13	6.01015e-57	RFPL3	0.0325241	LGALS12	0.383903	TRMT112	0.14641	BOLA2B	0.999997	SAMD1	0.947834	ZNF205	0.0395181	TEX13B	0.626332	USP17L18	0.387832	ADAMTSL4-AS1	0.993513	WDR90	0.114662	STAB1	1.21929e-21	KRAS	0.21186	ANKRD44	0	ADRA1A	0
LPHN3	4.52578e-36	DMD	4.06444e-108	USP17L15	7.40873e-57	NRAS	0.0334988	SATL1	0.387851	IGFLR1	0.152604	AC007952.5	0.999997	CDPF1	0.947834	DLK2	0.0399988	FAM229A	0.629256	C2orf16	0.388893	NME3	0.993841	KMT2B	0.117573	PCLO	1.29962e-21	HSPA1L	0.212174	CTNNA2	0	PTGFR	0
CNTNAP5	3.528e-35	GRM8	4.83323e-108	RP11-514P8.7	9.95656e-56	ZXDB	0.0370113	MIOX	0.39485	PRG4	0.154544	AL050303.1	0.999998	IL2RG	0.94915	CT47A5	0.0431518	CFHR1	0.631396	TIMM8B	0.390002	AF196779.12	0.993884	ENKD1	0.122286	FLNC	3.96867e-21	RBMY1A1	0.220595	SYT1	0	BBS9	0
CDH13	1.62562e-34	NKAIN3	8.1572e-108	GAGE12G	1.28014e-53	CCBL2	0.0396681	ZMYM3	0.396515	U2AF1L4	0.162658	OR4F21	0.999998	BAG5	0.94915	NDUFAF3	0.0434476	SLC25A5	0.632156	TMX2	0.390147	AC008443.1	0.993963	NME3	0.125913	PCDHB10	4.15465e-21	MUC5B	0.221431	NAV3	0	TWIST1	0
SPAG16	2.02953e-34	NTM	8.96509e-108	POTEM	1.64566e-53	CAMKK2	0.0428681	IFITM1	0.401974	FKBP2	0.16732	GAGE13	0.999998	DOLK	0.94915	CYP27B1	0.0439522	C17orf100	0.632156	U2AF2	0.395154	HIST1H4B	0.994151	APOB	0.126354	PCDHB13	4.46422e-21	TRIM46	0.225022	HDAC4	0	NECAB1	0
FSTL5	7.21432e-34	AGBL4	7.74327e-103	GOLGA8O	1.84167e-53	KIR2DL3	0.0430789	ITPRIPL2	0.403042	C9orf131	0.169607	PRAMEF18	0.999998	MRPL53	0.94915	PCDHB16	0.0458243	RSPH4A	0.632171	GADD45GIP1	0.398607	AC002553.1	0.994156	PRAMEF18	0.127347	NEB	5.1738e-21	FAM212A	0.227543	STON1-GTF2A1L	0	SNRPN	0
RUNX1	1.33731e-32	NRXN1	7.91447e-102	RGPD6	6.3492e-53	CDRT1	0.0484403	MBD3L5	0.406575	HAGHL	0.172263	SULT1A3	0.999998	AL109927.1	0.949303	ZNF174	0.0460002	PHF19	0.634152	CAMP	0.402864	ZSWIM1	0.994302	ACADVL	0.134952	KMT2B	1.51425e-20	PRSS53	0.230746	MAST4	0	LRRC6	0
NTM	5.03977e-32	RALYL	8.71875e-100	FOXD4L4	7.69048e-53	TAS2R30	0.0486024	SSX1	0.407018	RP1	0.172704	GAGE2C	0.999999	BEX2	0.950844	IMPDH2	0.0460002	MT2A	0.635034	KLK5	0.405115	ZNF319	0.994336	IFRD2	0.135334	PCDHB12	2.93981e-20	EMD	0.230781	SDK2	0	SLC6A11	0
CNTN4	5.39893e-32	THSD7B	1.92941e-99	PRAMEF13	2.44147e-52	GADD45G	0.0491839	GTPBP4	0.418895	RNF31	0.173849	DUX4L7	0.999999	ADAM30	0.950901	RIMBP3	0.0464658	RPP25L	0.635034	CLCNKA	0.406355	HSD17B8	0.994359	DVL2	0.137024	DNAH10	5.52841e-20	GPAA1	0.238604	RORA	0	TRIM5	0
ZNF385D	2.28112e-31	ROBO1	6.20538e-99	AL445665.1	2.8795e-51	HCST	0.0509438	ASMTL	0.425929	EIF2B4	0.177027	EIF3CL	0.999999	DRD4	0.951687	PTPMT1	0.0475671	OR6K2	0.637866	C1orf158	0.412538	FAM57A	0.994653	MBD1	0.138228	PLEC	7.08408e-20	EME2	0.258194	ARHGAP10	0	IQCA1	0
RYR2	3.42628e-31	CDH13	7.32147e-99	RGPD5	3.29325e-51	AVPR2	0.0527265	TSPY2	0.433947	COL7A1	0.18108	TSPY4	0.999999	PGAM4	0.952338	FASTK	0.0475671	HNRNPA0	0.63789	C17orf82	0.413381	RP11-1167A19.2	0.995091	CXorf65	0.139628	EPPK1	9.14167e-20	KLHL34	0.269022	RPS6KA2	0	SLC14A2	0
ROBO1	4.96878e-30	2020-03-01	1.60493e-98	GOLGA6L9	9.07405e-51	PRSS3	0.0536042	CTB-54O9.9	0.43664	HIST1H3I	0.182032	MAGEA6	1	LIPT1	0.95291	KBTBD4	0.0480953	ARL4C	0.63789	ITPRIPL1	0.413381	AOC2	0.995162	PCDHB13	0.14117	XIRP1	1.90098e-19	MBD6	0.270914	MYO3B	0	TRPC4	0
ERBB4	1.36653e-29	TMEM132D	4.04103e-98	ANKRD20A1	9.97004e-51	FRG1	0.0538702	C9orf91	0.437461	CNPPD1	0.182423	GAGE12F	1	TMUB1	0.95291	GATC	0.0486264	GPX1	0.63789	RGN	0.415462	FAM173A	0.995178	ACD	0.142857	PCDHGA11	3.46471e-19	HIPK4	0.27237	TRHDE	0	LRRIQ1	0
RP11-127H5.1	3.4954e-28	SPAG16	6.10926e-96	WASH4P	6.11176e-50	CDK11A	0.0561014	AC015660.1	0.439538	MUC5B	0.184921	HIST2H2AA3	1	AC011308.1	0.953787	PROCA1	0.0524253	TCEB3CL2	0.63789	PDHA2	0.416234	BRF2	0.995197	PCDHB6	0.154162	MGAM	5.00853e-19	MAGEC1	0.273058	SEMA3A	0	CFHR4	0
FAM155A	9.20004e-27	ZNF385D	1.26811e-94	NPIPA8	1.41361e-49	SIRPB1	0.0590639	LRP1B	0.442036	BOLA1	0.186354	SPATA31A5	1	KREMEN2	0.953892	XAGE1D	0.053652	FSHB	0.638088	HAL	0.417463	LZTS2	0.995203	PIK3CA	0.154447	DNAH1	9.9666e-19	FOXO4	0.276181	RASAL2	0	SLCO1B1	0
CDH4	9.98511e-27	STPG2	2.48151e-94	NOTCH2NL	1.86242e-49	TPSG1	0.059834	PPP2R3B	0.445182	PDCD11	0.186633	AGAP9	1	CD68	0.955267	EXOC7	0.0556794	FBRS	0.638088	ZNF524	0.417536	APOBR	0.995244	FOXO4	0.159032	FLG2	1.07377e-18	HELZ2	0.27947	FNDC3B	0	EPHA7	0
AUTS2	1.0823e-25	KHDRBS2	2.32942e-92	FOXD4L2	1.11626e-48	POLR2L	0.0632398	CSF2RA	0.447752	RUSC1	0.188387	FAM27E1	1	RP3-369A17.5	0.956555	FBXL15	0.0557937	YBX2	0.640044	OVOL3	0.419603	CFP	0.995346	PCDHB12	0.172066	EIF2B5	1.26045e-18	PLEKHJ1	0.281596	ARHGAP15	0	AOAH	0
GRM8	8.7006e-25	FAM155A	2.33747e-92	ANKRD20A4	2.30483e-48	AC010536.1	0.0638791	ASB11	0.457317	KLHL34	0.188623	CT45A5	1	C16orf86	0.957512	AKT1	0.0559937	AC103809.2	0.640044	ING2	0.423716	CITED1	0.995412	CCNA2	0.174292	HBE1	1.43024e-18	C11orf35	0.282257	RARB	0	SCN2A	0
PTPRT	9.03303e-25	FSTL5	1.55685e-91	AL627309.1	5.25535e-48	DONSON	0.0648603	ARAF	0.458136	MUS81	0.191604	USP17L23	1	OR11H12	0.957928	HIST1H2AM	0.0569392	AP1S2	0.640724	LTB4R2	0.423716	MAGEF1	0.995419	FCHSD1	0.176548	MYH4	2.23049e-18	GPRASP1	0.28369	ITGA8	0	SCN7A	0
TBC1D5	1.04183e-24	ANKS1B	1.37115e-89	GAGE2A	2.48382e-47	LGI4	0.0668451	TP53I3	0.462012	GPSM3	0.192864	PRAMEF5	1	FOXR2	0.958884	PCDHB2	0.0574087	KRT26	0.641991	FAM160A2	0.424814	TARBP2	0.995474	JMJD8	0.188331	DNAH8	4.32241e-18	TMEM198	0.302834	MAP2	0	TTC29	0
TENM2	1.45273e-24	CDH4	3.11651e-89	PRAMEF5	1.24958e-46	OR4C5	0.0672454	OSR2	0.467579	TROAP	0.194095	CCL3L1	1	HYPK	0.958884	C16orf93	0.0580961	RPS23	0.643535	GFER	0.425761	ZDHHC12	0.995474	PRAF2	0.190588	MAGEC1	4.52218e-18	NEFH	0.317915	AMPH	0	SLCO5A1	0
ANKS1B	2.4692e-24	PTPRT	2.38662e-87	CROCC	4.26967e-46	OR9G1	0.0684533	AC018445.1	0.476179	C7orf43	0.194734	TRIM73	1	COMTD1	0.959157	HIST1H2BO	0.0598525	ZRSR1	0.65184	SYNGR3	0.4278	SLC10A3	0.995491	VAT1	0.194267	MYH1	5.71454e-18	DCST2	0.326263	NEBL	0	SULF1	0
RGS7	6.46399e-24	BAI3	2.43287e-87	POTEB2	4.37918e-46	KIR3DL2	0.0684533	DUX4L2	0.478135	USP21	0.20092	RIMBP3	1	TRIM47	0.959649	MUC20	0.0609611	LCE1F	0.653505	DCTPP1	0.4278	SPATA25	0.995547	SNX17	0.197479	ZNF646	6.69028e-18	KMT2B	0.32725	ADCY2	0	LHCGR	0
NKAIN3	4.48729e-23	FGF14	8.507e-87	CBWD5	1.44447e-45	RFPL3S	0.0692642	ZNF692	0.48117	SLC25A22	0.203578	HIST2H2AA4	1	AC114546.1	0.960678	AC138969.4	0.0614438	UBXN1	0.65727	SUPT16H	0.428473	MUC1	0.99558	WDR54	0.205453	SPTA1	6.72971e-18	PTOV1	0.330914	RBFOX1	0	PTPRQ	0
KHDRBS2	6.14804e-23	TENM2	1.171e-85	AGAP10	2.34304e-45	TYROBP	0.0703936	OR1L6	0.481246	CNTNAP1	0.203947	SOX15	1	FRG1	0.960727	LAT	0.0634403	PNMA1	0.65727	RP11-77K12.1	0.428473	RPS6KB2	0.995634	MRPS34	0.205517	KMT2D	1.40798e-17	LSM2	0.337139	BRINP1	0	SRRM4	0
IL1RAPL2	1.61793e-22	PTPRN2	1.20254e-85	FAM27B	2.43351e-45	UTS2R	0.0710569	UAP1L1	0.481246	PRSS53	0.209855	KIAA1658	1	EIF4A1	0.960735	GGT1	0.0635222	AC018867.1	0.65727	GOLGA6B	0.429831	CT47A12	0.995641	RCE1	0.214436	HRNR	2.27067e-17	PRPF8	0.341863	RUNX1T1	0	NOVA1	0
FHIT	2.84472e-22	DAB1	4.0057e-85	GOLGA8Q	3.2098e-45	PGM3	0.0729683	FAM127B	0.48955	TNKS1BP1	0.210901	BX088651.1	1	REXO1L1	0.960735	RNF113A	0.0644152	PSME3	0.659152	USP17L17	0.431856	USP51	0.995641	PSME2	0.215801	PCDHB2	2.87067e-17	MFSD3	0.342835	RIMS1	0	RTN1	0
IL1RAPL1	6.06397e-22	IL1RAPL2	9.3993e-84	GAGE12H	1.45364e-43	ZNHIT2	0.0744044	PIRT	0.491287	C19orf24	0.211043	PRAMEF17	1	SOWAHD	0.961603	NAB2	0.0646584	TCEB3CL	0.659954	CD300A	0.433333	NPFF	0.995727	DCHS1	0.218667	SPEN	3.58109e-17	CT47A8	0.345239	EPHA6	0	SH3GL3	0
STPG2	2.4977e-21	GPC6	6.31284e-83	GAGE12E	7.31689e-43	SAPCD2	0.0757576	TSPY4	0.49132	KAT2A	0.212233	USP51	1	WDR54	0.961683	CTAGE9	0.0664229	CHTF8	0.662617	TP53RK	0.433873	CRIP1	0.995919	TPP1	0.218857	PEG3	5.22986e-17	TNFSF13	0.348207	SLC4A4	0	ADAMTS18	0
DGKB	2.51242e-21	DGKB	3.30919e-82	GOLGA8F	1.94971e-42	GRIN2C	0.0819561	HBZ	0.494087	TRO	0.214894	NPIPB3	1	TMEM121	0.961683	KRTAP10-7	0.0683777	KRTAP24-1	0.664727	SREK1	0.434545	EBLN2	0.995919	IRF7	0.218857	MROH2B	5.44923e-17	CDHR5	0.354081	CDH7	0	ASXL3	0
BAI3	5.01059e-21	EDIL3	3.72185e-82	MUC4	5.80282e-42	AK2	0.0875746	PRKCDBP	0.494087	RP11-508N12.4	0.218267	USP17L28	1	RAB1B	0.962508	ZBTB4	0.0685242	PHLDA3	0.665259	POLR2I	0.435883	PBX2	0.995943	TCEB3CL	0.219271	AC005609.1	5.79616e-17	PLXNB3	0.354081	MEF2C	0	CBLN2	0
NEGR1	2.3282e-20	LINGO2	5.40921e-82	AGAP8	7.02198e-42	GOLGA6L2	0.09095	TSC22D3	0.496111	LRRC16B	0.221003	USP17L29	1	OR2A42	0.962771	EPHB3	0.0689969	CNKSR1	0.668403	C16orf90	0.435883	MFAP2	0.996008	C2orf81	0.220692	DNAH2	1.39507e-16	PRRT2	0.365353	CADPS2	0	ST6GAL2	0
THSD7B	4.56798e-20	TBC1D5	6.84069e-82	FAM27A	1.14752e-41	CD151	0.0918728	AC018512.1	0.500808	FAM47C	0.221003	GAGE2E	1	FAM43B	0.963618	SF3B4	0.0690071	CGB	0.670482	MRPL12	0.435883	TOE1	0.996008	EXOSC4	0.229843	DSP	1.42755e-16	FOXH1	0.365797	WDR70	0	NXPH2	0
IQCJ-SCHIP1	4.76019e-20	GALNT13	1.54452e-81	AC138969.4	1.45771e-41	MAP2K3	0.0921256	KCNA7	0.511444	GPR62	0.221258	TMUB1	1	CXorf65	0.963618	UBC	0.0696391	CAMK2N2	0.670482	KBTBD4	0.437887	TRIM46	0.99603	RP1	0.242432	SPEM1	1.7926e-16	LTK	0.369014	COL19A1	0	ZNF385B	0
NRXN1	6.51513e-20	EPHA6	1.2523e-79	AQP7	1.69656e-41	B4GALT7	0.0933194	RASL11B	0.511689	IL11RA	0.229572	TCEAL8	1	GPR119	0.963904	DGKA	0.0704253	SCML1	0.673063	UQCR10	0.439883	ZCCHC18	0.996098	CHMP2A	0.248589	LAMB2	2.26083e-16	SLC25A5	0.374281	EPB41L3	0	TMEFF2	0
PCDH9	1.30862e-19	IQCJ-SCHIP1	4.7429e-79	TBC1D3	2.84492e-41	SPANXD	0.0947728	DACH2	0.513322	MEA1	0.22971	TSPY8	1	IRF7	0.964965	SPDYE2B	0.0705007	RBMX2	0.673063	MYCBPAP	0.441789	UBL4A	0.996114	NKAP	0.248982	NRAS	2.84583e-16	BAP1	0.379163	KCNK2	0	UNC80	0
RALYL	3.38514e-19	RGS7	8.36819e-78	ANXA8	3.8497e-41	MAN1B1	0.0965419	NDUFS3	0.520249	PSENEN	0.22971	ZNF84	1	AC020907.1	0.965002	XAGE1C	0.0709024	NPB	0.673063	APEX2	0.443855	SRSF10	0.996166	C9orf172	0.249098	FCGBP	8.01304e-16	TCTEX1D4	0.381588	ERC1	0	STAC	0
CTNND2	4.65074e-19	RYR2	1.06702e-76	AL591684.1	3.8497e-41	CCNDBP1	0.0969656	COMMD3	0.52037	CTU2	0.232973	PRAMEF9	1	STK16	0.965028	HIST1H3J	0.0709112	KIAA0930	0.67504	AC005606.1	0.443855	LBX2	0.996208	TAPBP	0.252653	MYH7	8.56784e-16	STUB1	0.383163	TRPM3	0	COL8A1	0
SDK1	3.52476e-18	HCN1	1.44457e-73	FAM230A	1.00033e-40	FRG2C	0.0976999	GPR82	0.522842	LPIN3	0.234433	PIGY	1	ZNF580	0.965028	HIST1H2AL	0.0728392	ARMCX1	0.675624	CLEC18A	0.445831	GPAA1	0.996208	PPRC1	0.267663	HSPG2	1.07551e-15	SOX15	0.383594	MECOM	0	CCDC39	0
FGF14	1.90431e-17	IL1RAPL1	3.07717e-73	GOLGA8N	1.09217e-40	TPM2	0.102139	MILR1	0.522842	DAZ3	0.234741	DDT	1	AL139099.1	0.966067	SPNS1	0.0734871	ANXA2R	0.675624	SGSM2	0.451372	GNG13	0.996259	RHBDL1	0.274418	UBR4	1.56564e-15	FBXL6	0.38978	EPDR1	0	PDGFC	0
WWOX	2.01695e-17	AUTS2	2.04952e-72	RP11-195B21.3	1.92232e-40	CSDE1	0.103066	TMEM238	0.526245	TCEB3B	0.234926	SPIN2B	1	DUSP7	0.966346	KRT19	0.0741377	TMEM203	0.675624	OR2T12	0.451372	CTAG2	0.996283	ZNF513	0.274418	PRRC2A	1.81214e-15	CCDC87	0.394253	NOX4	0	GABRA6	0
CALN1	2.43121e-17	FOXP2	2.75091e-72	POTEH	2.25709e-40	KRT10	0.103632	SNX12	0.528248	SNRNP200	0.236186	GSTT2B	1	RPL36A-HNRNPH2	0.966618	PRR20D	0.0743154	AC005003.1	0.675624	GPAT2	0.451717	AC022532.1	0.996283	UQCRQ	0.275845	HELZ2	1.97293e-15	HIRIP3	0.41608	ADAMTS2	0	HMGCLL1	0
AGBL1	2.68699e-17	PCDH11X	7.66158e-70	GAGE12C	3.83511e-40	RAD23A	0.105131	MID1IP1	0.528248	ZNF513	0.237476	VCX3B	1	AC004017.1	0.967099	SLC4A2	0.0752979	RFPL3	0.675658	RNASEH2C	0.453666	AC104841.2	0.996283	NPAP1	0.287216	FAM47C	2.0353e-15	APC	0.420228	PHACTR3	0	RNF217	0
TMEM132C	2.93142e-17	RUNX1	1.15531e-69	GOLGA6L10	4.53616e-40	TMEM256-PLSCR3	0.108904	AC011308.1	0.528248	GALT	0.237476	RP11-706O15.1	1	PORCN	0.967211	ZFP69	0.0754467	OR2Z1	0.675658	NCKIPSD	0.454942	KIAA1658	0.996402	CPSF1	0.288642	LAMA5	2.91217e-15	TMEM249	0.425501	DOCK3	0	SLC26A7	0
SGCD	1.00929e-16	SGCD	6.41632e-69	PRSS1	1.13556e-39	C17orf61-PLSCR3	0.108904	AC112721.1	0.528966	WDR46	0.240327	GSTT1	1	SRSF9	0.967211	CYP21A2	0.0761051	ZBTB22	0.679238	FZD5	0.455607	IRAK1	0.996481	CHRNG	0.288921	KIF4B	3.11983e-15	LRP1	0.431649	ARHGAP28	0	DPYS	0
GRM7	1.19307e-16	GRM7	8.29372e-69	GOLGA6B	2.02561e-39	HCAR2	0.109663	DUSP8	0.530998	IPO4	0.24284	KDM5D	1	CHMP4A	0.968055	PNCK	0.076766	LPAR4	0.681016	SSNA1	0.455607	C21orf119	0.996534	SSRP1	0.291257	CD163	4.72238e-15	PCBP1	0.436655	C20orf26	0	LRP12	0
GRID1	2.09793e-16	PCDH9	1.52546e-68	CDK11A	3.50455e-39	PRR19	0.110424	TM4SF2	0.531465	RELL2	0.244097	TGIF2LY	1	OVCA2	0.9681	MUC17	0.0773362	ZNF2	0.682787	VANGL2	0.459684	ADAM8	0.996586	ARFGAP2	0.294428	CSDE1	6.59224e-15	AC103809.2	0.440164	TASP1	0	SLC39A12	0
HS6ST3	2.01395e-15	AGBL1	3.64983e-67	POTEB	7.45404e-39	ENOSF1	0.112136	MAP2K3	0.532242	CD68	0.246918	CXorf24	1	PAQR4	0.96814	HIST2H4B	0.0777162	TAF9B	0.683189	AP000295.9	0.460866	UQCRQ	0.996653	PSME1	0.295347	SAMD9	9.32824e-15	CIDEB	0.440931	RPH3A	0	FAM13C	0

## Sheet: Supplementary Table S5
Table S5. Top 100 significant gene-motifs with their corresponding P-value for each subtype separately
Subtype C1			Subtype C2			Subtype C3			Subtype C4			Subtype C5			Subtype C6			Subtype C7			Subtype C8			Subtype C9			Subtype C10			Subtype C11			Subtype C12			Subtype C13			Subtype C14			Subtype C15			Subtype C16			Subtype C17
gene_affected	motif	pval	gene_affected	motif	pval	gene_affected	motif	pval	gene_affected	motif	pval	gene_affected	motif	pval	gene_affected	motif	pval	gene_affected	motif	pval	gene_affected	motif	pval	gene_affected	motif	pval	gene_affected	motif	pval	gene_affected	motif	pval	gene_affected	motif	pval	gene_affected	motif	pval	gene_affected	motif	pval	gene_affected	motif	pval	gene_affected	motif	pval	gene_affected	motif
ENSG00000183117	CT-A.G	2.8159e-79	ENSG00000183117	CT-A.G	7.07882e-161	ENSG00000162825	CT-A.T	3.08404e-80	ENSG00000169894	CT-C.G	2.14621e-33	ENSG00000133065	CA-G.G	8.10782e-15	ENSG00000155657	CT-A.G	8.52661e-30	ENSG00000134086	CA-T.G	7.96417e-07	ENSG00000157764	TA-G.G	0	ENSG00000145113	CT-G.T	7.54714e-30	ENSG00000009307	TC-T.G	7.26328e-67	ENSG00000179295	CT-T.A	4.15678e-13	ENSG00000138413	CT-A.G	8.45886e-110	ENSG00000204956	CT-G.G	5.87306e-155	ENSG00000181143	CT-T.C	7.03783e-77	ENSG00000204970	CT-G.G	5.28035e-209	ENSG00000078328	CT-A.G	9.50665583193e-313	ENSG00000101746	CT-T.A
ENSG00000155093	CT-G.G	1.82031e-66	ENSG00000185008	CT-A.G	2.73031e-110	ENSG00000203832	CT-A.T	1.30425e-75	ENSG00000228273	CT-C.G	1.46169e-30	ENSG00000103549	TA-C.G	8.10782e-15	ENSG00000155657	CG-T.T	2.00342e-27	ENSG00000134086	TA-C.C	8.61695e-05	ENSG00000198271	TA-C.G	2.14511e-11	ENSG00000145113	CT-T.G	7.54714e-30	ENSG00000213281	TC-T.G	4.1343e-64	ENSG00000179295	CT-G.A	1.30736e-10	ENSG00000141510	CT-C.G	1.23418e-97	ENSG00000081853	CT-G.G	2.17865e-151	ENSG00000155657	CT-T.C	7.21984e-76	ENSG00000204969	CT-G.G	1.5198e-205	ENSG00000078328	CA-T.T	2.32003e-268	ENSG00000111700	CT-T.A
ENSG00000155093	CT-A.G	2.70726e-63	ENSG00000150275	CT-A.G	2.54008e-102	ENSG00000203832	TC-A.T	1.0033e-68	ENSG00000169894	CA-C.T	9.43174e-28	ENSG00000156873	TA-C.G	8.10782e-15	ENSG00000155657	CT-T.T	1.70783e-19	ENSG00000134086	CG-G.G	0.000895338	ENSG00000160117	CA-A.A	1.67164e-10	ENSG00000145113	TC-C.G	7.54714e-30	ENSG00000009307	CA-A.A	2.77284e-32	ENSG00000179295	CA-G.C	4.00935e-08	ENSG00000141510	CT-G.G	1.3443e-74	ENSG00000254245	CT-G.G	2.17865e-151	ENSG00000204970	CT-T.G	1.88459e-66	ENSG00000255408	CT-G.G	5.19336e-202	ENSG00000078328	CT-G.G	1.11179e-259	ENSG00000118997	CT-T.A
ENSG00000153707	CT-A.G	1.3631e-56	ENSG00000174469	CT-A.G	5.46885e-101	ENSG00000163386	CG-T.T	6.7026e-62	ENSG00000228273	CA-C.T	9.43174e-28	ENSG00000196118	TA-C.G	8.10782e-15	ENSG00000155657	CT-T.A	2.2789e-18	ENSG00000134086	CT-C.G	0.000895338	ENSG00000269307	CA-A.A	1.67164e-10	ENSG00000145113	CG-T.A	1.18435e-21	ENSG00000009307	CT-A.C	1.07616e-31	ENSG00000179295	CA-T.A	4.00935e-08	ENSG00000133703	CT-A.C	4.40513e-40	ENSG00000254221	CT-G.G	7.85447e-148	ENSG00000255408	CT-T.G	1.1179e-57	ENSG00000204967	CT-G.G	2.96246e-193	ENSG00000066032	CA-T.T	4.26471e-255	ENSG00000144331	CT-T.A
ENSG00000183117	CT-G.G	2.1213e-53	ENSG00000188107	CT-A.G	1.43546e-99	ENSG00000162825	CG-A.A	1.22477e-59	ENSG00000169894	TG-G.G	9.43174e-28	ENSG00000155093	CT-C.G	7.99897e-10	ENSG00000155657	CT-C.G	1.51269e-17	ENSG00000134086	TC-C.G	0.000895338	ENSG00000157764	CT-T.T	7.22736e-10	ENSG00000145113	TC-A.G	1.01081e-19	ENSG00000213281	CT-A.C	1.0175e-28	ENSG00000179295	CT-G.C	4.00935e-08	ENSG00000133703	CA-A.C	1.7199e-34	ENSG00000262576	CT-G.G	4.15061e-143	ENSG00000039139	CT-T.C	1.21308e-57	ENSG00000204965	CT-G.G	6.00452e-185	ENSG00000066032	CT-T.T	3.15984e-246	ENSG00000112964	CT-T.A
ENSG00000174469	CT-A.G	9.2255e-50	ENSG00000175497	CT-A.G	1.94012e-94	ENSG00000163386	TC-A.G	1.22477e-59	ENSG00000228273	TG-G.G	9.43174e-28	ENSG00000034152	CT-A.A	1.61493e-09	ENSG00000155657	CA-A.A	2.36964e-16	ENSG00000134086	CT-C.A	0.00288527	ENSG00000157764	TC-A.C	7.22736e-10	ENSG00000145113	TC-G.C	1.72064e-15	ENSG00000213281	CA-A.A	5.99835e-28	ENSG00000167754	CA-A.T	1.19968e-05	ENSG00000141510	CA-T.C	5.26374e-32	ENSG00000253910	CT-G.G	5.72082e-139	ENSG00000204969	CT-T.G	1.78695e-57	ENSG00000081842	CT-G.G	1.31386e-182	ENSG00000078328	CT-T.A	9.88287e-242	ENSG00000132874	CT-T.A
ENSG00000181234	CT-A.G	6.94336e-47	ENSG00000153707	CT-A.G	2.78108e-91	ENSG00000162825	CG-T.T	2.20531e-57	ENSG00000169894	CA-G.C	5.78213e-25	ENSG00000162366	CT-C.C	1.61493e-09	ENSG00000155657	CG-A.T	7.52028e-16	ENSG00000134086	CT-G.A	0.00288527	ENSG00000157764	CG-T.C	8.13909e-07	ENSG00000145113	CG-G.G	1.78616e-15	ENSG00000009307	CA-A.C	3.37253e-09	ENSG00000196866	CA-A.T	1.19968e-05	ENSG00000141510	TC-A.G	2.61744e-31	ENSG00000253485	CT-G.G	2.32401e-138	ENSG00000204970	CT-T.C	6.12671e-57	ENSG00000204969	CT-A.G	3.14748e-178	ENSG00000066032	CT-T.A	1.67873e-232	ENSG00000101746	CT-T.T
ENSG00000130226	CT-A.G	3.35518e-44	ENSG00000183117	CT-G.G	3.65523e-90	ENSG00000203832	CT-A.G	2.20531e-57	ENSG00000228273	CA-G.C	5.78213e-25	ENSG00000198947	CT-A.G	7.5682e-09	ENSG00000155657	CG-T.A	5.84375e-15	ENSG00000134086	CT-G.T	0.00288527	ENSG00000169676	CT-C.G	8.13909e-07	ENSG00000145113	CT-T.A	1.43355e-13	ENSG00000213281	CA-A.C	1.67626e-08	ENSG00000197409	CA-A.T	1.19968e-05	ENSG00000141510	CT-A.G	1.14065e-29	ENSG00000262209	CT-G.G	7.31506e-132	ENSG00000204970	CT-G.G	4.6539e-56	ENSG00000255408	CT-A.G	3.14748e-178	ENSG00000078328	CT-T.T	3.91555e-228	ENSG00000101746	CT-T.C
ENSG00000185565	CT-A.G	5.08383e-43	ENSG00000168702	CT-A.G	2.26173e-88	ENSG00000186275	TC-A.G	2.20531e-57	ENSG00000184956	CG-T.A	3.37621e-22	ENSG00000092067	CT-C.T	9.34372e-08	ENSG00000155657	CT-T.G	1.86386e-14	ENSG00000134086	CA-T.T	0.00929621	ENSG00000196156	TA-C.G	8.13909e-07	ENSG00000145113	CG-G.A	5.27592e-13	ENSG00000009307	CG-C.A	4.99894e-08	ENSG00000197846	CA-A.T	1.19968e-05	ENSG00000141510	CT-T.G	4.83287e-24	ENSG00000253731	CT-G.G	1.43539e-126	ENSG00000204969	CT-T.C	2.96977e-55	ENSG00000204970	CT-A.G	2.0146e-177	ENSG00000078328	CA-C.A	2.69871e-215	ENSG00000139304	CT-T.A
ENSG00000183117	CT-A.A	5.3604e-43	ENSG00000188107	CT-G.G	6.53217e-87	ENSG00000163386	CG-A.A	3.91363e-55	ENSG00000184956	CT-A.C	3.37621e-22	ENSG00000196126	CT-A.A	1.36308e-06	ENSG00000155657	CT-A.A	4.31353e-14	ENSG00000134086	TC-C.C	0.00929621	ENSG00000157764	TC-T.C	2.7205e-05	ENSG00000062485	TG-G.A	5.27592e-13	ENSG00000213281	CG-C.A	1.1595e-07	ENSG00000179295	CA-C.C	1.19968e-05	ENSG00000133703	CG-C.A	1.12642e-23	ENSG00000253537	CT-G.G	5.79188e-101	ENSG00000255408	CT-T.C	2.96977e-55	ENSG00000204967	CT-A.G	4.37131e-175	ENSG00000078328	CA-C.T	4.86702e-207	ENSG00000132256	CT-T.C
ENSG00000198626	CT-A.G	3.83857e-42	ENSG00000174473	CT-A.G	1.02004e-80	ENSG00000186275	CG-T.T	6.84662e-53	ENSG00000184956	TC-C.C	3.37621e-22	ENSG00000168702	TC-G.T	2.5713e-06	ENSG00000168036	CG-T.T	1.35611e-13	ENSG00000259243	TC-C.A	0.0129778	ENSG00000169676	TG-G.C	2.7205e-05	ENSG00000135469	TG-G.A	5.27592e-13	ENSG00000009307	CG-A.C	5.93195e-05	ENSG00000179295	CA-G.A	1.19968e-05	ENSG00000141510	CT-G.A	7.09976e-22	ENSG00000253953	CT-G.G	5.79188e-101	ENSG00000155657	CT-T.A	3.5161e-55	ENSG00000204963	CT-G.G	8.97359e-169	ENSG00000078328	CT-C.T	2.55443e-205	ENSG00000132874	CT-T.C
ENSG00000146555	CT-A.G	1.33915e-40	ENSG00000179242	CT-A.G	1.90905e-80	ENSG00000162825	TC-A.T	6.84662e-53	ENSG00000184956	TG-G.G	3.37621e-22	ENSG00000157778	CA-G.C	5.38119e-06	ENSG00000155657	CA-C.A	3.22964e-13	ENSG00000134086	CA-A.C	0.0299466	ENSG00000157764	CA-A.T	0.000906931	ENSG00000145113	TG-G.G	1.56405e-12	ENSG00000213281	CG-A.C	5.93195e-05	ENSG00000010310	CA-G.C	1.19968e-05	ENSG00000141510	CT-A.A	1.36865e-18	ENSG00000204956	CT-A.G	1.3584e-89	ENSG00000181143	CT-T.T	7.64017e-55	ENSG00000081842	CT-A.G	7.242e-168	ENSG00000021645	CA-T.T	6.91072e-205	ENSG00000144331	CT-T.C
ENSG00000186153	CT-A.G	1.33915e-40	ENSG00000130226	CT-G.G	2.93899e-79	ENSG00000162825	TC-T.T	6.84662e-53	ENSG00000100285	TA-G.G	6.7537e-18	ENSG00000126733	CA-T.A	5.38119e-06	ENSG00000155657	CT-G.G	4.7339e-13	ENSG00000134086	CA-C.A	0.0299466	ENSG00000157764	CA-C.T	0.000906931	ENSG00000145113	TC-G.G	5.05548e-12	ENSG00000142675	CG-T.T	5.93195e-05	ENSG00000249115	CG-A.G	1.19968e-05	ENSG00000141510	CT-G.C	3.62374e-17	ENSG00000081853	CT-A.G	4.60693e-89	ENSG00000204956	CT-T.C	2.45874e-54	ENSG00000204965	CT-A.G	2.07095e-166	ENSG00000021645	CT-T.A	5.20456e-200	ENSG00000132256	CT-T.A
ENSG00000185053	CT-A.G	1.67259e-38	ENSG00000145934	CT-A.G	2.11485e-77	ENSG00000186275	TC-G.G	1.18099e-50	ENSG00000184956	CG-G.A	1.00348e-16	ENSG00000250349	CT-G.C	5.38119e-06	ENSG00000155657	TC-A.C	8.47505e-11	ENSG00000134086	CA-T.A	0.0299466	ENSG00000157764	CA-T.C	0.000906931	ENSG00000145113	CA-C.C	1.31156e-10	ENSG00000163286	CT-A.G	5.93195e-05	ENSG00000162913	CG-A.T	1.19968e-05	ENSG00000141510	CT-T.C	4.42241e-17	ENSG00000254245	CT-A.G	4.60693e-89	ENSG00000255408	CT-G.G	3.56075e-54	ENSG00000204963	CT-A.G	7.12226e-157	ENSG00000021645	TC-C.T	1.37459e-199	ENSG00000112964	CT-T.C
ENSG00000179242	CT-A.G	5.34625e-37	ENSG00000175497	CT-G.G	5.38711e-77	ENSG00000163386	CT-A.A	2.009e-48	ENSG00000184185	CG-G.G	1.00348e-16	ENSG00000169093	CT-G.G	5.38119e-06	ENSG00000155657	CG-C.T	1.54881e-10	ENSG00000134086	CG-T.T	0.0299466	ENSG00000157764	CG-T.A	0.000906931	ENSG00000145113	CG-T.T	1.31156e-10	ENSG00000164078	CT-A.G	5.93195e-05	ENSG00000092010	CG-C.C	1.19968e-05	ENSG00000141510	TC-G.A	9.61737e-17	ENSG00000253767	CT-G.G	1.26215e-86	ENSG00000204969	CT-G.G	7.26681e-54	ENSG00000204962	CT-G.G	6.3632e-140	ENSG00000066032	TC-C.T	1.9638e-198	ENSG00000145075	CT-T.A
ENSG00000174469	CT-G.G	4.82827e-36	ENSG00000183117	CT-C.G	5.83989e-77	ENSG00000162825	TC-G.T	2.009e-48	ENSG00000184956	CG-G.T	1.00348e-16	ENSG00000126733	TA-T.T	5.38119e-06	ENSG00000181143	CA-G.A	1.22592e-09	ENSG00000134086	CT-A.A	0.0299466	ENSG00000157764	CG-T.T	0.000906931	ENSG00000145113	CT-C.G	1.31156e-10	ENSG00000186393	CT-A.G	5.93195e-05	ENSG00000100908	CG-C.C	1.19968e-05	ENSG00000141510	TC-A.A	2.03107e-16	ENSG00000254221	CT-A.G	2.38005e-86	ENSG00000204967	CT-G.G	1.03949e-53	ENSG00000204962	CT-A.G	8.58374e-137	ENSG00000066032	TG-C.T	1.70859e-194	ENSG00000111700	CT-T.T
ENSG00000182771	CT-A.G	1.39368e-35	ENSG00000185053	CT-A.G	1.21551e-76	ENSG00000145113	CT-G.A	3.50372e-48	ENSG00000184956	CT-C.A	1.00348e-16	ENSG00000250349	TC-A.T	5.38119e-06	ENSG00000155657	TC-A.G	3.68835e-09	ENSG00000178809	CT-A.G	0.0299466	ENSG00000232941	CT-A.A	0.000906931	ENSG00000145113	CT-C.A	2.35496e-09	ENSG00000213281	CT-A.G	5.93195e-05	ENSG00000139914	CG-C.C	1.19968e-05	ENSG00000141510	CT-A.C	4.42782e-16	ENSG00000262576	CT-A.G	1.08292e-81	ENSG00000204967	CT-T.G	2.24939e-53	ENSG00000204961	CT-G.G	3.02628e-134	ENSG00000066032	CT-A.G	2.1934e-194	ENSG00000122420	CT-T.C
ENSG00000183166	CT-A.G	1.39368e-35	ENSG00000164796	CT-A.G	9.52169e-73	ENSG00000203832	CG-T.T	3.371e-46	ENSG00000183020	CT-T.G	1.00348e-16	ENSG00000250349	TC-C.A	5.38119e-06	ENSG00000155657	CT-A.T	5.23277e-09	ENSG00000164897	CT-C.G	0.0299466	ENSG00000157764	CT-A.C	0.000906931	ENSG00000145113	CT-T.C	5.4802e-09	ENSG00000213281	CT-G.G	5.93195e-05	ENSG00000259371	CG-C.C	1.19968e-05	ENSG00000141510	CT-C.C	1.88541e-14	ENSG00000253485	CT-A.G	3.50262e-81	ENSG00000204956	CT-T.G	3.36448e-52	ENSG00000204961	CT-A.G	3.30909e-130	ENSG00000078328	CA-G.A	1.46194e-191	ENSG00000118997	CT-T.C
ENSG00000183166	CT-G.G	1.39368e-35	ENSG00000174469	CT-G.G	4.20361e-72	ENSG00000162825	CT-A.A	3.371e-46	ENSG00000184956	CT-T.G	1.00348e-16	ENSG00000181029	TG-G.C	5.38119e-06	ENSG00000155657	CA-T.T	5.59646e-09	ENSG00000134086	TA-G.C	0.0299466	ENSG00000157764	CT-A.T	0.000906931	ENSG00000145113	CA-T.A	4.61006e-08	ENSG00000009307	CT-G.G	0.000177059	ENSG00000103253	CG-G.C	1.19968e-05	ENSG00000141510	CT-T.A	5.63117e-14	ENSG00000253910	CT-A.G	3.50262e-81	ENSG00000081853	CT-T.C	2.1392e-51	ENSG00000250120	CT-G.G	2.77555e-105	ENSG00000078328	CA-A.A	2.20635e-191	ENSG00000139970	CT-T.C
ENSG00000198947	CT-A.G	1.96106e-35	ENSG00000149972	CT-A.G	2.28631e-71	ENSG00000163386	TG-T.G	3.371e-46	ENSG00000111215	CG-T.A	5.12819e-14	ENSG00000183019	TG-G.C	5.38119e-06	ENSG00000155657	TC-G.A	9.80826e-09	ENSG00000134086	TA-G.T	0.0299466	ENSG00000234298	CT-C.T	0.000906931	ENSG00000198788	CG-G.G	4.61006e-08	ENSG00000009307	CT-A.G	0.00035233	ENSG00000103254	CG-G.C	1.19968e-05	ENSG00000141510	CA-A.C	2.20383e-13	ENSG00000262209	CT-A.G	1.10906e-80	ENSG00000254245	CT-T.C	2.1392e-51	ENSG00000250120	CT-A.G	1.97336e-96	ENSG00000080224	CT-T.A	1.21126e-190	ENSG00000111700	CT-T.C
ENSG00000174469	CT-C.G	1.36637e-34	ENSG00000150672	CT-A.G	2.08287e-70	ENSG00000163386	TC-T.T	5.58037e-44	ENSG00000168300	CT-A.G	5.12819e-14	ENSG00000269711	TG-G.C	5.38119e-06	ENSG00000155657	CT-T.C	1.05745e-08	ENSG00000134086	TA-T.C	0.0299466	ENSG00000215454	CT-G.C	0.000906931	ENSG00000145113	CT-G.C	4.61006e-08	ENSG00000116176	CT-G.C	0.00035233	ENSG00000103260	CG-G.C	1.19968e-05	ENSG00000141510	CA-G.A	7.01193e-13	ENSG00000253731	CT-A.G	4.97049e-76	ENSG00000196565	CT-T.C	3.63141e-50	ENSG00000204970	CT-C.G	4.43966e-83	ENSG00000078328	CT-T.C	4.16206e-189	ENSG00000132874	CT-T.T
ENSG00000181234	CT-G.G	2.49457e-34	ENSG00000185008	CT-G.G	6.97035e-69	ENSG00000145113	CT-G.G	6.70711e-43	ENSG00000232941	CT-A.G	5.12819e-14	ENSG00000155093	CT-A.G	3.07085e-05	ENSG00000155657	CA-T.A	2.43748e-08	ENSG00000134086	TC-C.A	0.0299466	ENSG00000157764	CT-T.A	0.000906931	ENSG00000137747	TC-C.G	4.61006e-08	ENSG00000244414	CG-T.A	0.000584252	ENSG00000162004	CG-G.C	1.19968e-05	ENSG00000141510	CA-A.A	9.67951e-13	ENSG00000204956	CT-C.G	4.51892e-68	ENSG00000262576	CT-G.G	2.15789e-49	ENSG00000204969	CT-C.G	1.81615e-82	ENSG00000066032	CA-A.A	1.90565e-188	ENSG00000140873	CT-T.A
ENSG00000185737	CT-A.G	2.6805e-34	ENSG00000183715	CT-A.G	9.08954e-68	ENSG00000203832	CG-A.A	9.11534e-42	ENSG00000185958	CT-C.C	5.12819e-14	ENSG00000185565	CT-C.T	3.32507e-05	ENSG00000181143	CT-T.A	4.43785e-08	ENSG00000181625	TC-C.T	0.0299466	ENSG00000115661	CT-T.G	0.000906931	ENSG00000145113	TC-T.T	4.61006e-08	ENSG00000128276	CT-G.G	0.000584252	ENSG00000089737	CG-T.C	1.19968e-05	ENSG00000138413	CT-T.G	2.37915e-11	ENSG00000081853	CT-C.G	5.63313e-68	ENSG00000204967	CT-T.C	5.8643e-49	ENSG00000255408	CT-C.G	1.81615e-82	ENSG00000066032	CA-C.T	2.70612e-187	ENSG00000137473	CT-T.C
ENSG00000151952	CT-A.G	1.60344e-32	ENSG00000140945	CT-A.G	1.01597e-67	ENSG00000186275	TC-C.T	9.11534e-42	ENSG00000111215	TC-A.C	5.12819e-14	ENSG00000155093	TC-G.G	3.47829e-05	ENSG00000181143	CT-T.C	5.42618e-08	ENSG00000213648	TC-C.T	0.0299466	ENSG00000157764	TA-A.T	0.000906931	ENSG00000110876	TG-G.G	4.61006e-08	ENSG00000009307	TA-T.G	0.00121458	ENSG00000092094	CT-A.C	1.19968e-05	ENSG00000141510	TC-C.G	2.8174e-11	ENSG00000254245	CT-C.G	5.63313e-68	ENSG00000254221	CT-G.G	6.61769e-49	ENSG00000204967	CT-C.G	2.71261e-80	ENSG00000021645	CT-A.G	3.43071e-187	ENSG00000089250	CT-T.C
ENSG00000130226	CT-G.G	2.33175e-32	ENSG00000153707	CT-G.G	1.01597e-67	ENSG00000186275	TC-T.A	9.11534e-42	ENSG00000212127	TC-A.C	5.12819e-14	ENSG00000183098	CA-A.A	5.57544e-05	ENSG00000198925	CT-A.G	7.25184e-08	ENSG00000258150	TC-C.T	0.0299466	ENSG00000157764	TA-T.A	0.000906931	ENSG00000145113	TC-C.C	1.10169e-07	ENSG00000213281	TA-T.G	0.00161129	ENSG00000100823	CT-A.C	1.19968e-05	ENSG00000141510	CT-C.A	2.19502e-10	ENSG00000261934	CT-G.G	2.54029e-67	ENSG00000081853	CT-G.G	1.50776e-48	ENSG00000204965	CT-C.G	3.06789e-79	ENSG00000078328	CT-C.G	4.23707e-186	ENSG00000128739	CT-T.C
ENSG00000175497	CT-A.G	2.50093e-32	ENSG00000152208	CT-A.G	1.3303e-66	ENSG00000203832	TC-T.T	9.11534e-42	ENSG00000184956	TC-C.G	5.12819e-14	ENSG00000168702	TA-A.A	5.57544e-05	ENSG00000168036	TC-G.A	7.25184e-08	ENSG00000134086	TG-G.C	0.0299466	ENSG00000157764	TA-T.T	0.000906931	ENSG00000145113	CT-C.T	2.092e-07	ENSG00000100285	TA-G.G	0.00206122	ENSG00000165782	CT-A.C	1.19968e-05	ENSG00000141510	TG-C.T	2.01542e-09	ENSG00000254221	CT-C.G	6.0949e-63	ENSG00000254245	CT-G.G	1.50776e-48	ENSG00000249158	CT-A.G	1.13018e-77	ENSG00000066032	TC-A.A	9.24646e-186	ENSG00000133107	CT-T.C
ENSG00000152208	CT-A.G	4.16474e-32	ENSG00000182667	CT-A.G	1.7476e-66	ENSG00000203832	CT-A.A	2.3384e-37	ENSG00000067842	TC-G.C	5.12819e-14	ENSG00000155093	CT-G.G	8.17298e-05	ENSG00000155657	CT-C.A	1.1224e-07	ENSG00000169246	TG-G.G	0.0299466	ENSG00000157764	TC-A.A	0.000906931	ENSG00000169876	CT-T.A	5.8771e-07	ENSG00000156413	CA-A.A	0.00774246	ENSG00000179295	CT-A.C	1.19968e-05	ENSG00000141510	CA-T.A	1.14908e-08	ENSG00000253910	CT-C.G	7.40139e-63	ENSG00000253910	CT-G.G	1.5122e-48	ENSG00000081842	CT-C.G	4.02351e-77	ENSG00000078328	TG-C.T	1.0465e-185	ENSG00000144681	CT-T.A
ENSG00000150275	CT-A.G	1.02175e-30	ENSG00000150275	CA-A.A	3.33231e-66	ENSG00000219481	CT-A.G	3.67368e-35	ENSG00000156858	TC-G.C	5.12819e-14	ENSG00000183117	CT-A.G	9.66832e-05	ENSG00000155657	CA-C.C	1.15432e-07	ENSG00000205281	CG-C.G	0.03494	ENSG00000157764	TG-C.T	0.000906931	ENSG00000145113	TA-G.C	9.14927e-07	ENSG00000186468	CA-A.A	0.00774246	ENSG00000221843	CT-A.C	1.19968e-05	ENSG00000141510	CA-G.C	1.24634e-08	ENSG00000262576	CT-C.G	2.42335e-62	ENSG00000039139	CT-T.A	2.64661e-48	ENSG00000251664	CT-A.G	8.40318e-73	ENSG00000021645	CT-T.T	1.48969e-183	ENSG00000112964	CT-T.T
ENSG00000146555	CT-C.G	1.41873e-30	ENSG00000130226	CT-A.G	3.3799e-65	ENSG00000186275	CT-G.A	3.67368e-35	ENSG00000157764	TA-G.G	1.45931e-13	ENSG00000196126	CT-C.A	0.000103477	ENSG00000155657	TA-A.G	1.40351e-07	ENSG00000197172	CT-A.G	0.03494	ENSG00000259243	CG-T.T	0.00136052	ENSG00000149531	CT-A.G	3.81318e-06	ENSG00000196119	CA-A.C	0.00774246	ENSG00000004939	CT-A.G	1.19968e-05	ENSG00000141510	CA-A.G	1.63207e-08	ENSG00000121879	CT-T.A	6.05341e-61	ENSG00000204956	CT-G.G	3.38736e-48	ENSG00000249158	CT-G.G	2.98251e-71	ENSG00000078328	CT-A.A	2.41407e-180	ENSG00000132256	CT-T.T
ENSG00000179399	CT-A.G	2.81004e-30	ENSG00000185774	CT-A.G	3.51914e-65	ENSG00000174501	TC-A.T	3.67368e-35	ENSG00000156860	TC-G.C	3.0719e-13	ENSG00000198947	CT-A.A	0.000113949	ENSG00000155657	TG-G.T	1.92873e-07	ENSG00000134086	CA-A.T	0.0964518	ENSG00000109536	TC-T.C	0.00266638	ENSG00000145113	TC-C.T	3.81318e-06	ENSG00000236104	CA-A.C	0.00774246	ENSG00000163114	CT-A.G	1.19968e-05	ENSG00000138413	CG-T.G	3.69332e-08	ENSG00000253537	CT-A.G	1.13959e-60	ENSG00000181143	CT-T.A	7.06998e-48	ENSG00000204963	CT-C.G	4.16556e-70	ENSG00000066032	CA-C.A	2.99177e-180	ENSG00000122420	CT-T.A
ENSG00000182901	CT-A.G	2.81004e-30	ENSG00000185565	CT-A.G	4.80527e-65	ENSG00000149531	TC-T.C	3.67368e-35	ENSG00000204983	CT-G.T	1.07341e-12	ENSG00000172264	CT-A.G	0.000137054	ENSG00000155657	TG-C.C	2.05157e-07	ENSG00000164897	CA-G.C	0.0964518	ENSG00000109536	TC-A.T	0.0225127	ENSG00000137747	CG-G.C	1.31526e-05	ENSG00000212734	CA-A.T	0.00774246	ENSG00000214921	CT-A.G	1.19968e-05	ENSG00000224854	CT-C.G	3.69332e-08	ENSG00000253953	CT-A.G	1.13959e-60	ENSG00000253485	CT-G.G	2.4679e-47	ENSG00000251664	CT-G.G	3.05284e-63	ENSG00000066032	CT-T.C	3.2349e-180	ENSG00000104043	CT-T.C
ENSG00000183117	CT-C.G	6.24384e-30	ENSG00000175161	CT-A.G	1.07775e-64	ENSG00000163386	TG-A.T	3.67368e-35	ENSG00000110931	CA-A.A	2.5161e-11	ENSG00000169306	CA-C.A	0.000143959	ENSG00000155657	CT-G.T	2.08217e-07	ENSG00000228537	CA-T.A	0.0964518	ENSG00000109536	TA-A.T	0.0283748	ENSG00000145113	CG-G.T	1.31526e-05	ENSG00000213888	CA-C.A	0.00774246	ENSG00000186510	CT-C.C	1.19968e-05	ENSG00000141510	CG-G.C	4.75312e-08	ENSG00000253485	CT-C.G	4.79279e-60	ENSG00000186472	CT-T.C	1.91762e-46	ENSG00000204969	CT-T.G	1.5328e-61	ENSG00000078328	TC-A.A	4.24907e-179	ENSG00000140873	CT-T.C
ENSG00000185345	CT-A.G	1.02426e-29	ENSG00000151952	CT-A.G	2.45427e-64	ENSG00000135976	CT-A.A	5.69885e-33	ENSG00000184956	CG-G.C	2.5161e-11	ENSG00000188107	TA-A.C	0.00016065	ENSG00000155657	TC-A.A	2.08217e-07	ENSG00000134086	CA-T.C	0.0964518	ENSG00000109536	CA-A.A	0.0301548	ENSG00000075673	CG-T.T	1.31526e-05	ENSG00000109917	CA-C.C	0.00774246	ENSG00000211450	CT-C.C	1.19968e-05	ENSG00000141510	TA-A.G	5.37537e-08	ENSG00000253305	CT-G.G	7.11545e-59	ENSG00000155657	CT-T.G	6.08904e-45	ENSG00000204967	CT-T.G	1.02034e-60	ENSG00000066032	TG-T.T	1.7004e-176	ENSG00000128739	CT-T.A
ENSG00000188107	CT-A.G	1.39772e-29	ENSG00000183117	CT-T.G	1.58258e-63	ENSG00000149531	CT-A.T	5.69885e-33	ENSG00000129757	CG-G.G	2.5161e-11	ENSG00000169306	CA-C.T	0.000185668	ENSG00000155657	CA-T.C	2.72682e-07	ENSG00000134086	CG-A.C	0.0964518	ENSG00000157764	CA-A.A	0.0301548	ENSG00000112473	CG-T.T	1.31526e-05	ENSG00000110243	CA-C.C	0.00774246	ENSG00000213593	CT-C.C	1.19968e-05	ENSG00000141510	CT-A.T	8.03905e-08	ENSG00000253767	CT-A.G	2.30295e-57	ENSG00000081853	CT-T.G	6.8545e-45	ENSG00000255408	CT-T.G	1.52281e-60	ENSG00000066032	CA-T.A	5.24799e-176	ENSG00000137473	CT-T.A
ENSG00000185008	CT-A.G	1.64226e-29	ENSG00000183117	CA-T.T	1.61924e-63	ENSG00000186275	CT-C.G	5.69885e-33	ENSG00000254827	CG-G.G	2.5161e-11	ENSG00000183230	TA-T.T	0.000185668	ENSG00000155657	CG-A.C	4.92943e-07	ENSG00000134086	CG-C.G	0.0964518	ENSG00000129226	CA-A.C	0.0301548	ENSG00000150991	CG-T.T	1.31526e-05	ENSG00000179918	CA-C.C	0.00774246	ENSG00000233436	CT-C.C	1.19968e-05	ENSG00000141510	CT-C.T	1.64601e-07	ENSG00000262209	CT-C.G	1.31868e-56	ENSG00000254245	CT-T.G	6.8545e-45	ENSG00000204970	CT-T.G	2.77606e-60	ENSG00000078328	TC-C.T	6.3731e-176	ENSG00000139767	CT-T.C
ENSG00000140945	CT-A.G	1.74821e-29	ENSG00000183715	CT-G.G	1.61924e-63	ENSG00000163386	CT-G.G	5.69885e-33	ENSG00000212127	CG-T.A	2.5161e-11	ENSG00000155093	TC-A.T	0.000185668	ENSG00000155657	CA-G.C	7.38718e-07	ENSG00000134086	CG-C.T	0.0964518	ENSG00000157764	CA-A.C	0.0301548	ENSG00000164889	CG-T.T	1.31526e-05	ENSG00000182890	CA-C.C	0.00774246	ENSG00000136449	CT-C.G	1.19968e-05	ENSG00000141510	CA-C.C	4.14618e-07	ENSG00000253846	CT-G.G	1.31868e-56	ENSG00000155657	CT-C.T	6.50604e-44	ENSG00000204962	CT-C.G	8.07854e-58	ENSG00000078328	CT-T.G	3.28077e-175	ENSG00000145075	CT-T.C
ENSG00000183166	CT-C.G	2.52547e-29	ENSG00000185532	CT-A.G	2.59795e-63	ENSG00000186275	CA-A.A	8.73064e-31	ENSG00000255374	CG-T.A	2.5161e-11	ENSG00000175497	CA-A.T	0.000231162	ENSG00000143631	CT-C.G	1.09578e-06	ENSG00000224659	CG-G.C	0.0964518	ENSG00000161960	CA-A.C	0.0301548	ENSG00000204231	CG-T.T	1.31526e-05	ENSG00000009307	CA-C.T	0.00774246	ENSG00000213865	CT-C.G	1.19968e-05	ENSG00000141510	CG-C.T	8.50439e-07	ENSG00000253731	CT-C.G	6.39816e-55	ENSG00000081842	CT-G.G	1.26468e-43	ENSG00000081842	CT-T.G	3.29009e-57	ENSG00000078328	CA-T.A	2.82344e-174	ENSG00000080910	CT-T.C
ENSG00000182771	CT-G.G	2.52547e-29	ENSG00000176571	CT-A.G	1.04032e-62	ENSG00000163386	CG-T.C	8.73064e-31	ENSG00000111215	CG-T.T	2.5161e-11	ENSG00000183230	TC-C.C	0.000235438	ENSG00000155657	CA-C.T	1.46367e-06	ENSG00000229665	CG-T.T	0.0964518	ENSG00000165370	CA-A.C	0.0301548	ENSG00000147050	CT-A.T	1.31526e-05	ENSG00000177688	CA-C.T	0.00774246	ENSG00000111077	CT-G.A	1.19968e-05	ENSG00000141510	CG-T.T	8.50439e-07	ENSG00000081853	CT-T.G	5.98669e-50	ENSG00000204965	CT-G.G	1.97243e-43	ENSG00000204965	CT-T.G	9.00818e-57	ENSG00000021645	TG-C.T	1.72838e-171	ENSG00000122507	CT-T.C
ENSG00000155093	CT-C.G	4.24113e-29	ENSG00000183230	CT-A.G	1.94739e-62	ENSG00000186275	CT-A.G	8.73064e-31	ENSG00000212127	CG-T.T	2.5161e-11	ENSG00000185008	CG-A.A	0.000256317	ENSG00000155657	TC-C.T	1.5328e-06	ENSG00000134086	CT-A.C	0.0964518	ENSG00000184867	CA-A.C	0.0301548	ENSG00000100121	CT-C.G	1.31526e-05	ENSG00000182890	CA-C.T	0.00774246	ENSG00000117215	CT-G.A	1.19968e-05	ENSG00000141510	CA-T.T	1.03677e-06	ENSG00000254245	CT-T.G	5.98669e-50	ENSG00000204970	CT-A.G	7.32157e-43	ENSG00000204963	CT-T.G	1.39748e-54	ENSG00000078328	CA-C.C	3.57148e-170	ENSG00000135333	CT-T.A
ENSG00000164796	CT-A.G	8.72701e-29	ENSG00000150275	CT-G.G	2.81041e-61	ENSG00000188280	CT-A.G	8.73064e-31	ENSG00000189339	CT-A.G	2.5161e-11	ENSG00000196126	CT-G.A	0.00028226	ENSG00000181143	CT-C.T	1.81395e-06	ENSG00000134086	CT-C.C	0.0964518	ENSG00000157764	CA-C.A	0.0301548	ENSG00000172236	CT-G.A	1.31526e-05	ENSG00000188529	CA-C.T	0.00774246	ENSG00000167778	CT-G.A	1.19968e-05	ENSG00000141510	TC-T.G	1.14865e-06	ENSG00000253537	CT-C.G	7.06583e-50	ENSG00000213931	CT-T.C	9.89329e-43	ENSG00000204961	CT-C.G	4.82202e-53	ENSG00000066032	CT-A.A	1.57726e-169	ENSG00000139970	CT-T.A
ENSG00000150672	CT-A.G	3.04513e-28	ENSG00000153707	CA-T.T	3.41904e-60	ENSG00000163386	CT-A.T	8.73064e-31	ENSG00000227124	CT-A.G	2.5161e-11	ENSG00000196126	TC-T.G	0.00028226	ENSG00000183791	CA-C.C	1.95068e-06	ENSG00000166160	CT-G.G	0.0964518	ENSG00000257115	CA-C.A	0.0301548	ENSG00000176945	CT-G.C	1.31526e-05	ENSG00000004975	CA-G.A	0.00774246	ENSG00000173276	CT-G.A	1.19968e-05	ENSG00000141510	TG-C.G	1.14865e-06	ENSG00000253953	CT-C.G	7.06583e-50	ENSG00000257335	CT-T.C	9.89329e-43	ENSG00000204962	CT-T.G	1.34292e-47	ENSG00000078328	CG-T.T	2.21933e-168	ENSG00000135333	CT-T.C
ENSG00000183117	CT-C.T	6.6795e-28	ENSG00000188107	CA-T.T	5.02494e-59	ENSG00000219481	CT-G.A	8.73064e-31	ENSG00000183020	CT-C.A	2.5161e-11	ENSG00000250349	CA-A.T	0.000308488	ENSG00000206181	CA-C.C	1.95068e-06	ENSG00000129194	CT-T.A	0.0964518	ENSG00000157764	CA-C.G	0.0301548	ENSG00000103343	CT-T.A	1.31526e-05	ENSG00000100197	CA-G.A	0.00774246	ENSG00000162738	CT-G.G	1.19968e-05	ENSG00000141510	TC-C.A	1.79363e-06	ENSG00000204956	CT-T.G	4.01595e-49	ENSG00000039139	CT-T.G	9.89329e-43	ENSG00000250120	CT-C.G	1.36741e-44	ENSG00000080224	TC-A.A	3.89395e-167	ENSG00000133107	CT-T.A
ENSG00000148948	CT-A.G	1.41033e-27	ENSG00000188107	CT-C.G	8.58015e-59	ENSG00000058453	CT-G.G	8.73064e-31	ENSG00000184956	CT-C.C	2.5161e-11	ENSG00000269496	CA-C.A	0.000308488	ENSG00000178096	CG-T.G	1.95068e-06	ENSG00000134086	CT-T.A	0.0964518	ENSG00000198841	CA-C.G	0.0301548	ENSG00000142178	CT-T.A	1.31526e-05	ENSG00000167721	CA-G.A	0.00774246	ENSG00000188124	CT-G.G	1.19968e-05	ENSG00000141510	CG-A.C	2.75812e-06	ENSG00000253767	CT-C.G	5.44193e-46	ENSG00000204963	CT-G.G	2.12432e-42	ENSG00000204961	CT-T.G	5.83862e-42	ENSG00000066032	CG-T.T	4.7872e-167	ENSG00000100095	CT-T.C
ENSG00000153707	CT-G.G	2.15666e-27	ENSG00000188107	CT-T.T	1.03845e-58	ENSG00000163386	CT-T.T	8.73064e-31	ENSG00000064666	CT-C.G	2.5161e-11	ENSG00000198502	CA-C.C	0.000308488	ENSG00000167978	CG-T.T	1.95068e-06	ENSG00000184674	CT-T.A	0.0964518	ENSG00000269094	CA-C.G	0.0301548	ENSG00000147050	CT-T.A	1.31526e-05	ENSG00000177465	CA-G.A	0.00774246	ENSG00000056736	CT-G.T	1.19968e-05	ENSG00000141510	TA-A.C	2.76676e-06	ENSG00000254122	CT-G.G	5.71798e-46	ENSG00000081842	CT-T.C	3.28613e-42	ENSG00000239389	CT-A.G	9.98755e-39	ENSG00000060709	CT-A.G	8.66051e-167	ENSG00000141431	CT-T.C
ENSG00000179242	CT-G.G	2.57976e-27	ENSG00000157168	CT-A.G	3.2107e-58	ENSG00000186275	TC-C.C	8.73064e-31	ENSG00000064687	CT-C.G	2.5161e-11	ENSG00000077721	CA-C.G	0.000308488	ENSG00000115657	CT-A.G	1.95068e-06	ENSG00000134086	CT-T.C	0.0964518	ENSG00000164086	CA-C.T	0.0301548	ENSG00000166261	CT-T.A	1.31526e-05	ENSG00000164078	CA-G.C	0.00774246	ENSG00000113812	CT-G.T	1.19968e-05	ENSG00000141510	CG-C.G	3.51714e-06	ENSG00000254221	CT-T.G	6.98489e-45	ENSG00000204965	CT-T.C	7.87698e-42	ENSG00000239389	CT-G.G	8.37644e-37	ENSG00000080224	CT-T.T	9.5426e-165	ENSG00000144681	CT-T.C
ENSG00000151952	CT-G.G	2.80061e-27	ENSG00000130226	CT-C.G	4.13834e-58	ENSG00000165269	CT-C.G	8.5717e-29	ENSG00000173432	CT-G.C	2.5161e-11	ENSG00000126733	CA-C.T	0.000308488	ENSG00000180921	CT-G.G	1.95068e-06	ENSG00000134086	CT-T.G	0.0964518	ENSG00000168481	CA-G.A	0.0301548	ENSG00000145113	CT-T.T	1.31526e-05	ENSG00000187713	CA-G.C	0.00774246	ENSG00000084110	CT-T.A	1.19968e-05	ENSG00000141510	CT-T.T	6.49155e-06	ENSG00000253910	CT-T.G	5.74819e-44	ENSG00000254221	CT-T.G	1.10607e-41	ENSG00000249158	CT-C.G	1.15447e-34	ENSG00000048052	CT-A.G	3.8681e-163	ENSG00000145431	CT-T.C
ENSG00000183715	CT-G.G	5.34482e-27	ENSG00000148948	CT-A.G	9.99447e-58	ENSG00000163386	CG-A.T	1.32113e-28	ENSG00000169894	CT-G.G	2.5161e-11	ENSG00000205730	CA-C.T	0.000308488	ENSG00000204305	CT-T.A	1.95068e-06	ENSG00000164897	CT-T.G	0.0964518	ENSG00000168484	CA-G.A	0.0301548	ENSG00000234745	CT-T.T	1.31526e-05	ENSG00000258973	CA-G.T	0.00774246	ENSG00000153914	CT-T.C	1.19968e-05	ENSG00000141510	TC-A.C	6.49155e-06	ENSG00000253485	CT-T.G	1.01586e-43	ENSG00000204970	CT-C.G	1.46864e-41	ENSG00000249034	CT-G.G	2.96123e-34	ENSG00000066032	TC-A.T	3.87869e-163	ENSG00000085563	CT-T.C
ENSG00000169862	CT-A.G	7.96965e-27	ENSG00000187391	CT-A.G	1.15035e-57	ENSG00000163386	CG-C.T	1.32113e-28	ENSG00000228273	CT-G.G	2.5161e-11	ENSG00000034152	CG-A.A	0.000308488	ENSG00000204308	CT-T.A	1.95068e-06	ENSG00000134086	TA-A.C	0.0964518	ENSG00000169676	CA-G.A	0.0301548	ENSG00000147050	TA-T.A	1.31526e-05	ENSG00000181733	CA-T.A	0.00774246	ENSG00000179295	CT-T.C	1.19968e-05	ENSG00000141510	CA-A.T	8.90372e-06	ENSG00000262576	CT-T.G	3.37269e-43	ENSG00000262576	CT-T.G	1.27987e-40	ENSG00000251664	CT-C.G	1.4797e-33	ENSG00000048052	CT-T.A	2.07499e-162	ENSG00000139304	CT-T.C
ENSG00000185352	CT-A.G	7.96965e-27	ENSG00000179242	CT-G.G	4.56092e-57	ENSG00000186275	CT-A.A	1.32113e-28	ENSG00000184956	TA-C.T	2.5161e-11	ENSG00000267157	CG-C.A	0.000308488	ENSG00000143374	CT-T.C	1.95068e-06	ENSG00000204172	TA-C.T	0.0964518	ENSG00000131650	CA-G.C	0.0301548	ENSG00000196963	TC-A.A	1.31526e-05	ENSG00000119403	CA-T.T	0.00774246	ENSG00000051009	CT-T.G	1.19968e-05	ENSG00000141510	TG-A.C	1.97608e-05	ENSG00000261934	CT-A.G	3.71126e-42	ENSG00000155657	CT-T.T	1.70737e-40	ENSG00000250120	CT-T.G	4.61032e-27	ENSG00000078328	CA-T.C	8.08021e-160	ENSG00000104043	CT-T.A
ENSG00000182771	CT-C.G	7.96965e-27	ENSG00000153707	CT-T.T	1.01386e-56	ENSG00000162825	CT-A.G	1.32113e-28	ENSG00000066427	TC-G.T	2.5161e-11	ENSG00000100300	CG-G.A	0.000308488	ENSG00000168036	CT-T.T	1.95068e-06	ENSG00000134086	TC-A.T	0.0964518	ENSG00000162073	CA-G.C	0.0301548	ENSG00000140323	TC-A.G	1.31526e-05	ENSG00000134363	CA-T.T	0.00774246	ENSG00000157330	CT-T.G	1.19968e-05	ENSG00000141510	TA-G.C	2.74475e-05	ENSG00000253873	CT-G.G	3.71126e-42	ENSG00000204965	CT-T.G	2.85513e-40	ENSG00000204970	CA-G.G	1.15528e-24	ENSG00000078328	TC-A.T	8.67684e-159	ENSG00000144339	CT-T.A
ENSG00000146555	CT-G.G	7.96965e-27	ENSG00000139915	CT-A.G	2.55206e-56	ENSG00000174501	CT-A.G	1.32113e-28	ENSG00000066427	TC-T.T	2.5161e-11	ENSG00000107937	CG-T.C	0.000308488	ENSG00000039650	TC-C.G	1.95068e-06	ENSG00000258130	TC-C.T	0.0964518	ENSG00000171425	CA-G.C	0.0301548	ENSG00000100031	TC-G.A	1.31526e-05	ENSG00000188694	CA-T.T	0.00774246	ENSG00000181617	CT-T.T	1.19968e-05	ENSG00000141510	TA-G.G	2.74475e-05	ENSG00000253305	CT-A.G	2.21535e-39	ENSG00000254221	CT-T.C	3.77344e-40	ENSG00000249158	CT-T.G	1.09034e-23	ENSG00000066032	CT-G.G	2.43612e-158	ENSG00000105784	CT-T.C
ENSG00000183230	CT-A.G	9.9284e-27	ENSG00000272781	CT-A.G	2.55206e-56	ENSG00000242384	CT-C.G	1.32113e-28	ENSG00000111215	TG-G.T	2.5161e-11	ENSG00000250349	CG-T.T	0.000308488	ENSG00000168036	TG-A.C	1.95068e-06	ENSG00000261052	TC-C.T	0.0964518	ENSG00000173581	CA-G.C	0.0301548	ENSG00000145113	TG-A.T	1.31526e-05	ENSG00000196119	CG-A.A	0.00774246	ENSG00000063244	TA-A.T	1.19968e-05	ENSG00000141510	TG-G.G	3.95973e-05	ENSG00000261934	CT-C.G	1.58653e-36	ENSG00000204969	CT-A.G	2.97942e-39	ENSG00000204967	CA-G.G	3.14233e-23	ENSG00000021645	CA-T.A	7.31087e-158	ENSG00000145863	CT-T.C
ENSG00000187323	CT-A.G	2.23616e-26	ENSG00000150275	CT-T.A	4.58844e-56	ENSG00000163386	CT-C.T	1.32113e-28	ENSG00000212127	TG-G.T	2.5161e-11	ENSG00000069509	CT-A.C	0.000308488	ENSG00000149115	TG-C.G	1.95068e-06	ENSG00000134086	TC-T.G	0.0964518	ENSG00000213015	CA-G.C	0.0301548	ENSG00000112852	TG-G.G	1.31526e-05	ENSG00000102128	CG-A.C	0.00774246	ENSG00000141258	TC-A.T	1.19968e-05	ENSG00000224854	CA-T.C	5.68914e-05	ENSG00000262209	CT-T.G	1.72293e-36	ENSG00000255408	CT-A.G	2.97942e-39	ENSG00000239389	CT-C.G	3.78495e-23	ENSG00000078328	CA-A.C	4.85976e-155	ENSG00000139910	CT-T.A
ENSG00000168702	CT-A.G	3.82482e-26	ENSG00000179603	CT-A.G	1.08806e-55	ENSG00000163386	CT-G.A	1.32113e-28	ENSG00000255374	TG-G.T	2.5161e-11	ENSG00000170955	CT-A.C	0.000308488	ENSG00000155657	TA-A.A	2.04915e-06	ENSG00000171116	TG-A.A	0.0964518	ENSG00000069696	CA-G.T	0.0301548	ENSG00000113205	TG-G.G	1.31526e-05	ENSG00000167721	CG-A.C	0.00774246	ENSG00000175548	TC-T.C	1.19968e-05	ENSG00000138413	CA-T.G	5.68914e-05	ENSG00000253846	CT-A.G	5.39018e-36	ENSG00000204963	CT-T.C	6.36809e-39	ENSG00000204969	CA-G.G	1.91269e-22	ENSG00000080224	CA-T.T	1.43982e-154	ENSG00000146151	CT-T.A
ENSG00000179242	CT-C.G	1.24674e-25	ENSG00000183117	CA-A.A	3.70522e-55	ENSG00000204983	TC-C.C	1.32113e-28	ENSG00000066427	TG-T.T	2.5161e-11	ENSG00000100450	CT-A.G	0.000308488	ENSG00000092054	CT-G.G	3.68526e-06	ENSG00000134086	TG-C.G	0.0964518	ENSG00000157764	CA-T.A	0.0301548	ENSG00000141736	TG-G.G	1.31526e-05	ENSG00000147955	CG-A.T	0.00774246	ENSG00000177201	TG-A.G	1.19968e-05	ENSG00000168612	CT-A.A	5.68914e-05	ENSG00000253731	CT-T.G	1.45746e-35	ENSG00000262576	CT-T.C	7.23563e-39	ENSG00000255408	CA-G.G	1.91269e-22	ENSG00000021645	CA-C.T	3.63328e-153	ENSG00000147606	CT-T.A
ENSG00000169862	CT-G.G	1.41285e-25	ENSG00000153707	CT-C.G	4.86574e-54	ENSG00000163386	TC-G.G	1.32113e-28	ENSG00000101307	CA-A.A	1.18711e-08	ENSG00000104848	CT-A.G	0.000308488	ENSG00000114270	CT-G.G	3.68526e-06	ENSG00000231850	TG-T.A	0.0964518	ENSG00000205176	CA-T.A	0.0301548	ENSG00000141741	TG-G.G	1.31526e-05	ENSG00000213930	CG-A.T	0.00774246	ENSG00000179295	TG-C.C	1.19968e-05	ENSG00000166188	CT-C.G	5.68914e-05	ENSG00000253305	CT-C.G	7.14653e-35	ENSG00000081842	CT-T.G	7.53618e-39	ENSG00000134982	CT-G.G	1.26138e-20	ENSG00000021645	CT-G.G	9.23194e-153	ENSG00000144339	CT-T.C
ENSG00000183117	CT-T.A	3.41052e-25	ENSG00000182667	CT-G.G	8.49209e-54	ENSG00000186275	TG-C.G	1.32113e-28	ENSG00000131127	CA-A.A	1.18711e-08	ENSG00000126733	CT-A.G	0.000308488	ENSG00000155657	CA-G.A	5.04264e-06	ENSG00000236249	TG-T.A	0.0964518	ENSG00000102393	CA-T.C	0.0301548	ENSG00000196963	TG-G.G	1.31526e-05	ENSG00000104827	CG-C.A	0.00774246	ENSG00000179295	TG-G.C	1.19968e-05	ENSG00000203392	CT-C.G	5.68914e-05	ENSG00000204956	CT-T.A	9.40307e-34	ENSG00000204963	CT-T.G	5.97664e-38	ENSG00000081842	CA-T.T	3.06908e-20	ENSG00000042781	CT-T.A	1.74163e-151	ENSG00000146151	CT-T.C
ENSG00000183117	CT-T.T	3.55973e-25	ENSG00000149972	CT-G.G	1.38927e-53	ENSG00000145113	TC-C.A	1.83823e-27	ENSG00000184956	CA-A.C	1.18711e-08	ENSG00000188076	CT-A.G	0.000308488	ENSG00000117983	CT-A.G	5.04264e-06	ENSG00000204172	TC-A.G	0.135249	ENSG00000173928	CA-T.C	0.0301548	ENSG00000145113	TG-T.A	1.31526e-05	ENSG00000156860	CG-C.A	0.00774246	ENSG00000116337	CA-C.A	0.00350448	ENSG00000175634	CT-G.G	5.68914e-05	ENSG00000081853	CT-T.A	4.21087e-32	ENSG00000204969	CT-C.G	9.13073e-38	ENSG00000204965	CA-T.T	3.06908e-20	ENSG00000078328	CT-C.C	2.07366e-151	ENSG00000122420	CT-T.T
ENSG00000150275	CT-T.T	4.96139e-25	ENSG00000185008	CT-C.G	1.39574e-53	ENSG00000109536	CT-A.A	2.60706e-27	ENSG00000184956	CA-A.T	1.18711e-08	ENSG00000198223	CT-A.G	0.000308488	ENSG00000120322	CT-C.G	5.04264e-06	ENSG00000197172	CT-C.G	0.229462	ENSG00000198841	CA-T.C	0.0301548	ENSG00000145113	CG-A.G	2.49682e-05	ENSG00000229314	CG-C.A	0.00774246	ENSG00000213903	CA-C.C	0.00350448	ENSG00000141510	TA-T.G	5.68914e-05	ENSG00000254245	CT-T.A	4.21087e-32	ENSG00000255408	CT-C.G	9.13073e-38	ENSG00000204967	CA-T.T	1.43722e-19	ENSG00000080224	CT-A.G	1.03758e-150	ENSG00000141431	CT-T.A
ENSG00000183117	CA-G.A	5.56984e-25	ENSG00000187323	CT-A.G	2.73344e-53	ENSG00000227140	CA-C.G	1.97493e-26	ENSG00000184956	CA-C.C	1.18711e-08	ENSG00000126733	CT-A.T	0.000308488	ENSG00000155657	TG-T.T	5.04264e-06	ENSG00000196622	CT-C.T	0.229462	ENSG00000257529	CA-T.C	0.0301548	ENSG00000145113	CA-A.C	3.93656e-05	ENSG00000233276	CG-C.G	0.00774246	ENSG00000272658	CA-C.C	0.00350448	ENSG00000141510	CA-T.G	7.32506e-05	ENSG00000253846	CT-C.G	1.58894e-31	ENSG00000253910	CT-T.G	1.12202e-37	ENSG00000204969	CA-T.T	1.43722e-19	ENSG00000066032	CA-A.T	1.96764e-150	ENSG00000147606	CT-T.C
ENSG00000147481	CT-A.G	5.57483e-25	ENSG00000164796	CT-G.G	2.94311e-53	ENSG00000231051	CA-C.G	1.97493e-26	ENSG00000183020	CA-C.T	1.18711e-08	ENSG00000157693	CT-A.T	0.000308488	ENSG00000143631	CT-T.C	5.8866e-06	ENSG00000204172	TC-A.A	0.229462	ENSG00000134249	CA-T.T	0.0301548	ENSG00000145113	CA-G.T	3.93656e-05	ENSG00000009307	CG-C.T	0.00774246	ENSG00000179271	CA-G.C	0.00350448	ENSG00000141510	TA-C.C	7.32506e-05	ENSG00000253159	CT-G.G	4.73182e-30	ENSG00000253910	CT-T.C	1.38013e-37	ENSG00000204970	CA-T.T	1.43722e-19	ENSG00000066032	CA-G.A	5.40114e-150	ENSG00000080910	CT-T.A
ENSG00000183117	CA-T.T	6.2994e-25	ENSG00000185053	CT-G.G	5.27207e-53	ENSG00000235780	CA-C.G	1.97493e-26	ENSG00000184956	CA-C.T	1.18711e-08	ENSG00000179344	CT-A.T	0.000308488	ENSG00000155657	CA-A.T	7.86475e-06	ENSG00000234734	CA-A.A	0.310595	ENSG00000157764	CG-A.T	0.0301548	ENSG00000145113	CT-A.A	3.93656e-05	ENSG00000177721	CG-C.T	0.00774246	ENSG00000187013	CA-G.C	0.00350448	ENSG00000172037	CT-G.G	8.91495e-05	ENSG00000254122	CT-A.G	7.20064e-30	ENSG00000204961	CT-G.G	4.31228e-37	ENSG00000255408	CA-T.T	1.43722e-19	ENSG00000066032	TC-T.T	1.48094e-149	ENSG00000084453	CT-T.C
ENSG00000153707	CT-T.A	7.90381e-25	ENSG00000174469	TC-A.A	1.57797e-52	ENSG00000255168	CT-A.A	1.97493e-26	ENSG00000168300	CA-G.C	1.18711e-08	ENSG00000107937	CT-C.C	0.000308488	ENSG00000155657	TA-A.C	8.06004e-06	ENSG00000242284	CA-A.A	0.310595	ENSG00000157764	CG-C.A	0.0301548	ENSG00000145113	CT-A.C	3.93656e-05	ENSG00000213281	CG-C.T	0.00774246	ENSG00000073169	CA-G.G	0.00350448	ENSG00000141510	TA-C.A	0.000134349	ENSG00000253910	CT-T.A	8.1087e-29	ENSG00000262209	CT-G.G	8.60641e-37	ENSG00000249034	CT-A.G	1.85746e-19	ENSG00000078328	CA-G.T	1.92735e-149	ENSG00000111052	CT-T.C
ENSG00000183715	CT-A.G	9.50723e-25	ENSG00000150275	CT-C.T	6.18122e-52	ENSG00000163386	CT-A.G	1.97493e-26	ENSG00000184956	CA-G.C	1.18711e-08	ENSG00000167393	CT-C.G	0.000308488	ENSG00000115234	CT-T.A	9.46333e-06	ENSG00000268538	CA-A.A	0.310595	ENSG00000171425	CG-C.C	0.0301548	ENSG00000165269	CA-A.G	7.85472e-05	ENSG00000196119	CG-G.A	0.00774246	ENSG00000128159	CA-G.G	0.00350448	ENSG00000141510	TG-G.A	0.000248937	ENSG00000254122	CT-C.G	9.29276e-29	ENSG00000204962	CT-G.G	1.41381e-36	ENSG00000204963	CA-T.T	3.83654e-19	ENSG00000048052	TC-A.A	2.63949e-149	ENSG00000114757	CT-T.A
ENSG00000153707	CA-A.A	1.4565e-24	ENSG00000174473	CT-G.G	1.10031e-51	ENSG00000058453	CT-C.G	1.97493e-26	ENSG00000232941	CA-G.C	1.18711e-08	ENSG00000179344	CT-C.G	0.000308488	ENSG00000163554	CT-T.C	1.03927e-05	ENSG00000067048	CA-A.C	0.310595	ENSG00000173581	CG-C.C	0.0301548	ENSG00000145113	CT-G.G	8.84082e-05	ENSG00000041988	CG-T.A	0.00774246	ENSG00000164047	CA-G.G	0.00350448	ENSG00000141510	CG-A.A	0.000264736	ENSG00000253485	CT-T.A	1.08205e-27	ENSG00000262209	CT-T.G	2.13993e-36	ENSG00000251664	CT-T.G	5.06907e-19	ENSG00000066032	CT-C.T	1.37309e-148	ENSG00000118997	CT-T.G
ENSG00000174469	CT-T.G	1.67302e-24	ENSG00000196090	CT-A.G	1.56169e-51	ENSG00000237683	CT-C.G	1.97493e-26	ENSG00000184956	CA-T.C	1.18711e-08	ENSG00000092377	CT-C.T	0.000308488	ENSG00000155657	TC-G.G	1.03927e-05	ENSG00000166160	CA-A.C	0.310595	ENSG00000213015	CG-C.C	0.0301548	ENSG00000135976	CT-T.A	0.000195452	ENSG00000166681	CG-T.C	0.00774246	ENSG00000197191	CA-G.G	0.00350448	ENSG00000141510	CG-C.C	0.000264736	ENSG00000254221	CT-T.A	1.1881e-27	ENSG00000253731	CT-G.G	4.51955e-36	ENSG00000081842	CA-G.G	9.2176e-19	ENSG00000021645	TC-A.A	1.90262e-148	ENSG00000139767	CT-T.A
ENSG00000175161	CT-A.G	1.90073e-24	ENSG00000185737	CT-A.G	2.41975e-51	ENSG00000255168	CT-G.A	1.97493e-26	ENSG00000070756	CA-T.T	1.18711e-08	ENSG00000126733	CT-G.C	0.000308488	ENSG00000155657	TC-T.C	1.03927e-05	ENSG00000169246	CA-A.C	0.310595	ENSG00000174374	CG-C.T	0.0301548	ENSG00000145113	CA-C.A	0.000272994	ENSG00000196408	CG-T.C	0.00774246	ENSG00000212864	CA-G.G	0.00350448	ENSG00000141510	TA-G.A	0.000264736	ENSG00000262576	CT-T.A	1.1881e-27	ENSG00000204967	CT-C.G	1.69873e-35	ENSG00000204963	CA-G.G	9.2176e-19	ENSG00000066032	TA-C.T	5.8639e-148	ENSG00000144057	CT-T.C
ENSG00000145416	CT-A.G	2.21351e-23	ENSG00000188107	TA-A.T	2.75437e-51	ENSG00000163046	CT-G.G	1.97493e-26	ENSG00000184956	CG-A.T	1.18711e-08	ENSG00000092067	CT-G.G	0.000308488	ENSG00000181143	CT-T.G	1.05127e-05	ENSG00000259243	CA-A.C	0.310595	ENSG00000215454	CG-G.A	0.0301548	ENSG00000135976	CG-T.T	0.000272994	ENSG00000196408	CG-T.T	0.00774246	ENSG00000166351	CA-T.A	0.00350448	ENSG00000141510	TC-T.T	0.000264736	ENSG00000253731	CT-T.A	4.67651e-26	ENSG00000154358	CT-A.G	2.4584e-35	ENSG00000204965	CA-G.G	9.2176e-19	ENSG00000078328	TG-T.T	5.14317e-147	ENSG00000089250	CT-T.G
ENSG00000187323	CT-G.G	2.96414e-23	ENSG00000175497	CA-A.A	3.08067e-51	ENSG00000240240	TC-A.A	1.97493e-26	ENSG00000198535	CG-C.G	1.18711e-08	ENSG00000126733	CT-G.G	0.000308488	ENSG00000181143	TG-C.T	1.44601e-05	ENSG00000197172	CA-A.G	0.310595	ENSG00000241123	CG-G.A	0.0301548	ENSG00000183889	CT-G.G	0.000272994	ENSG00000172377	CT-A.C	0.00774246	ENSG00000150779	CA-T.C	0.00350448	ENSG00000141510	TG-A.A	0.000264736	ENSG00000253537	CT-T.G	7.51146e-26	ENSG00000154358	CT-G.G	2.4584e-35	ENSG00000204961	CA-G.G	1.1825e-17	ENSG00000078328	TC-T.T	5.34456e-146	ENSG00000145075	CT-T.T
ENSG00000183117	CT-T.G	3.08956e-23	ENSG00000172260	CT-A.G	2.59184e-50	ENSG00000122497	TC-A.T	1.97493e-26	ENSG00000205809	CG-C.G	1.18711e-08	ENSG00000167393	CT-G.G	0.000308488	ENSG00000155657	TA-T.G	1.56234e-05	ENSG00000204503	CA-A.G	0.310595	ENSG00000102981	CG-G.C	0.0301548	ENSG00000145113	TG-T.C	0.000272994	ENSG00000047634	CT-A.G	0.00774246	ENSG00000172315	CA-T.C	0.00350448	ENSG00000213654	CA-G.T	0.000655909	ENSG00000253953	CT-T.G	7.51146e-26	ENSG00000253485	CT-T.G	5.73991e-35	ENSG00000204962	CA-G.G	1.1825e-17	ENSG00000078328	TC-C.C	9.37045e-145	ENSG00000085563	CT-T.A
ENSG00000154162	CT-A.G	3.61412e-23	ENSG00000185565	CT-G.G	2.98606e-50	ENSG00000163386	TC-A.T	1.97493e-26	ENSG00000255641	CG-C.G	1.18711e-08	ENSG00000233670	CT-G.G	0.000308488	ENSG00000155657	CT-G.C	2.00141e-05	ENSG00000234734	CA-A.G	0.310595	ENSG00000124074	CG-G.C	0.0301548	ENSG00000135976	CT-A.T	0.000363142	ENSG00000100417	CT-A.G	0.00774246	ENSG00000198885	CA-T.C	0.00350448	ENSG00000256073	CG-G.C	0.000655909	ENSG00000081853	CG-T.T	1.74706e-25	ENSG00000204967	CT-A.G	6.99331e-35	ENSG00000239389	CT-T.G	9.89143e-17	ENSG00000080224	TC-C.T	8.08856e-144	ENSG00000105784	CT-T.A
ENSG00000172264	CT-A.G	3.94292e-23	ENSG00000148948	CT-G.G	4.52295e-50	ENSG00000242384	TC-C.G	1.97493e-26	ENSG00000004455	CG-C.T	1.18711e-08	ENSG00000250349	CT-G.G	0.000308488	ENSG00000181143	CT-G.C	2.33787e-05	ENSG00000205642	CA-A.T	0.310595	ENSG00000159761	CG-G.C	0.0301548	ENSG00000145113	CA-C.G	0.000465808	ENSG00000103266	CT-A.G	0.00774246	ENSG00000105438	CG-A.A	0.00350448	ENSG00000124529	CG-T.T	0.000655909	ENSG00000204956	CG-T.T	1.74706e-25	ENSG00000204961	CT-T.C	7.00423e-34	ENSG00000248383	CT-C.G	6.24799e-16	ENSG00000066032	TC-C.C	8.78719e-144	ENSG00000114757	CT-T.C
ENSG00000185774	CT-G.G	4.17854e-23	ENSG00000144619	CT-A.G	6.8703e-50	ENSG00000163386	TC-C.T	1.97493e-26	ENSG00000131127	CG-T.T	1.18711e-08	ENSG00000198502	CT-T.A	0.000308488	ENSG00000155657	TC-C.A	2.33787e-05	ENSG00000233788	CA-C.A	0.310595	ENSG00000102312	CG-G.T	0.0301548	ENSG00000135976	TC-T.G	0.000465808	ENSG00000103269	CT-A.G	0.00774246	ENSG00000179295	CG-A.C	0.00350448	ENSG00000149634	CT-A.A	0.000655909	ENSG00000254245	CG-T.T	1.74706e-25	ENSG00000253537	CT-G.G	1.03866e-33	ENSG00000133703	CT-A.C	7.56625e-15	ENSG00000021645	CT-T.C	1.85988e-143	ENSG00000118997	CT-T.T
ENSG00000181234	CT-C.G	4.42218e-23	ENSG00000172264	CT-A.G	8.42645e-50	ENSG00000152042	TC-G.G	1.97493e-26	ENSG00000255374	CG-T.T	1.18711e-08	ENSG00000250349	CT-T.A	0.000308488	ENSG00000155657	CG-G.T	2.75467e-05	ENSG00000234214	CA-C.A	0.310595	ENSG00000144182	CG-G.T	0.0301548	ENSG00000135976	TG-A.T	0.000465808	ENSG00000116176	CT-A.G	0.00774246	ENSG00000204508	CG-A.C	0.00350448	ENSG00000224854	CT-C.C	0.000655909	ENSG00000262209	CT-T.A	1.87482e-25	ENSG00000253953	CT-G.G	1.03866e-33	ENSG00000204969	CT-T.A	8.26023e-15	ENSG00000042781	CT-A.G	9.01168e-143	ENSG00000133107	CT-T.T
ENSG00000150275	TC-A.A	5.85323e-23	ENSG00000174482	CT-A.G	1.08591e-49	ENSG00000203832	TC-G.T	1.97493e-26	ENSG00000169894	CT-A.G	1.18711e-08	ENSG00000198502	CT-T.C	0.000308488	ENSG00000155657	TG-T.G	2.75467e-05	ENSG00000012817	CA-C.C	0.310595	ENSG00000157764	CG-G.T	0.0301548	ENSG00000185567	CT-G.T	0.000580902	ENSG00000131467	CT-A.G	0.00774246	ENSG00000167851	CG-A.T	0.00350448	ENSG00000131097	CT-C.G	0.000655909	ENSG00000253873	CT-A.G	2.86109e-23	ENSG00000204962	CT-T.C	1.66672e-33	ENSG00000204967	CA-G.A	9.29464e-15	ENSG00000078328	TA-T.T	1.14603e-142	ENSG00000120251	CT-T.A
ENSG00000174473	CT-A.G	6.47077e-23	ENSG00000188107	CA-A.A	1.2226e-49	ENSG00000186275	TC-T.T	1.97493e-26	ENSG00000183020	CT-C.C	1.18711e-08	ENSG00000147130	CT-T.G	0.000308488	ENSG00000155657	CG-A.A	2.77613e-05	ENSG00000133433	CA-C.C	0.310595	ENSG00000166170	CG-T.A	0.0301548	ENSG00000135976	TC-A.G	0.000580902	ENSG00000156413	CT-A.G	0.00774246	ENSG00000127554	CG-C.C	0.00350448	ENSG00000250232	CT-C.G	0.000655909	ENSG00000253767	CT-T.G	6.79138e-23	ENSG00000154358	CT-C.G	1.71138e-33	ENSG00000204969	CA-G.A	9.29464e-15	ENSG00000066032	TA-T.T	4.05054e-142	ENSG00000145863	CT-T.A
ENSG00000108684	CT-A.G	9.40519e-23	ENSG00000145526	CT-A.G	1.68906e-49	ENSG00000145113	CG-A.G	7.26296e-26	ENSG00000184956	CT-C.T	1.18711e-08	ENSG00000222022	CT-T.G	0.000308488	ENSG00000155657	TC-C.G	2.82055e-05	ENSG00000205642	CA-C.C	0.310595	ENSG00000204822	CG-T.A	0.0301548	ENSG00000149531	TC-A.T	0.000580902	ENSG00000161999	CT-A.G	0.00774246	ENSG00000127561	CG-C.C	0.00350448	ENSG00000102575	CT-G.G	0.000655909	ENSG00000254221	CG-T.T	5.71784e-22	ENSG00000196565	CT-T.A	1.71138e-33	ENSG00000204970	CA-G.A	9.29464e-15	ENSG00000066032	CA-G.T	2.21355e-140	ENSG00000118733	CT-T.C
ENSG00000165973	CT-A.G	1.49975e-22	ENSG00000168702	CT-G.G	3.8305e-49	ENSG00000145113	CG-C.T	2.55155e-25	ENSG00000134339	CT-G.C	1.18711e-08	ENSG00000100253	CT-T.T	0.000308488	ENSG00000155657	TC-A.T	3.51861e-05	ENSG00000134086	CA-C.G	0.310595	ENSG00000205176	CG-T.A	0.0301548	ENSG00000145113	TG-C.G	0.000580902	ENSG00000163067	CT-A.G	0.00774246	ENSG00000269205	CG-C.C	0.00350448	ENSG00000103254	CT-G.G	0.000655909	ENSG00000262576	CG-T.T	5.71784e-22	ENSG00000186472	CT-T.T	1.71138e-33	ENSG00000255408	CA-G.A	9.29464e-15	ENSG00000087116	CT-A.G	7.15238e-140	ENSG00000136250	CT-T.C
ENSG00000204442	CT-A.G	1.70324e-22	ENSG00000168702	CT-T.T	5.88136e-49	ENSG00000255168	CG-A.A	2.91694e-24	ENSG00000184956	CT-G.C	1.18711e-08	ENSG00000137414	TA-A.A	0.000308488	ENSG00000084674	CT-T.C	3.53765e-05	ENSG00000164897	CA-C.G	0.310595	ENSG00000169676	CG-T.C	0.0301548	ENSG00000135976	TC-A.T	0.000708335	ENSG00000171124	CT-A.G	0.00774246	ENSG00000116337	CG-C.T	0.00350448	ENSG00000114942	CT-G.G	0.000655909	ENSG00000254221	CT-T.C	8.7758e-22	ENSG00000253537	CT-T.G	3.65361e-33	ENSG00000134982	CA-T.A	9.29464e-15	ENSG00000021645	CA-A.A	1.51705e-139	ENSG00000135333	CT-T.T
ENSG00000144451	CT-A.G	1.8282e-22	ENSG00000185345	CT-A.G	6.45959e-49	ENSG00000161583	CT-A.G	2.91694e-24	ENSG00000131042	CT-G.G	1.18711e-08	ENSG00000137414	TA-A.C	0.000308488	ENSG00000155657	TA-C.T	4.59801e-05	ENSG00000184674	CA-C.T	0.310595	ENSG00000228836	CG-T.C	0.0301548	ENSG00000145113	CT-C.C	0.00084802	ENSG00000187325	CT-A.G	0.00774246	ENSG00000205642	CG-C.T	0.00350448	ENSG00000184730	CT-G.G	0.000655909	ENSG00000253159	CT-A.G	1.82495e-21	ENSG00000253953	CT-T.G	3.65361e-33	ENSG00000134982	CT-A.G	9.29464e-15	ENSG00000066032	TA-A.T	2.3204e-139	ENSG00000038295	CT-T.C
ENSG00000157168	CT-A.G	2.36367e-22	ENSG00000150275	CT-T.T	7.93129e-49	ENSG00000242384	CT-A.G	2.91694e-24	ENSG00000172199	CT-G.G	1.18711e-08	ENSG00000171163	TA-C.G	0.000308488	ENSG00000181143	CA-T.A	4.80753e-05	ENSG00000247746	CA-C.T	0.310595	ENSG00000242284	CG-T.C	0.0301548	ENSG00000145113	CT-A.G	0.000999869	ENSG00000188694	CT-A.G	0.00774246	ENSG00000179295	CG-G.T	0.00350448	ENSG00000011009	CT-T.G	0.000655909	ENSG00000262576	CT-T.C	4.034e-21	ENSG00000155495	CT-T.C	3.96985e-33	ENSG00000204970	CT-T.A	1.51353e-14	ENSG00000066032	CA-C.C	1.0213e-138	ENSG00000144331	CT-T.T
ENSG00000174469	TA-A.T	2.67227e-22	ENSG00000155052	CT-A.G	8.37625e-49	ENSG00000255168	CT-A.G	2.91694e-24	ENSG00000205853	CT-G.G	1.18711e-08	ENSG00000196126	TA-C.T	0.000308488	ENSG00000143631	CT-A.G	4.80753e-05	ENSG00000134086	CA-G.A	0.310595	ENSG00000165644	CG-T.G	0.0301548	ENSG00000181143	CT-A.G	0.00133971	ENSG00000196171	CT-A.G	0.00774246	ENSG00000179295	CG-T.C	0.00350448	ENSG00000187266	CT-T.T	0.000655909	ENSG00000253485	CG-T.T	8.36893e-21	ENSG00000204956	CT-C.G	1.61186e-32	ENSG00000204969	CT-C.T	2.1923e-14	ENSG00000021645	CT-C.T	2.53892e-138	ENSG00000089250	CT-T.A
ENSG00000174469	CT-T.T	2.74928e-22	ENSG00000150275	CA-T.T	9.70413e-49	ENSG00000163046	CT-C.G	2.91694e-24	ENSG00000137944	CT-G.T	1.18711e-08	ENSG00000126733	TA-G.A	0.000308488	ENSG00000143631	CT-T.G	4.80753e-05	ENSG00000269011	CA-G.A	0.310595	ENSG00000165370	CG-T.T	0.0301548	ENSG00000181143	TA-C.G	0.00172717	ENSG00000152207	CT-C.A	0.00774246	ENSG00000249624	CT-A.A	0.00350448	ENSG00000114942	TC-C.G	0.000655909	ENSG00000253910	CG-T.T	8.36893e-21	ENSG00000204962	CT-T.G	1.87837e-32	ENSG00000255408	CT-C.T	2.1923e-14	ENSG00000021645	CA-C.A	9.12937e-137	ENSG00000117069	CT-T.A
ENSG00000168702	CT-T.G	3.10999e-22	ENSG00000153707	CT-T.G	9.70413e-49	ENSG00000163386	CT-C.G	2.91694e-24	ENSG00000184956	CT-G.T	1.18711e-08	ENSG00000185915	TA-G.G	0.000308488	ENSG00000067445	CA-C.A	5.23611e-05	ENSG00000134086	CA-G.C	0.310595	ENSG00000171425	CG-T.T	0.0301548	ENSG00000165269	CT-C.G	0.00239615	ENSG00000213654	CT-C.A	0.00774246	ENSG00000092201	CT-A.C	0.00350448	ENSG00000133703	TC-T.A	0.000655909	ENSG00000253873	CT-C.G	1.61345e-20	ENSG00000250120	CT-T.G	1.88267e-32	ENSG00000081842	CA-C.C	2.34997e-14	ENSG00000048052	CA-T.T	2.98899e-136	ENSG00000078725	CT-T.C
ENSG00000175497	CA-T.T	4.40242e-22	ENSG00000168702	TC-A.A	9.70413e-49	ENSG00000175170	CT-C.G	2.91694e-24	ENSG00000213516	CT-G.T	1.18711e-08	ENSG00000250349	TA-T.T	0.000308488	ENSG00000168036	CA-T.T	5.23611e-05	ENSG00000166160	CA-G.C	0.310595	ENSG00000173581	CG-T.T	0.0301548	ENSG00000145113	CA-A.A	0.00366748	ENSG00000100197	CT-C.C	0.00774246	ENSG00000092201	CT-A.G	0.00350448	ENSG00000141510	TG-C.C	0.000655909	ENSG00000253910	CT-T.C	1.85319e-20	ENSG00000253731	CT-T.G	2.09404e-32	ENSG00000204965	CA-C.C	2.34997e-14	ENSG00000021645	CG-T.T	1.93523e-134	ENSG00000111052	CT-T.A
ENSG00000185008	CT-G.G	6.01152e-22	ENSG00000153707	TA-T.T	2.73665e-48	ENSG00000152042	CT-G.C	2.91694e-24	ENSG00000169894	CT-T.C	1.18711e-08	ENSG00000128045	TC-A.C	0.000308488	ENSG00000047410	CG-A.T	5.23611e-05	ENSG00000178809	CA-G.C	0.310595	ENSG00000183114	CG-T.T	0.0301548	ENSG00000124574	CA-A.C	0.00366748	ENSG00000102109	CT-C.C	0.00774246	ENSG00000105258	CT-A.G	0.00350448	ENSG00000141510	TA-C.G	0.000694711	ENSG00000204956	CT-T.C	1.86157e-20	ENSG00000181143	CT-C.A	3.1779e-32	ENSG00000204967	CA-C.C	2.34997e-14	ENSG00000078328	CA-A.T	2.17679e-134	ENSG00000112706	CT-T.C
ENSG00000149972	CT-A.G	6.08014e-22	ENSG00000185565	CG-T.T	3.64253e-48	ENSG00000255168	CT-G.G	2.91694e-24	ENSG00000228273	CT-T.C	1.18711e-08	ENSG00000133317	TC-A.T	0.000308488	ENSG00000148843	CG-T.A	5.23611e-05	ENSG00000204479	CA-G.C	0.310595	ENSG00000187601	CG-T.T	0.0301548	ENSG00000171462	CA-A.C	0.00366748	ENSG00000111665	CT-C.C	0.00774246	ENSG00000105261	CT-A.G	0.00350448	ENSG00000141510	CG-T.A	0.000739313	ENSG00000121879	TC-A.G	3.05923e-20	ENSG00000204961	CT-T.G	4.21043e-32	ENSG00000204969	CA-C.C	2.34997e-14	ENSG00000060709	CT-G.G	4.4291e-134	ENSG00000136531	CT-T.C
ENSG00000139915	CT-A.G	7.09252e-22	ENSG00000168702	CT-T.A	4.59492e-48	ENSG00000163386	CT-T.G	2.91694e-24	ENSG00000131127	TA-C.G	1.18711e-08	ENSG00000157693	TC-A.T	0.000308488	ENSG00000166987	CG-T.A	5.23611e-05	ENSG00000134086	CA-G.T	0.310595	ENSG00000111786	CT-A.A	0.0301548	ENSG00000037897	CA-C.A	0.00366748	ENSG00000126947	CT-C.C	0.00774246	ENSG00000172922	CT-A.G	0.00350448	ENSG00000141510	TG-C.A	0.000739313	ENSG00000081853	CT-T.C	4.98575e-20	ENSG00000186472	CT-T.A	1.18472e-31	ENSG00000255408	CA-C.C	2.34997e-14	ENSG00000021645	CT-A.A	1.31417e-133	ENSG00000138039	CT-T.C
ENSG00000272781	CT-A.G	7.09252e-22	ENSG00000188107	CT-T.A	4.59492e-48	ENSG00000203832	TA-A.C	2.91694e-24	ENSG00000185958	TA-C.G	1.18711e-08	ENSG00000171163	TC-A.T	0.000308488	ENSG00000184260	CG-T.G	5.23611e-05	ENSG00000197172	CA-G.T	0.310595	ENSG00000161960	CT-A.A	0.0301548	ENSG00000110536	CA-C.A	0.00366748	ENSG00000244414	CT-C.C	0.00774246	ENSG00000249624	CT-A.G	0.00350448	ENSG00000141510	TG-G.C	0.000739313	ENSG00000254245	CT-T.C	4.98575e-20	ENSG00000253767	CT-G.G	1.52273e-31	ENSG00000204970	CT-G.C	3.91682e-14	ENSG00000066032	CA-T.C	3.18183e-133	ENSG00000122507	CT-T.A
ENSG00000174469	CT-T.A	1.48043e-21	ENSG00000182667	CT-C.G	6.44063e-48	ENSG00000174501	TC-A.A	2.91694e-24	ENSG00000111215	TC-A.A	1.18711e-08	ENSG00000198502	TC-A.T	0.000308488	ENSG00000184270	CG-T.G	5.23611e-05	ENSG00000229549	CA-T.A	0.310595	ENSG00000166170	CT-A.A	0.0301548	ENSG00000111012	CA-C.A	0.00366748	ENSG00000009307	CT-C.G	0.00774246	ENSG00000169188	CT-C.A	0.00350448	ENSG00000141510	CG-C.A	0.000855835	ENSG00000253485	CT-T.C	5.48557e-20	ENSG00000253485	CT-T.C	2.20713e-30	ENSG00000204970	CT-C.T	5.546e-14	ENSG00000078328	CT-C.A	1.51054e-132	ENSG00000117069	CT-T.C
ENSG00000144451	CT-G.G	1.57307e-21	ENSG00000164796	CA-A.A	6.71679e-48	ENSG00000203836	TC-A.G	2.91694e-24	ENSG00000212127	TC-A.A	1.18711e-08	ENSG00000227152	TC-A.T	0.000308488	ENSG00000184678	CG-T.G	5.23611e-05	ENSG00000015568	CA-T.C	0.310595	ENSG00000189299	CT-A.A	0.0301548	ENSG00000123444	CA-C.A	0.00366748	ENSG00000100364	CT-C.G	0.00774246	ENSG00000157895	CT-C.G	0.00350448	ENSG00000141510	CG-T.C	0.000855835	ENSG00000204956	CG-T.A	1.21506e-19	ENSG00000204970	CT-T.A	3.02766e-30	ENSG00000204970	CA-C.C	9.91334e-14	ENSG00000078328	CG-T.A	3.19705e-131	ENSG00000140873	CT-T.T
ENSG00000183117	CA-A.A	2.43309e-21	ENSG00000198626	CT-A.G	7.31198e-48	ENSG00000255168	TC-A.G	2.91694e-24	ENSG00000226761	TC-A.C	1.18711e-08	ENSG00000115129	TG-G.G	0.000308488	ENSG00000116690	CG-T.T	5.23611e-05	ENSG00000067048	CA-T.T	0.310595	ENSG00000102981	CT-A.C	0.0301548	ENSG00000142178	CA-C.A	0.00366748	ENSG00000109917	CT-C.G	0.00774246	ENSG00000176101	CT-C.G	0.00350448	ENSG00000141510	TC-C.C	0.00145707	ENSG00000253731	CT-T.C	5.16409e-19	ENSG00000081853	CT-C.G	5.57698e-30	ENSG00000081842	CA-G.A	1.38113e-13	ENSG00000021645	TC-T.T	1.74792e-130	ENSG00000132874	CT-C.A
ENSG00000182050	CT-A.G	2.45239e-21	ENSG00000147481	CT-A.G	1.1881e-47	ENSG00000163386	TC-G.T	2.91694e-24	ENSG00000169894	TC-C.C	1.18711e-08	ENSG00000174469	CT-C.A	0.00031964	ENSG00000143374	CG-T.T	5.23611e-05	ENSG00000134086	CG-A.T	0.310595	ENSG00000124074	CT-A.C	0.0301548	ENSG00000164889	CA-C.A	0.00366748	ENSG00000110243	CT-C.G	0.00774246	ENSG00000179295	CT-C.G	0.00350448	ENSG00000141510	TC-G.T	0.0016062	ENSG00000254221	CT-G.A	6.30622e-19	ENSG00000254245	CT-C.G	5.57698e-30	ENSG00000204965	CA-G.A	1.38113e-13	ENSG00000048052	CT-T.T	1.82481e-130	ENSG00000109738	CT-T.A
ENSG00000108684	CT-T.T	2.46107e-21	ENSG00000165973	CT-A.G	1.29487e-47	ENSG00000163386	TC-T.A	2.91694e-24	ENSG00000131127	TC-G.A	1.18711e-08	ENSG00000164796	CT-A.T	0.000354382	ENSG00000182572	CG-T.T	5.23611e-05	ENSG00000205642	CG-C.A	0.310595	ENSG00000131650	CT-A.C	0.0301548	ENSG00000231880	CA-C.A	0.00366748	ENSG00000122122	CT-C.G	0.00774246	ENSG00000223572	CT-C.G	0.00350448	ENSG00000141510	TG-A.G	0.0016062	ENSG00000262576	CT-G.A	6.30622e-19	ENSG00000145191	CT-A.G	8.15593e-30	ENSG00000204969	CG-T.A	1.38113e-13	ENSG00000066032	TC-A.G	3.09251e-130	ENSG00000102683	CT-T.C
ENSG00000108684	CT-G.G	2.47571e-21	ENSG00000164796	CA-T.T	2.50817e-47	ENSG00000255168	TC-T.A	2.91694e-24	ENSG00000111215	TC-G.T	1.18711e-08	ENSG00000153707	TC-T.T	0.000476593	ENSG00000180929	CT-A.G	5.23611e-05	ENSG00000164897	CG-C.C	0.310595	ENSG00000159761	CT-A.C	0.0301548	ENSG00000068078	CA-C.C	0.00366748	ENSG00000131467	CT-C.G	0.00774246	ENSG00000167851	CT-C.T	0.00350448	ENSG00000204304	CT-C.C	0.00245296	ENSG00000262209	CT-T.C	1.25027e-18	ENSG00000213931	CT-T.A	8.15593e-30	ENSG00000204970	CG-T.A	1.38113e-13	ENSG00000078328	TA-C.T	1.6489e-129	ENSG00000122691	CT-T.C
ENSG00000185774	CT-A.G	2.62118e-21	ENSG00000155093	CT-C.G	2.91453e-47	ENSG00000145113	CT-A.G	2.24706e-22	ENSG00000212127	TC-G.T	1.18711e-08	ENSG00000168702	CT-A.T	0.000504729	ENSG00000143258	CT-C.C	5.23611e-05	ENSG00000258755	CG-C.C	0.310595	ENSG00000162073	CT-A.C	0.0301548	ENSG00000169682	CA-C.C	0.00366748	ENSG00000152207	CT-C.G	0.00774246	ENSG00000175548	CT-G.A	0.00350448	ENSG00000213654	CT-C.C	0.00245296	ENSG00000081853	CG-T.A	1.74869e-18	ENSG00000196218	CT-T.C	8.15593e-30	ENSG00000255408	CG-T.A	1.38113e-13	ENSG00000080224	TG-C.T	4.82662e-129	ENSG00000139304	CT-T.T
ENSG00000174469	CA-C.T	3.32185e-21	ENSG00000174469	CA-A.A	3.11547e-47	ENSG00000162825	CA-C.A	4.25735e-22	ENSG00000169894	TC-T.G	1.18711e-08	ENSG00000169306	CT-A.T	0.000532577	ENSG00000135973	CT-G.G	5.23611e-05	ENSG00000196934	CG-C.G	0.310595	ENSG00000189299	CT-A.C	0.0301548	ENSG00000213658	CA-C.C	0.00366748	ENSG00000174307	CT-C.G	0.00774246	ENSG00000215131	CT-G.C	0.00350448	ENSG00000141510	TA-A.A	0.00245296	ENSG00000254245	CG-T.A	1.74869e-18	ENSG00000186472	CT-T.G	8.15593e-30	ENSG00000248383	CT-A.G	1.38113e-13	ENSG00000075213	TC-A.A	2.68111e-128	ENSG00000145431	CT-T.A
ENSG00000150275	CT-A.T	4.17659e-21	ENSG00000150275	TC-A.T	3.11547e-47	ENSG00000163386	CA-C.T	4.25735e-22	ENSG00000228273	TC-T.G	1.18711e-08	ENSG00000198947	TC-A.A	0.000750628	ENSG00000148843	CT-G.G	5.23611e-05	ENSG00000129194	CG-C.T	0.310595	ENSG00000232941	CT-A.C	0.0301548	ENSG00000184357	CA-C.G	0.00366748	ENSG00000176903	CT-C.G	0.00774246	ENSG00000073169	CT-G.G	0.00350448	ENSG00000141510	TC-G.C	0.00245296	ENSG00000262209	CG-T.T	1.74869e-18	ENSG00000253767	CT-T.G	1.29513e-29	ENSG00000248383	CT-G.G	1.38113e-13	ENSG00000066032	CA-A.C	5.36551e-128	ENSG00000112038	CT-T.C
ENSG00000159216	CT-C.T	5.50199e-21	ENSG00000153707	CT-T.A	4.71982e-47	ENSG00000255168	CA-C.T	4.25735e-22	ENSG00000101307	TC-T.T	1.18711e-08	ENSG00000153707	TA-C.G	0.000807982	ENSG00000146826	CT-T.A	5.23611e-05	ENSG00000169627	CG-C.T	0.310595	ENSG00000254505	CT-A.C	0.0301548	ENSG00000198374	CA-C.G	0.00366748	ENSG00000177733	CT-C.G	0.00774246	ENSG00000128159	CT-G.G	0.00350448	ENSG00000141510	TG-G.T	0.00245296	ENSG00000081853	CT-G.A	2.7374e-18	ENSG00000204967	CT-T.A	1.33291e-29	ENSG00000204969	CT-T.C	1.50167e-13	ENSG00000078328	CT-G.T	2.08606e-127	ENSG00000140600	CT-T.C
ENSG00000183117	CA-C.A	6.72281e-21	ENSG00000174482	CT-G.G	5.1008e-47	ENSG00000186275	CG-A.C	4.25735e-22	ENSG00000184956	TG-G.T	1.18711e-08	ENSG00000153707	TC-G.C	0.000883697	ENSG00000148843	CT-T.A	5.23611e-05	ENSG00000197978	CG-C.T	0.310595	ENSG00000132481	CT-A.G	0.0301548	ENSG00000145113	CA-C.T	0.00366748	ENSG00000182287	CT-C.G	0.00774246	ENSG00000157322	CT-G.G	0.00350448	ENSG00000141510	TG-T.C	0.00245296	ENSG00000254245	CT-G.A	2.7374e-18	ENSG00000254221	CT-C.G	2.35835e-29	ENSG00000255408	CT-T.C	1.50167e-13	ENSG00000042781	CA-T.T	3.92671e-126	ENSG00000104043	CT-T.T
[truncated: 1 more columns]

## Sheet: Supplementary Table S6
Table S6 : Full list of all enriched gene ontology associated with our identified subtypes. Sheet2: Full list of all enrich pathways associated with our identified subtypes.
Term	Adjusted.P.value	subtype	type
monocarboxylic acid transmembrane transporter activity	0.0218673	C17	Molecular_Function
secondary active transmembrane transporter activity	0.0114107	C17	Molecular_Function
sodium-independent organic anion transmembrane transporter activity	0.00826275	C17	Molecular_Function
organic anion transmembrane transporter activity	0.00760552	C17	Molecular_Function
inhibitory extracellular ligand-gated ion channel activity	0.0121607	C17	Molecular_Function
bile acid transmembrane transporter activity	0.0124273	C17	Molecular_Function
ligand-gated anion channel activity	0.0154091	C17	Molecular_Function
extracellular ligand-gated ion channel activity	0.0190612	C17	Molecular_Function
neurotransmitter receptor activity involved in regulation of postsynaptic membrane potential	0.0193225	C17	Molecular_Function
chloride transmembrane transporter activity	0.0203741	C17	Molecular_Function
chloride channel activity	0.0258182	C17	Molecular_Function
anion channel activity	0.0320672	C17	Molecular_Function
integral component of plasma membrane	7.22523e-05	C17	Cellular_Component
nervous system development	5.37318e-08	C15	Biological_Process
integral component of plasma membrane	1.68601e-05	C15	Cellular_Component
nervous system development	1.76091e-31	C14	Biological_Process
synapse assembly	7.08825e-05	C14	Biological_Process
muscle filament sliding	0.00211592	C14	Biological_Process
actin-myosin filament sliding	0.00158694	C14	Biological_Process
calcium-dependent cell-cell adhesion via plasma membrane cell adhesion molecules	0.00187308	C14	Biological_Process
epidermis development	0.00273757	C14	Biological_Process
skin development	0.005587	C14	Biological_Process
regulation of water loss via skin	0.0413227	C14	Biological_Process
establishment of skin barrier	0.0367313	C14	Biological_Process
muscle contraction	0.0332125	C14	Biological_Process
cell-cell adhesion via plasma-membrane adhesion molecules	0.0368401	C14	Biological_Process
ATP-dependent microtubule motor activity, minus-end-directed	1.91806e-05	C14	Molecular_Function
ATP-dependent microtubule motor activity	7.99971e-05	C14	Molecular_Function
motor activity	8.69413e-05	C14	Molecular_Function
ATPase activity	0.00236357	C14	Molecular_Function
microfilament motor activity	0.0215727	C14	Molecular_Function
ankyrin binding	0.0179773	C14	Molecular_Function
microtubule motor activity	0.0380562	C14	Molecular_Function
integral component of plasma membrane	1.82131e-17	C14	Cellular_Component
axonemal dynein complex	0.000228002	C14	Cellular_Component
contractile fiber	0.00120157	C14	Cellular_Component
myofibril	0.00105385	C14	Cellular_Component
intermediate filament cytoskeleton	0.0394438	C14	Cellular_Component
nervous system development	3.37103e-23	C13	Biological_Process
calcium-dependent cell-cell adhesion via plasma membrane cell adhesion molecules	6.24831e-08	C13	Biological_Process
synapse assembly	1.543e-06	C13	Biological_Process
cell-cell adhesion via plasma-membrane adhesion molecules	0.000725309	C13	Biological_Process
chemical synaptic transmission	0.00190901	C13	Biological_Process
anterograde trans-synaptic signaling	0.00278277	C13	Biological_Process
establishment of skin barrier	0.0472259	C13	Biological_Process
regulation of water loss via skin	0.0413227	C13	Biological_Process
integral component of plasma membrane	1.57334e-10	C13	Cellular_Component
positive regulation of establishment of protein localization to mitochondrion	0.0482349	C6	Biological_Process
MHC class II protein complex	0.0189172	C5	Cellular_Component
MHC protein complex	0.020898	C5	Cellular_Component
integral component of lumenal side of endoplasmic reticulum membrane	0.0449591	C5	Cellular_Component
detection of chemical stimulus involved in sensory perception of bitter taste	0.00785452	C4	Biological_Process
sensory perception of bitter taste	0.00445524	C4	Biological_Process
detection of chemical stimulus involved in sensory perception of taste	0.00425404	C4	Biological_Process
cellular defense response	0.0107075	C4	Biological_Process
O-glycan processing	0.0178826	C4	Biological_Process
protein O-linked glycosylation	0.0195505	C4	Biological_Process
stimulatory C-type lectin receptor signaling pathway	0.0223501	C4	Biological_Process
innate immune response activating cell surface receptor signaling pathway	0.0224528	C4	Biological_Process
regulation of immune response	0.0199759	C4	Biological_Process
bitter taste receptor activity	0.0001517	C4	Molecular_Function
taste receptor activity	0.000236936	C4	Molecular_Function
spindle assembly	0.0152701	C3	Biological_Process
regulation of vesicle fusion	0.0343482	C3	Biological_Process
Golgi cisterna membrane	2.06305e-06	C3	Cellular_Component
Golgi cis cisterna	1.03152e-06	C3	Cellular_Component
cis-Golgi network	1.81552e-05	C3	Cellular_Component
Golgi cisterna	1.9909e-05	C3	Cellular_Component
cell-cell adhesion via plasma-membrane adhesion molecules	2.85045e-08	C2	Biological_Process
C-terminal protein amino acid modification	6.83099e-07	C2	Biological_Process
homophilic cell adhesion via plasma membrane adhesion molecules	1.61976e-06	C2	Biological_Process
C-terminal protein lipidation	0.000112942	C2	Biological_Process
axonogenesis	0.000162401	C2	Biological_Process
nervous system development	0.000327887	C2	Biological_Process
regulation of synapse assembly	0.000564523	C2	Biological_Process
adherens junction organization	0.00159526	C2	Biological_Process
protein lipidation	0.00183305	C2	Biological_Process
heterophilic cell-cell adhesion via plasma membrane cell adhesion molecules	0.00178156	C2	Biological_Process
cell-cell adhesion mediated by cadherin	0.00215832	C2	Biological_Process
positive regulation of synapse assembly	0.00330242	C2	Biological_Process
cell morphogenesis	0.00426768	C2	Biological_Process
axon guidance	0.00496208	C2	Biological_Process
cell-cell junction organization	0.00982482	C2	Biological_Process
neuron cell-cell adhesion	0.0131274	C2	Biological_Process
calcium-dependent cell-cell adhesion via plasma membrane cell adhesion molecules	0.0149174	C2	Biological_Process
heart contraction	0.0186721	C2	Biological_Process
positive regulation of nervous system development	0.0342247	C2	Biological_Process
protein localization to membrane	0.0369479	C2	Biological_Process
regulation of ERBB signaling pathway	0.0411159	C2	Biological_Process
regulation of release of sequestered calcium ion into cytosol by sarcoplasmic reticulum	0.0449722	C2	Biological_Process
membrane assembly	0.0430169	C2	Biological_Process
positive regulation of cell morphogenesis involved in differentiation	0.0415083	C2	Biological_Process
cell junction assembly	0.0425847	C2	Biological_Process
receptor clustering	0.0433337	C2	Biological_Process
catenin complex	0.0047077	C2	Cellular_Component
dystrophin-associated glycoprotein complex	0.00917865	C2	Cellular_Component
integral component of plasma membrane	0.0132351	C2	Cellular_Component
axolemma	0.0400454	C2	Cellular_Component
cell-cell adhesion via plasma-membrane adhesion molecules	1.24906e-09	C1	Biological_Process
homophilic cell adhesion via plasma membrane adhesion molecules	6.90614e-08	C1	Biological_Process
C-terminal protein amino acid modification	4.55399e-07	C1	Biological_Process
nervous system development	6.77738e-05	C1	Biological_Process
C-terminal protein lipidation	9.03532e-05	C1	Biological_Process
regulation of synapse assembly	0.000658611	C1	Biological_Process
cell-cell junction organization	0.00110415	C1	Biological_Process
axonogenesis	0.0010491	C1	Biological_Process
adherens junction organization	0.00141801	C1	Biological_Process
protein lipidation	0.00164974	C1	Biological_Process
heterophilic cell-cell adhesion via plasma membrane cell adhesion molecules	0.0016196	C1	Biological_Process
cell-cell adhesion mediated by cadherin	0.00197846	C1	Biological_Process
positive regulation of synapse assembly	0.00304839	C1	Biological_Process
cell morphogenesis	0.00396284	C1	Biological_Process
axon guidance	0.00463127	C1	Biological_Process
neuron cell-cell adhesion	0.0131274	C1	Biological_Process
calcium-dependent cell-cell adhesion via plasma membrane cell adhesion molecules	0.0149174	C1	Biological_Process
heart contraction	0.0186721	C1	Biological_Process
positive regulation of nervous system development	0.0342247	C1	Biological_Process
protein localization to membrane	0.0369479	C1	Biological_Process
regulation of ERBB signaling pathway	0.0411159	C1	Biological_Process
regulation of release of sequestered calcium ion into cytosol by sarcoplasmic reticulum	0.0449722	C1	Biological_Process
membrane assembly	0.0430169	C1	Biological_Process
positive regulation of cell morphogenesis involved in differentiation	0.0415083	C1	Biological_Process
cell junction assembly	0.0425847	C1	Biological_Process
receptor clustering	0.0433337	C1	Biological_Process
glutamate receptor activity	0.00296355	C1	Molecular_Function
catenin complex	0.0047077	C1	Cellular_Component
dystrophin-associated glycoprotein complex	0.00917865	C1	Cellular_Component

## Sheet: Supplementary Table S7
Table S7. Similarity of Cosmic Signatures and Pan-cancer subtypes
Cosmic Signature	C1		C2														C3			C4				C5							C6						C7								C8
	Signature 1	Signature 2	Signature 1	Signature 2	Signature 3	Signature 4	Signature 5	Signature 6	Signature 7	Signature 8	Signature 9	Signature 10	Signature 11	Signature 12	Signature 13	Signature 14	Signature 1	Signature 2	Signature 3	Signature 1	Signature 2	Signature 3	Signature 4	Signature 1	Signature 2	Signature 3	Signature 4	Signature 5	Signature 6	Signature 7	Signature 1	Signature 2	Signature 3	Signature 4	Signature 5	Signature 6	Signature 1	Signature 2	Signature 3	Signature 4	Signature 5	Signature 6	Signature 7	Signature 8	Signature 1	Signature 2	Signature 3	Signature 4	Signature 5
SBS1	0.182433	0.0540553	0.197358	0.0233812	0.0106934	0.0336815	0.0282533	0.0458871	0.0406461	0.0452332	0.0572846	0.0561295	0.025666	0.106388	0.0533717	0.106063	0.120943	0.137287	0.115613	0.114707	0.119178	0.14198	0.183354	0.0366973	0.0458403	0.180263	0.132549	0.0490389	0.0927907	0.0561724	0.150806	0.00639087	0.0036993	0.155641	0.142623	0.0591175	0.114781	0.00132303	0.00101252	0.159093	0.0353174	0.00980686	0.0483402	0.0285228	0.0299774	0.011146	0.191695	0.00917018	0.149565
SBS7c	0.0938134	0.170612	0.0317727	0.0286563	0.0307618	0.0873129	0.0591409	0.125618	0.498374	0.110426	0.12505	0.134936	0.0639809	0.0777897	0.104873	0.0856946	0.125663	0.118974	0.136673	0.130625	0.118575	0.113625	0.140843	0.0656839	0.126541	0.0751723	0.139684	0.155653	0.127544	0.130894	0.0407671	0.0246968	0.0557173	0.0552249	0.0873974	0.226761	0.0514488	0.0192699	0.0248085	0.0254156	0.111118	0.115545	0.223061	0.125489	0.0408295	0.0697799	0.0604138	0.0530351	0.136493
SBS5	0.324771	0.440107	0.172243	0.132003	0.0925651	0.210051	0.145395	0.246762	0.292344	0.318645	0.2839	0.300291	0.273065	0.36018	0.393835	0.380468	0.410517	0.429663	0.439198	0.353493	0.340121	0.365522	0.373853	0.285825	0.321397	0.296917	0.41619	0.390325	0.26069	0.242609	0.185367	0.0974804	0.0893467	0.287973	0.365087	0.310312	0.237419	0.0939739	0.0855322	0.152369	0.324515	0.217118	0.308912	0.233446	0.123129	0.0988172	0.262439	0.0967818	0.373362
SBS7b	0.121962	0.153933	0.066167	0.0241988	0.0168363	0.0568589	0.0374919	0.0803247	0.0881761	0.158951	0.173245	0.0558306	0.068002	0.119115	0.150834	0.123586	0.149034	0.183999	0.161785	0.11552	0.100803	0.137322	0.126387	0.145301	0.0560902	0.121061	0.151641	0.0706628	0.137592	0.122906	0.0601066	0.0100701	0.0393242	0.0582218	0.0970713	0.0812153	0.040192	0.00485963	0.0102453	0.0454743	0.128267	0.138935	0.0851326	0.057882	0.0130015	0.0367448	0.0927939	0.0246911	0.144201
SBS4	0.195615	0.28534	0.0924582	0.144915	0.0496212	0.146967	0.103299	0.252577	0.135817	0.173002	0.173441	0.201197	0.163025	0.286596	0.25487	0.314532	0.264511	0.253283	0.264508	0.224798	0.24566	0.260994	0.232834	0.158789	0.216616	0.166406	0.298969	0.292265	0.162601	0.158657	0.105995	0.0528459	0.0688459	0.195475	0.248257	0.223312	0.130659	0.0600002	0.0438473	0.0947085	0.225304	0.15652	0.266841	0.182708	0.0614072	0.0800631	0.143226	0.0650873	0.270079
SBS3	0.328755	0.576043	0.130303	0.146298	0.155975	0.242829	0.152854	0.311378	0.33869	0.408298	0.359995	0.33064	0.392459	0.468012	0.449166	0.472941	0.480615	0.472305	0.481141	0.414573	0.428849	0.418717	0.383159	0.324707	0.374865	0.273958	0.501655	0.531736	0.333869	0.333126	0.157473	0.186334	0.166149	0.350777	0.420006	0.402346	0.257235	0.202272	0.161779	0.11929	0.370441	0.30161	0.381125	0.300923	0.207006	0.187906	0.222814	0.185033	0.439979
SBS6	0.211295	0.107176	0.202243	0.0350642	0.0160127	0.0455636	0.0308858	0.0800537	0.0692585	0.0750568	0.0971843	0.110667	0.0464114	0.186119	0.0955719	0.192227	0.14902	0.180812	0.161649	0.138296	0.135796	0.161071	0.206029	0.0705079	0.0777541	0.202775	0.216592	0.0726305	0.117986	0.0802498	0.159705	0.010028	0.0103598	0.175703	0.16307	0.107802	0.129023	0.00273978	0.00416875	0.163033	0.0605925	0.0290743	0.104985	0.0474972	0.0368327	0.0168846	0.214566	0.0137282	0.193859
SBS7a	0.0490009	0.0865972	0.0209272	0.0188072	0.00627578	0.0276717	0.0266686	0.0277404	0.128807	0.0767994	0.0600007	0.0239114	0.030878	0.0496509	0.103777	0.0598611	0.063403	0.0716007	0.0692614	0.0647184	0.0402211	0.0575482	0.0522319	0.0897577	0.028764	0.0441731	0.0665723	0.0394081	0.0445022	0.0400672	0.0168219	0.00283286	0.0103925	0.0202311	0.0337507	0.0318487	0.015548	0.00125894	0.00283583	0.0119531	0.0504027	0.0398148	0.0388884	0.0215478	0.00383145	0.0107558	0.0328464	0.00688082	0.0549889
SBS2	0.0196527	0.0567651	0.00528502	0.0163711	0.00195962	0.0149181	0.0202085	0.00563297	0.16817	0.0379982	0.0104844	0.0109022	0.0117763	0.0138479	0.081824	0.0318373	0.0359604	0.0270686	0.0344441	0.0341238	0.00923862	0.0241191	0.016449	0.0728867	0.0190984	0.0184753	0.0298984	0.0332363	0.00712952	0.00554769	0.00244955	0.000552778	0.000756244	0.00190049	0.00329767	0.0192438	0.00163004	0.000385854	0.000530022	0.00204024	0.0154013	0.00398029	0.0280862	0.0156069	0.000876893	0.00123802	0.013945	0.000956077	0.0220083
SBS7d	0.103897	0.204859	0.0257985	0.0323777	0.021524	0.0915781	0.0722394	0.128568	0.161724	0.109031	0.097569	0.116897	0.0968698	0.111089	0.279999	0.182122	0.165475	0.131216	0.173063	0.115882	0.109282	0.127554	0.107712	0.0896226	0.114634	0.0876225	0.203028	0.192137	0.140923	0.141979	0.0258007	0.0128077	0.0112867	0.0527573	0.0773577	0.187194	0.0464105	0.00914727	0.00853674	0.0194315	0.164376	0.0787704	0.100324	0.188992	0.0306624	0.0138313	0.0688292	0.0106978	0.215144
SBS8	0.254438	0.374352	0.0956082	0.152723	0.0633768	0.162686	0.188813	0.233091	0.26336	0.242643	0.281048	0.339283	0.196963	0.411183	0.294687	0.417788	0.302387	0.295065	0.306102	0.2808	0.265529	0.289628	0.250865	0.170065	0.373803	0.182463	0.425426	0.328106	0.270574	0.274692	0.103005	0.0623707	0.134637	0.273671	0.352638	0.290708	0.227507	0.0655005	0.0580832	0.0910064	0.238166	0.239642	0.324546	0.215979	0.0735623	0.165742	0.161509	0.120238	0.306376
SBS9	0.243298	0.419718	0.105005	0.231677	0.22803	0.159593	0.126954	0.222137	0.411569	0.296087	0.262118	0.204704	0.201881	0.191111	0.317376	0.22617	0.310968	0.332125	0.366582	0.345522	0.235971	0.27408	0.256359	0.287846	0.269654	0.203381	0.270823	0.380762	0.228892	0.226244	0.122064	0.181423	0.173379	0.146695	0.20303	0.278383	0.0986502	0.059365	0.210921	0.0936133	0.304855	0.199879	0.283746	0.204802	0.195324	0.162763	0.170805	0.195918	0.280207
SBS10c	0.176847	0.27264	0.0676923	0.114952	0.0910701	0.106055	0.0948164	0.192935	0.185587	0.221026	0.150529	0.233692	0.100987	0.14851	0.291498	0.217334	0.220492	0.223759	0.23307	0.191897	0.181009	0.212958	0.219642	0.150629	0.245203	0.141157	0.20475	0.292981	0.141213	0.139401	0.0780351	0.0689337	0.0746903	0.119435	0.174974	0.189391	0.0974306	0.024637	0.0755995	0.0614399	0.180189	0.13951	0.186408	0.205638	0.0742115	0.0759365	0.123777	0.0772674	0.211518
SBS10b	0.0375283	0.0935395	0.00885986	0.0187476	0.0107924	0.0544396	0.024317	0.0226944	0.120607	0.0867964	0.0227819	0.026801	0.0520198	0.0593324	0.113902	0.0669122	0.0629705	0.0645145	0.0924222	0.0561231	0.0393247	0.065941	0.061784	0.0673869	0.0411778	0.0366436	0.0775984	0.0889917	0.0276709	0.027731	0.00735501	0.0043624	0.0106714	0.0166341	0.0273142	0.0696093	0.0104317	0.00210998	0.00523149	0.00539587	0.0933764	0.0223551	0.0682291	0.0626824	0.00605381	0.0161847	0.0244827	0.0119187	0.0524723
SBS10d	0.0737716	0.143828	0.0171744	0.0349228	0.0288017	0.0420291	0.0371414	0.06304	0.0855187	0.116058	0.0515785	0.095216	0.028414	0.0789165	0.233351	0.152755	0.122	0.108157	0.100138	0.0816099	0.0764207	0.118806	0.103643	0.0626141	0.0798036	0.0542383	0.115979	0.198032	0.0641481	0.0661458	0.0232777	0.014713	0.0276853	0.0473206	0.0697398	0.115067	0.0247905	0.00739964	0.0175167	0.0169474	0.0752474	0.0708291	0.0983877	0.16587	0.0169651	0.030018	0.0460452	0.0245957	0.129204
SBS10a	0.0440412	0.0979404	0.004955	0.0164941	0.0137213	0.0187693	0.0232667	0.0352622	0.0572537	0.1033	0.0302272	0.0492573	0.0112443	0.0498925	0.176216	0.109307	0.0859267	0.0653419	0.0715594	0.0513496	0.0558278	0.0912703	0.0938715	0.0316834	0.0456462	0.0342921	0.0814567	0.14661	0.0435258	0.0455239	0.00903914	0.00200993	0.0217731	0.0202318	0.036488	0.0773801	0.00746752	0.00213362	0.00468966	0.009033	0.0372388	0.0597503	0.0599228	0.127175	0.00339473	0.023401	0.0337971	0.0151487	0.0783763
SBS11	0.0746544	0.116145	0.0197558	0.0120129	0.00843812	0.0271963	0.0225903	0.071225	0.0830054	0.0506698	0.124238	0.118175	0.0653912	0.123119	0.111421	0.120799	0.099269	0.123256	0.0959488	0.065455	0.145364	0.0946196	0.113682	0.0417537	0.0768734	0.0612277	0.146484	0.0748834	0.0746796	0.0711373	0.025967	0.00573164	0.0239543	0.152489	0.173691	0.0649897	0.17919	0.00211864	0.00306548	0.0107525	0.0426231	0.0848033	0.0883911	0.042719	0.00577323	0.0207892	0.0542795	0.0133606	0.0957256
SBS13	0.0587097	0.172275	0.00711836	0.0326736	0.013242	0.0430318	0.0261906	0.0576856	0.165855	0.208968	0.0400328	0.067861	0.0330495	0.0446698	0.248039	0.118449	0.109175	0.124239	0.143893	0.10514	0.0634849	0.0783827	0.0853654	0.171959	0.0577142	0.052633	0.0807382	0.20358	0.0451698	0.04626	0.0124654	0.00978862	0.0100319	0.0184942	0.0328998	0.110689	0.0109144	0.0108846	0.0057878	0.00736637	0.159466	0.0200078	0.0365275	0.0812537	0.0178404	0.00668675	0.0435616	0.00670665	0.081889
SBS14	0.0885771	0.153292	0.0351789	0.0400243	0.0150884	0.0449563	0.0301426	0.31462	0.0817416	0.0901814	0.0575631	0.109623	0.0732283	0.150408	0.150593	0.191747	0.121642	0.10425	0.11936	0.0877408	0.113805	0.128886	0.128816	0.0644031	0.109381	0.0680483	0.166725	0.168751	0.0630973	0.0630718	0.0311352	0.00965452	0.0184521	0.076224	0.110565	0.110107	0.0597847	0.0100583	0.00633408	0.0257182	0.107336	0.0698127	0.162767	0.113431	0.0146815	0.0195711	0.0625095	0.0140913	0.129311
SBS15	0.0754918	0.110714	0.0454535	0.0339192	0.0125161	0.032589	0.0327745	0.0598271	0.0636454	0.0790748	0.0540186	0.055731	0.0500314	0.138637	0.113109	0.157411	0.0877042	0.0992058	0.122883	0.0833091	0.131352	0.0892455	0.129947	0.088644	0.0654231	0.0659012	0.136914	0.0867402	0.056764	0.0509307	0.0374018	0.0073164	0.0100576	0.125006	0.0980177	0.123061	0.0500023	0.00408129	0.00513417	0.0335044	0.0755931	0.0349624	0.13871	0.0734143	0.0435773	0.014761	0.0711085	0.0117549	0.23822
SBS17a	0.158748	0.160333	0.0936993	0.0317066	0.0147698	0.0443867	0.0148088	0.560854	0.0562402	0.0963009	0.286886	0.0891096	0.0312286	0.0588394	0.111341	0.140277	0.183988	0.215291	0.20522	0.152802	0.150659	0.188994	0.206917	0.0436674	0.0572149	0.10162	0.10564	0.163598	0.383825	0.398324	0.154678	0.0125908	0.0907851	0.060868	0.113736	0.120468	0.012529	0.0129984	0.0121744	0.104245	0.0505887	0.406784	0.0911438	0.118499	0.0254068	0.120145	0.130397	0.063546	0.273324
SBS17b	0.0917823	0.224295	0.0218796	0.456022	0.293057	0.0586984	0.0127253	0.034111	0.10188	0.192925	0.163671	0.0212731	0.058745	0.0194576	0.0537435	0.0199178	0.0980526	0.162454	0.211995	0.296975	0.0311068	0.0565948	0.0393655	0.278355	0.129812	0.0810561	0.0636412	0.14256	0.106738	0.109131	0.0131119	0.203407	0.2012	0.0164763	0.0211888	0.114259	0.00311716	0.00451584	0.268155	0.0115271	0.212682	0.0450895	0.0476154	0.0508676	0.19107	0.174731	0.0437692	0.233364	0.0534502
SBS18	0.157183	0.255941	0.065857	0.283912	0.0333907	0.115618	0.0656917	0.134934	0.148403	0.168577	0.0999791	0.173841	0.0811526	0.242036	0.273801	0.321217	0.190338	0.206695	0.223714	0.165634	0.163895	0.186504	0.182084	0.176458	0.179262	0.136453	0.266207	0.247834	0.101613	0.0946167	0.0600068	0.0233063	0.0356405	0.130512	0.155407	0.193411	0.086696	0.0198801	0.0211012	0.0514045	0.215088	0.0889226	0.15819	0.176454	0.0365056	0.0394891	0.110346	0.0336155	0.206988
SBS20	0.109211	0.138641	0.0647717	0.0439208	0.0185136	0.0742434	0.0383136	0.385376	0.0845501	0.0656412	0.0849416	0.123952	0.0973435	0.106899	0.0790358	0.101744	0.132569	0.130094	0.136672	0.111684	0.151927	0.135525	0.15708	0.0659748	0.116869	0.0989627	0.132913	0.145102	0.0761499	0.0719066	0.0743281	0.0203682	0.0203071	0.116044	0.155261	0.102677	0.0929006	0.0151919	0.0151256	0.0611003	0.109556	0.0794396	0.19584	0.0705309	0.0242358	0.0240307	0.092374	0.0197223	0.153011
SBS21	0.125406	0.265428	0.0444684	0.0796245	0.0218974	0.114113	0.0868501	0.121079	0.102436	0.241667	0.0866984	0.0666929	0.110611	0.089831	0.415386	0.206128	0.23274	0.210623	0.260387	0.185648	0.158623	0.187936	0.167882	0.289584	0.130305	0.103064	0.180185	0.242018	0.137245	0.140494	0.0404604	0.00783975	0.00811411	0.0548031	0.0662989	0.282274	0.0187022	0.00637251	0.00329777	0.0307284	0.286565	0.0755352	0.0859527	0.286676	0.0482371	0.013994	0.0989016	0.0131702	0.204414
SBS22	0.247083	0.191725	0.175039	0.0499413	0.0603711	0.097839	0.206392	0.101026	0.176872	0.149769	0.281009	0.186792	0.101118	0.107932	0.133848	0.0996243	0.276124	0.235132	0.223567	0.270789	0.237762	0.302317	0.212765	0.0622486	0.200438	0.210567	0.183983	0.199614	0.277302	0.268516	0.211216	0.0496591	0.193501	0.153619	0.198325	0.174389	0.081705	0.0360846	0.0633353	0.218592	0.0871678	0.248708	0.156872	0.133436	0.0504685	0.227733	0.206381	0.1585	0.217447
SBS24	0.147425	0.254007	0.0544337	0.211971	0.0424619	0.10909	0.0520151	0.115302	0.12135	0.123979	0.134598	0.17553	0.101705	0.315355	0.243559	0.40001	0.176213	0.196521	0.227008	0.153371	0.160792	0.156744	0.151374	0.156793	0.161894	0.116136	0.314118	0.215222	0.113852	0.111395	0.0520891	0.0335289	0.0303751	0.176595	0.170758	0.228545	0.105706	0.0299434	0.0277711	0.0407831	0.200461	0.0810383	0.236875	0.15689	0.0493315	0.0358918	0.100337	0.0340703	0.215677
SBS26	0.229943	0.285495	0.147026	0.0711728	0.0410564	0.174701	0.0771621	0.250687	0.130152	0.212193	0.204996	0.132896	0.146303	0.114501	0.352542	0.203256	0.324298	0.31456	0.354916	0.27826	0.25563	0.295072	0.315462	0.224908	0.167256	0.22231	0.181963	0.298701	0.226797	0.21913	0.190317	0.0320362	0.0461135	0.0888544	0.155435	0.258621	0.0291572	0.0202579	0.0295947	0.15153	0.27039	0.219291	0.167913	0.263581	0.0667051	0.0540568	0.21834	0.044056	0.307784
SBS29	0.157896	0.250372	0.0672683	0.271946	0.0335399	0.120401	0.0540001	0.155532	0.112455	0.128368	0.105742	0.186793	0.101277	0.316317	0.234985	0.389773	0.169059	0.199409	0.220397	0.151624	0.161223	0.160959	0.163809	0.17256	0.182442	0.127734	0.309662	0.214707	0.0954387	0.0890208	0.0557938	0.028529	0.0174838	0.166581	0.184942	0.188884	0.11614	0.0339489	0.0196623	0.0479928	0.221279	0.0695516	0.191488	0.134568	0.0430854	0.0221129	0.108475	0.0220076	0.205219
SBS28	0.059884	0.15809	0.015753	0.0965261	0.0861005	0.0282331	0.0295987	0.0359106	0.254409	0.17133	0.0637775	0.0367487	0.0990768	0.0256514	0.127904	0.0219391	0.0691652	0.100491	0.164894	0.117151	0.0345317	0.0647709	0.0456096	0.188645	0.0706895	0.0407419	0.0566175	0.128533	0.0383361	0.038621	0.0147685	0.0610655	0.0696261	0.0225912	0.0320426	0.108656	0.0097302	0.00942767	0.0791341	0.0110667	0.141437	0.0216149	0.106758	0.0543956	0.062231	0.0598837	0.0352801	0.0754421	0.0659531
SBS30	0.136834	0.175047	0.0603749	0.0328486	0.0174544	0.0480209	0.0368087	0.0957409	0.131285	0.171804	0.173914	0.155096	0.0691637	0.149351	0.164273	0.156939	0.15416	0.209159	0.172679	0.122691	0.139974	0.141395	0.155485	0.188805	0.100851	0.115689	0.2052	0.0827602	0.120969	0.107575	0.0563622	0.0119936	0.0259624	0.164945	0.190429	0.0907019	0.18187	0.00607935	0.00931382	0.0412316	0.118225	0.0976156	0.0719894	0.0414146	0.0141324	0.0242849	0.104669	0.0169462	0.152999
SBS31	0.195326	0.261366	0.0909882	0.0624086	0.038325	0.110169	0.0773855	0.194748	0.119826	0.223935	0.316783	0.126615	0.128096	0.220511	0.213107	0.226355	0.269462	0.282967	0.269632	0.205169	0.183074	0.231786	0.188636	0.162384	0.138816	0.181503	0.266164	0.183063	0.281937	0.274323	0.0988462	0.0281791	0.112776	0.138427	0.206569	0.166716	0.0904714	0.0232915	0.0300731	0.0760327	0.184891	0.299413	0.185253	0.132412	0.0353746	0.124924	0.146389	0.0838966	0.261853
SBS32	0.139912	0.188144	0.0486949	0.0442269	0.0162998	0.0714077	0.0428218	0.128176	0.122098	0.100382	0.144569	0.263653	0.0846701	0.224445	0.174054	0.228988	0.158071	0.201782	0.163384	0.120051	0.213188	0.148842	0.185626	0.10073	0.179531	0.106555	0.266514	0.142257	0.0977886	0.09118	0.0516391	0.0128801	0.0157053	0.279792	0.303035	0.119854	0.355768	0.00776209	0.00690321	0.0323163	0.0982236	0.0579595	0.104024	0.0778443	0.018325	0.0171204	0.103179	0.0127672	0.167323
SBS36	0.103647	0.198752	0.0313431	0.143995	0.023559	0.071509	0.0496111	0.131413	0.110917	0.137749	0.0672383	0.125539	0.0520732	0.146492	0.265529	0.233894	0.156189	0.148803	0.16365	0.117164	0.115491	0.151537	0.136195	0.110913	0.122956	0.0847841	0.180905	0.23831	0.0764025	0.0764561	0.0341271	0.0123289	0.0259508	0.0771405	0.102183	0.157694	0.0421643	0.0122369	0.0110655	0.0251175	0.139878	0.0837275	0.133177	0.187113	0.0198992	0.0296951	0.0664854	0.0223155	0.175171
SBS35	0.245389	0.320164	0.126691	0.0812127	0.0759885	0.117997	0.0779794	0.2934	0.148493	0.235876	0.3648	0.177427	0.191889	0.282003	0.233612	0.280849	0.330751	0.299947	0.30117	0.282978	0.25895	0.310887	0.229782	0.148142	0.19104	0.202133	0.320462	0.28483	0.351056	0.350633	0.144555	0.0731891	0.188722	0.172804	0.254967	0.222684	0.0976931	0.0727347	0.0732774	0.135448	0.18031	0.336363	0.275033	0.189159	0.0759254	0.2186	0.177325	0.156723	0.288219
SBS38	0.0399255	0.087065	0.0119324	0.0310715	0.0136498	0.044467	0.030903	0.179133	0.0435305	0.0445556	0.0303022	0.0348111	0.0734926	0.0695505	0.0644018	0.0656721	0.0835629	0.0615092	0.0734867	0.0652133	0.104115	0.0864598	0.0880773	0.0413751	0.0692038	0.0382827	0.0568297	0.1189	0.0330661	0.0361342	0.0151498	0.0152634	0.0129601	0.0501502	0.0811514	0.0653093	0.0237549	0.0119238	0.0106338	0.0116353	0.0916718	0.0547482	0.130995	0.0555436	0.0217508	0.0121331	0.0277285	0.0120138	0.0773827
SBS42	0.140474	0.209786	0.0572554	0.0627725	0.0412917	0.0769515	0.0786894	0.135517	0.115031	0.121766	0.162417	0.170932	0.121311	0.220462	0.184744	0.242393	0.182481	0.187133	0.19789	0.137129	0.15696	0.157149	0.150794	0.100672	0.160417	0.116694	0.257223	0.179387	0.123834	0.119704	0.0654727	0.0406905	0.0506593	0.166366	0.20043	0.157211	0.136054	0.0400487	0.0356571	0.0497685	0.122713	0.124531	0.204644	0.122729	0.0459653	0.052185	0.0967868	0.0453802	0.176575
SBS44	0.177713	0.204542	0.0995552	0.041862	0.0229133	0.120513	0.0673518	0.254451	0.156638	0.124587	0.126192	0.25395	0.0995992	0.183294	0.17768	0.210623	0.187908	0.206934	0.21587	0.159587	0.195521	0.183198	0.221907	0.117597	0.196092	0.155414	0.234562	0.184442	0.105833	0.0952666	0.112206	0.0206411	0.0217174	0.197601	0.220173	0.184351	0.181802	0.0150679	0.0142611	0.093529	0.15225	0.0768196	0.184886	0.116512	0.0355955	0.0265082	0.156463	0.0212915	0.216926
SBS85	0.148243	0.259807	0.0230299	0.0518822	0.0519025	0.124369	0.432555	0.111497	0.380435	0.185682	0.110177	0.290333	0.155046	0.151179	0.21243	0.153942	0.165925	0.17519	0.225233	0.146732	0.191817	0.149529	0.160405	0.122084	0.389524	0.0957538	0.199856	0.235828	0.109955	0.116647	0.033023	0.0539151	0.0356213	0.168265	0.21488	0.22624	0.183311	0.0514246	0.0462184	0.0138631	0.204117	0.0995364	0.208933	0.147546	0.0718506	0.0441179	0.0880127	0.0436923	0.184058
SBS84	0.0945205	0.164558	0.0259995	0.034083	0.0247669	0.0442692	0.0330028	0.0796221	0.107999	0.0925445	0.111346	0.155621	0.110922	0.275367	0.115076	0.251843	0.114526	0.133811	0.120031	0.0724059	0.125113	0.0957004	0.104332	0.0731797	0.127223	0.0678552	0.262178	0.111788	0.0774507	0.075361	0.0330351	0.0255183	0.0184021	0.195299	0.1852	0.14153	0.169893	0.0309942	0.0196592	0.0146192	0.0813025	0.0575868	0.169871	0.0551754	0.0290619	0.0206447	0.0651317	0.0207821	0.115931
SBS87	0.372361	0.151269	0.379082	0.0666417	0.0555764	0.0823786	0.0734845	0.122665	0.119489	0.126858	0.145564	0.119722	0.0916545	0.21466	0.127584	0.214422	0.264571	0.295015	0.235699	0.235121	0.171445	0.280235	0.297523	0.0856459	0.11377	0.36154	0.269488	0.134891	0.217741	0.150854	0.293067	0.0655449	0.0361009	0.173985	0.201032	0.125382	0.131165	0.0677586	0.0487112	0.301084	0.107592	0.0676574	0.0979299	0.0844898	0.0720282	0.0488946	0.363277	0.0520071	0.148311
SBS88	0.085745	0.193201	0.0120813	0.0306619	0.0262578	0.0655842	0.17323	0.0541597	0.354867	0.152576	0.0548006	0.146938	0.189679	0.132372	0.148243	0.0893341	0.126787	0.117627	0.165097	0.115013	0.111631	0.109074	0.0985166	0.111847	0.233599	0.0650794	0.124394	0.194069	0.0368979	0.041223	0.0180106	0.0298866	0.0150509	0.0982232	0.140451	0.163292	0.0909004	0.0344688	0.0224189	0.00770997	0.164867	0.0494585	0.22101	0.0868847	0.0429827	0.0174716	0.0629402	0.0202288	0.11053
SBS90	0.0673394	0.124719	0.0141132	0.0398816	0.0372605	0.0421325	0.107901	0.0479869	0.276751	0.0920283	0.116636	0.0884187	0.0443423	0.0603685	0.0793076	0.0634064	0.0688576	0.069916	0.0948094	0.0963513	0.0588679	0.0515074	0.0638686	0.0415499	0.109079	0.0331383	0.0975504	0.0921003	0.127277	0.136643	0.0107388	0.0275332	0.0772699	0.0516481	0.0761443	0.112486	0.0383794	0.0140593	0.033125	0.00830995	0.058921	0.120121	0.114491	0.0745919	0.0307234	0.0930964	0.0234529	0.0667339	0.0797358
SBS92	0.253647	0.374557	0.119941	0.0960147	0.0488535	0.168544	0.129137	0.223191	0.210638	0.329371	0.258491	0.22303	0.206048	0.286029	0.370589	0.322242	0.348209	0.372415	0.383934	0.281183	0.259254	0.29474	0.279763	0.299674	0.26551	0.235565	0.330124	0.318415	0.234821	0.224589	0.133735	0.0453566	0.0565659	0.199486	0.282908	0.253374	0.149312	0.0492199	0.037236	0.104082	0.328037	0.214771	0.237952	0.181435	0.061767	0.0634659	0.202459	0.0492179	0.320747
SBS45	0.0451527	0.10627	0.0130577	0.0271383	0.0101429	0.055356	0.0327743	0.232988	0.0474513	0.0488383	0.0277332	0.0411819	0.0806785	0.0681597	0.102577	0.0779367	0.108592	0.0756477	0.093967	0.0807608	0.122764	0.107094	0.113829	0.0390338	0.0713985	0.0427077	0.0681879	0.163889	0.0362704	0.0406416	0.0203028	0.011946	0.010144	0.055305	0.0934187	0.0884278	0.0204171	0.0142182	0.00662368	0.0136412	0.106069	0.0637383	0.160843	0.100065	0.0188541	0.0106535	0.0291595	0.00897843	0.120126
SBS54	0.268372	0.146859	0.25567	0.0345585	0.0350482	0.221722	0.0388771	0.136594	0.0476404	0.0708468	0.148616	0.132035	0.0693859	0.07346	0.163969	0.118886	0.264921	0.27151	0.274423	0.251718	0.237161	0.286461	0.37832	0.0784327	0.086656	0.313284	0.127597	0.170603	0.144313	0.107437	0.29636	0.0376238	0.057752	0.0694438	0.121383	0.141024	0.0226945	0.0188407	0.0358308	0.272054	0.13978	0.111385	0.109639	0.172837	0.0687174	0.0580004	0.283491	0.0549746	0.210661
SBS12	0.169165	0.264418	0.0807	0.0545705	0.0264464	0.198422	0.0832685	0.22	0.14131	0.190606	0.183246	0.111606	0.144561	0.123378	0.310209	0.193777	0.27692	0.264157	0.298284	0.216447	0.247722	0.243408	0.252528	0.191519	0.164335	0.167842	0.162566	0.269188	0.207018	0.210994	0.116021	0.0212613	0.0340673	0.0882476	0.148853	0.230824	0.035545	0.0221954	0.0152906	0.0812191	0.265649	0.230231	0.175006	0.214513	0.0570519	0.0445577	0.149613	0.0311266	0.276525
SBS19	0.132097	0.180661	0.0657749	0.0338309	0.0237069	0.0636332	0.0376714	0.0909669	0.0903209	0.188211	0.18975	0.0724916	0.0697321	0.195062	0.152551	0.195431	0.171464	0.207871	0.186909	0.12182	0.0889865	0.128627	0.115054	0.166465	0.0756673	0.131975	0.229042	0.0818699	0.160687	0.14714	0.0573555	0.0148909	0.0338638	0.0818879	0.124734	0.0941012	0.0600958	0.0100665	0.0148359	0.0408234	0.148324	0.124668	0.114728	0.0486972	0.0197989	0.0332522	0.0980267	0.023592	0.16715
SBS16	0.0932704	0.183907	0.0274279	0.0391179	0.0330188	0.0657878	0.100806	0.0875398	0.123031	0.165929	0.0817282	0.0931581	0.186741	0.168176	0.142446	0.127642	0.158011	0.142285	0.176202	0.133166	0.101695	0.118617	0.102305	0.123934	0.183108	0.0925238	0.126281	0.190116	0.0768719	0.0802758	0.0345008	0.0375653	0.0260678	0.0942199	0.150996	0.10282	0.0622818	0.0439015	0.0311504	0.0235943	0.172632	0.0846685	0.161673	0.0691539	0.0465849	0.0295279	0.0690942	0.0290714	0.12271
SBS25	0.400357	0.440103	0.239494	0.161961	0.0898099	0.191386	0.195313	0.254263	0.325603	0.353824	0.364259	0.367896	0.207681	0.307018	0.391882	0.353042	0.483094	0.467332	0.462747	0.458071	0.386183	0.472742	0.391092	0.263507	0.367446	0.337429	0.423347	0.418834	0.373717	0.353486	0.269424	0.0807811	0.181942	0.278678	0.347281	0.359675	0.186969	0.0577594	0.0846664	0.255538	0.301764	0.283991	0.28983	0.274213	0.0943957	0.206105	0.324906	0.155709	0.416454
SBS23	0.113655	0.149254	0.0540806	0.0223141	0.0147935	0.0443941	0.0254804	0.080241	0.0555791	0.124056	0.180132	0.0794204	0.069763	0.171581	0.13032	0.174142	0.147786	0.178898	0.154383	0.0916116	0.11727	0.123133	0.120157	0.104991	0.0613628	0.110444	0.20182	0.0754122	0.135552	0.124058	0.0514329	0.00706939	0.0390252	0.117887	0.149603	0.0868888	0.0952444	0.00209628	0.00644746	0.0354104	0.0969904	0.141471	0.113262	0.0528805	0.0102054	0.034797	0.0895111	0.0221437	0.146151
SBS33	0.102174	0.180137	0.0504072	0.0266144	0.0113893	0.527394	0.0369151	0.0607391	0.0672337	0.0659928	0.0707505	0.0492223	0.0510491	0.0471	0.161229	0.0894098	0.191593	0.191424	0.206426	0.122778	0.29514	0.154303	0.256974	0.0580225	0.0612102	0.2214	0.0882584	0.161627	0.0777831	0.0753263	0.062497	0.0104255	0.0185658	0.053108	0.0779766	0.155496	0.0204037	0.00829116	0.00589376	0.0478456	0.271678	0.0811924	0.0821139	0.224092	0.0796791	0.0139819	0.0862599	0.0149714	0.14935
SBS37	0.171899	0.314531	0.0585925	0.0618631	0.0392935	0.164954	0.0962757	0.253637	0.234295	0.240254	0.197109	0.156144	0.202124	0.210772	0.310084	0.230654	0.290941	0.2734	0.30747	0.242674	0.252619	0.233483	0.215655	0.188384	0.207343	0.152811	0.229541	0.338201	0.214244	0.223784	0.0926175	0.0309545	0.0471484	0.183497	0.248458	0.243489	0.123181	0.0251252	0.0309072	0.049892	0.273665	0.230079	0.262137	0.223779	0.0536445	0.062298	0.140386	0.0460413	0.312498
SBS34	0.109082	0.112251	0.0234124	0.0311171	0.0286206	0.0298083	0.246076	0.0469863	0.223051	0.1013	0.064135	0.343859	0.0628324	0.0585137	0.0475978	0.0467152	0.0489815	0.0840959	0.0836828	0.0446551	0.0792988	0.0531981	0.0821681	0.0443305	0.353199	0.050559	0.0673776	0.0767511	0.022428	0.0217213	0.0291545	0.0396387	0.0110477	0.133756	0.173827	0.0616652	0.173995	0.0343076	0.0299434	0.0169432	0.0573902	0.0250341	0.0961974	0.0323321	0.03206	0.0181859	0.0505719	0.0179648	0.0679794
SBS39	0.250503	0.469171	0.0947884	0.111299	0.162304	0.186587	0.130166	0.183541	0.297738	0.369678	0.20554	0.275937	0.427564	0.423937	0.351813	0.383605	0.357454	0.3577	0.353277	0.317535	0.371263	0.306159	0.300917	0.276533	0.311378	0.206739	0.414677	0.473382	0.204612	0.203603	0.118227	0.227069	0.100434	0.377857	0.378454	0.342969	0.283893	0.290588	0.180344	0.0816812	0.290612	0.147022	0.298455	0.219763	0.245521	0.119749	0.16937	0.153624	0.32378
SBS40	0.28268	0.527674	0.0968989	0.185081	0.122451	0.212786	0.143838	0.269386	0.405074	0.388445	0.291174	0.32669	0.298917	0.403079	0.453622	0.431629	0.394223	0.422494	0.453038	0.358021	0.334315	0.347346	0.332519	0.350015	0.353282	0.234181	0.444994	0.465623	0.255437	0.25342	0.117811	0.12463	0.113802	0.292221	0.372515	0.352714	0.240041	0.117683	0.115415	0.0812804	0.363601	0.229948	0.3745	0.26104	0.14481	0.123571	0.19138	0.12511	0.388455
SBS41	0.160106	0.279461	0.0578306	0.0733783	0.0582289	0.152112	0.111827	0.117545	0.524065	0.254065	0.129327	0.240836	0.141045	0.134288	0.237725	0.148854	0.185899	0.220587	0.261135	0.184829	0.18697	0.165634	0.189976	0.211562	0.247111	0.135931	0.170862	0.241969	0.106036	0.102941	0.0679155	0.0530686	0.047459	0.118366	0.157607	0.216137	0.111074	0.0358916	0.0494196	0.0488776	0.246898	0.0869297	0.212072	0.125834	0.0666732	0.0525562	0.111438	0.0522317	0.181192
SBS86	0.131141	0.282639	0.0317088	0.0521237	0.0824084	0.0991837	0.0734145	0.0856671	0.18968	0.280501	0.0917292	0.182363	0.271308	0.297785	0.215893	0.241031	0.192547	0.207965	0.20342	0.162797	0.243199	0.164059	0.175561	0.205683	0.19057	0.102295	0.240059	0.290173	0.0962778	0.0986838	0.0516854	0.121032	0.0248052	0.292282	0.274679	0.201015	0.249626	0.172628	0.0889897	0.0218681	0.182748	0.0437567	0.161138	0.111326	0.137275	0.0402947	0.0878802	0.0641405	0.176228
SBS91	0.0611381	0.131692	0.0182881	0.0243047	0.0104334	0.0842925	0.0220432	0.0410148	0.063237	0.0788404	0.0420626	0.0721221	0.0315491	0.0564442	0.214455	0.106428	0.148255	0.137658	0.132769	0.114914	0.0675278	0.0986231	0.10514	0.0918918	0.0479687	0.0498914	0.0818119	0.194694	0.0481885	0.0488273	0.0295683	0.0037246	0.00881221	0.0575474	0.0714317	0.11743	0.0284698	0.00413682	0.00472738	0.0122582	0.089388	0.0362346	0.0844405	0.204248	0.00884905	0.00983347	0.0304946	0.00667458	0.176957
SBS89	0.322498	0.469794	0.142966	0.116709	0.124895	0.248257	0.157888	0.241486	0.289032	0.325882	0.327351	0.385343	0.285487	0.372076	0.384747	0.373511	0.489272	0.422461	0.415925	0.402539	0.418934	0.41669	0.369154	0.250262	0.354279	0.274257	0.442757	0.480434	0.288503	0.283905	0.174653	0.141718	0.160516	0.355535	0.435122	0.325882	0.311481	0.141515	0.126623	0.148647	0.283646	0.250838	0.293414	0.333199	0.149833	0.18113	0.230179	0.162432	0.425065
SBS93	0.199642	0.37144	0.0681924	0.16657	0.140093	0.176074	0.118337	0.177552	0.395388	0.307197	0.243558	0.191974	0.187444	0.217977	0.300061	0.232533	0.270263	0.300189	0.342201	0.294216	0.234225	0.227142	0.219105	0.277541	0.253778	0.160805	0.265957	0.313347	0.221001	0.225231	0.0794604	0.112953	0.132464	0.178501	0.228002	0.251918	0.135129	0.056458	0.126708	0.0557627	0.286396	0.188575	0.238855	0.162161	0.122888	0.14004	0.13063	0.140215	0.246047
SBS94	0.240309	0.335842	0.119691	0.109008	0.06869	0.1412	0.128747	0.298325	0.221108	0.216722	0.238171	0.22977	0.227109	0.298597	0.27648	0.312923	0.300041	0.302547	0.309191	0.256063	0.278063	0.273653	0.278071	0.176398	0.260489	0.198903	0.319061	0.332769	0.233627	0.228135	0.125522	0.0773949	0.0772511	0.230775	0.306176	0.243824	0.172664	0.0875851	0.0621117	0.102611	0.238232	0.217115	0.308838	0.175796	0.0981961	0.0916914	0.177141	0.079586	0.318509
SBS27	0.130308	0.169101	0.0457184	0.0637744	0.0481567	0.0868732	0.259988	0.0626218	0.111785	0.142154	0.201711	0.151422	0.0726225	0.0917528	0.12793	0.102087	0.118036	0.134219	0.179724	0.132363	0.151888	0.0937298	0.120223	0.0710111	0.210098	0.0834472	0.149265	0.156283	0.181847	0.194081	0.0307114	0.0367188	0.128802	0.1346	0.163032	0.119839	0.0915105	0.029384	0.0472807	0.0290294	0.0840684	0.232951	0.0646315	0.089854	0.0355285	0.156355	0.0595891	0.10513	0.14927
SBS51	0.214238	0.259688	0.0846251	0.0889971	0.0488344	0.222731	0.382366	0.136115	0.176829	0.1747	0.151979	0.326563	0.104254	0.261946	0.206058	0.271677	0.242108	0.257107	0.267183	0.197989	0.267955	0.221579	0.231728	0.152293	0.357655	0.162407	0.257678	0.22716	0.157142	0.152624	0.094036	0.053857	0.0459798	0.243732	0.290804	0.190419	0.238079	0.049397	0.0454253	0.069304	0.214735	0.160865	0.151222	0.197362	0.0749328	0.0504287	0.143327	0.0481001	0.295917
SBS47	0.125787	0.196649	0.0250639	0.0666143	0.0315896	0.136517	0.381554	0.0606686	0.280905	0.148033	0.0721195	0.255888	0.089852	0.156987	0.144409	0.143785	0.124162	0.152244	0.193585	0.147023	0.13572	0.104946	0.115007	0.112002	0.31945	0.091627	0.154382	0.166769	0.0520196	0.0522256	0.0304548	0.0385155	0.019784	0.150749	0.186281	0.147151	0.173467	0.0389343	0.030806	0.0164277	0.174838	0.0639669	0.125854	0.136687	0.0496359	0.0223308	0.0824087	0.0232944	0.152096
SBS52	0.0572139	0.116415	0.018158	0.0306687	0.0126655	0.0566047	0.0257516	0.0512589	0.0492498	0.0609434	0.0301411	0.0702702	0.0304096	0.055991	0.198408	0.111245	0.116997	0.10801	0.0940682	0.0845958	0.0634748	0.0936596	0.0711481	0.0667487	0.0485079	0.0430701	0.0774324	0.175504	0.0456194	0.0469372	0.0262578	0.00645691	0.00845854	0.0526116	0.0637229	0.111472	0.0185472	0.00646793	0.00602144	0.0130657	0.080423	0.0386327	0.0856634	0.167698	0.01088	0.0112697	0.0282932	0.00858224	0.152121
SBS50	0.123565	0.214292	0.0362167	0.0929211	0.0164122	0.156529	0.0598661	0.0633409	0.146208	0.127478	0.100558	0.173612	0.0900783	0.354286	0.191281	0.331032	0.153866	0.170178	0.172434	0.155423	0.153925	0.143336	0.136021	0.151678	0.171421	0.100745	0.284301	0.152991	0.0750409	0.0715975	0.0301501	0.0119438	0.0148925	0.182499	0.20217	0.166806	0.165961	0.00796715	0.00976104	0.0218742	0.188505	0.0736856	0.177489	0.127968	0.0231236	0.0176235	0.0860532	0.0141335	0.182907
SBS43	0.116942	0.18776	0.0564615	0.0401251	0.0283546	0.160892	0.0702124	0.123553	0.182425	0.106242	0.129285	0.0954098	0.0888419	0.12213	0.163838	0.130892	0.305631	0.161819	0.180632	0.240421	0.211832	0.204142	0.188905	0.0788742	0.109465	0.119063	0.106458	0.293312	0.125326	0.129674	0.0855329	0.0365109	0.073059	0.106308	0.114324	0.238203	0.0339937	0.0139804	0.0419468	0.0493693	0.156005	0.185682	0.19006	0.400417	0.0667991	0.06863	0.0857009	0.0604848	0.333779
SBS49	0.0155154	0.0344437	0.00364608	0.012905	0.00261703	0.0267429	0.0113239	0.0400881	0.0122671	0.0170522	0.00805359	0.0172307	0.0252617	0.0341773	0.0339763	0.0343259	0.0556362	0.0428064	0.0386753	0.0483509	0.152739	0.0621046	0.128523	0.0189577	0.027849	0.0153692	0.0235384	0.0496636	0.00965862	0.0106549	0.00517406	0.00528187	0.00379451	0.0416099	0.0572508	0.0419105	0.0118267	0.00298037	0.00111009	0.00312847	0.107263	0.022111	0.0504383	0.0392094	0.00808418	0.00164646	0.0123314	0.00161735	0.0533787
SBS48	0.0252707	0.0759329	0.00640977	0.00430445	0.0017846	0.0917712	0.00856807	0.0167299	0.031344	0.0306429	0.0152071	0.0275696	0.0293151	0.00761958	0.120381	0.0232809	0.121157	0.100308	0.112531	0.104707	0.0731833	0.0613172	0.114271	0.0470867	0.0168749	0.0275204	0.0129135	0.141116	0.0208469	0.0229751	0.0201993	0.0013946	0.00588383	0.0347204	0.0420437	0.0791554	0.00670187	0.00341372	0.0018351	0.00399203	0.0747791	0.0142639	0.048949	0.172552	0.00603647	0.00342639	0.0110346	0.00203829	0.132333
SBS46	0.25343	0.310659	0.145609	0.0726543	0.0308421	0.168461	0.0763574	0.428719	0.152841	0.191132	0.296513	0.168803	0.125626	0.155588	0.338748	0.265364	0.348552	0.343419	0.36407	0.27501	0.303957	0.329773	0.362544	0.176445	0.159557	0.22434	0.234984	0.320761	0.34936	0.346701	0.199322	0.024015	0.0616644	0.124523	0.194711	0.25617	0.0628411	0.0199723	0.0180594	0.146219	0.238713	0.377765	0.189593	0.257792	0.0640987	0.0788526	0.218528	0.0499205	0.418396
SBS53	0.0729974	0.105022	0.0385487	0.0212656	0.0183989	0.0587698	0.0439242	0.0495639	0.0565874	0.0787211	0.063112	0.0527535	0.0767598	0.123938	0.0911308	0.117095	0.110523	0.0998699	0.105163	0.0909305	0.11972	0.111263	0.111987	0.0730399	0.0806929	0.067429	0.0961502	0.117905	0.0641769	0.0627055	0.0374867	0.018966	0.0233215	0.0913845	0.0988715	0.115928	0.04384	0.0138018	0.0144156	0.0328268	0.110127	0.0659244	0.139323	0.0685812	0.0269748	0.0277436	0.0573132	0.0231398	0.0903709
SBS55	0.107724	0.1315	0.074692	0.0191837	0.0382375	0.1032	0.0428606	0.0525513	0.144472	0.0799498	0.0704545	0.0686846	0.0798926	0.0585792	0.120873	0.0553744	0.269358	0.118061	0.110297	0.188016	0.162592	0.187095	0.13818	0.0610537	0.069687	0.114195	0.0857305	0.202927	0.0612235	0.0534421	0.0816633	0.0568323	0.0895537	0.0732421	0.0922798	0.149986	0.0203398	0.0207002	0.0684324	0.0689293	0.0723865	0.0625038	0.162383	0.322204	0.0559146	0.0747556	0.0747343	0.0736093	0.227085
SBS56	0.0747253	0.137174	0.0210868	0.025037	0.0238548	0.0322588	0.0354514	0.0932676	0.080022	0.119508	0.0451985	0.0965857	0.0323207	0.0787841	0.218803	0.145084	0.11714	0.101518	0.0965198	0.0749571	0.0760337	0.12074	0.107997	0.0570207	0.0840706	0.0546444	0.114036	0.19004	0.0590829	0.0598467	0.0249046	0.0122813	0.0252344	0.0456538	0.0712426	0.103893	0.0284903	0.00803461	0.0137085	0.0206639	0.0660307	0.0683482	0.0968191	0.154853	0.0127237	0.0273486	0.050376	0.021163	0.119668
SBS57	0.120071	0.213482	0.0450599	0.039422	0.0266665	0.132723	0.0634446	0.130227	0.326671	0.186529	0.122117	0.138138	0.10785	0.1333	0.186018	0.138961	0.159896	0.187573	0.214354	0.137376	0.19084	0.14939	0.150432	0.157779	0.136546	0.105401	0.16447	0.184244	0.120145	0.119738	0.0546886	0.0205336	0.036175	0.121582	0.148546	0.187832	0.108465	0.0184087	0.0192478	0.0351567	0.220905	0.104013	0.143694	0.0983513	0.0292032	0.044842	0.0960746	0.033113	0.168632
SBS58	0.146619	0.235253	0.0454718	0.0473604	0.0216049	0.136991	0.121163	0.133064	0.243286	0.191092	0.145466	0.221985	0.113076	0.201806	0.20815	0.197006	0.20143	0.208828	0.225455	0.17342	0.155103	0.160994	0.153246	0.154986	0.206988	0.127439	0.219643	0.20086	0.132863	0.132037	0.0516927	0.0181853	0.0407801	0.177986	0.207759	0.17867	0.173421	0.0200325	0.0154706	0.0358861	0.197472	0.116286	0.154995	0.144491	0.0279053	0.0554327	0.105929	0.0377551	0.197326
SBS59	0.0735358	0.116589	0.0226761	0.147621	0.0273258	0.0223121	0.0189713	0.0452593	0.0905032	0.0712319	0.0541291	0.136157	0.0255927	0.13489	0.0988628	0.204967	0.0442655	0.0729325	0.0852888	0.0605278	0.0231403	0.0282152	0.0237103	0.0842188	0.109513	0.0502598	0.132071	0.0807103	0.0361875	0.0352124	0.0124415	0.0156076	0.0190495	0.0380358	0.0353327	0.0859301	0.0161382	0.00771753	0.0165096	0.00503588	0.123409	0.0237897	0.0506443	0.0335219	0.0207818	0.0171177	0.0346489	0.018347	0.0593613
SBS60	0.0366635	0.0910721	0.0122721	0.00750605	0.00572011	0.0905916	0.0244195	0.0274538	0.122099	0.0441447	0.0448101	0.0317512	0.0573178	0.0295778	0.0848793	0.0212921	0.215402	0.0597239	0.0752562	0.131905	0.120329	0.104796	0.105686	0.0333302	0.0342872	0.0439704	0.0361149	0.177731	0.0254958	0.0294709	0.0271886	0.00817897	0.0110761	0.0461244	0.0539672	0.129829	0.00695775	0.00348927	0.00635745	0.00518585	0.044334	0.0489563	0.116854	0.346517	0.0139165	0.00828677	0.0175174	0.00781968	0.193635
[truncated: 73 more columns]
